# Supplementary material for: Further insight into the photochemical behavior of 3-aryl-N-(arylsulfonyl)propiolamides: tunable synthetic route to phenanthrenes
Source: Royal Society of Chemistry journal article supplement (doi:10.1039/c7ra00193b), 2017-01-01

## Supplementary Information

For

# Further Insight into the Photochemical Behavior of 3-aryl-*N*-(arylsulfonyl) propiolamides: Tunable Synthetic Route to Phenanthrenes†

Ming Chen, Xinxin Zhao, Chao Yang, Yanpei Wang and Wujiong Xia\*

State Key Lab of Urban Water Resource and Environment, the Academy of Fundamental and Interdisciplinary Sciences, Harbin Institute of Technology, Harbin 150080

\*E-mail: [xiawj@hit.edu.cn](mailto:xiawj@hit.edu.cn)

## Contents

|                                                                              |         |
|------------------------------------------------------------------------------|---------|
| 1. General Information                                                       | S2      |
| 2. Typical procedure for preparation of substrates                           | S2      |
| 3. Characterization of substrates                                            | S2-S9   |
| 4. Photoinduced synthesis of phenanthrenes                                   | S9      |
| 5. Characterization of phenanthrenes and other involved compounds            | S9-S15  |
| 6. Reference                                                                 | S15     |
| 7. <sup>1</sup> H and <sup>13</sup> C spectrum for all the related compounds | S16-S79 |

## 1. General information

All the starting materials were purchased from Aldrich, EnergyChemical Chemicals and Aladdin, and all were used as received. All the relevant solvents were dried and purified according to the procedure from "Purification of Laboratory Chemicals book".  $^1\text{H}$  NMR (400 MHz or 600 MHz) and  $^{13}\text{C}$  NMR (151 MHz) spectra were recorded on Bruker AV-400 instrument in  $\text{CDCl}_3$  with TMS as internal standard. Chemical shift in parts per million relative to the chemical shift of  $\text{CDCl}_3$  at 7.26 ppm integration, multiplicities (s = singlet, d = doublet, t = triplet, q = quartet, m = multiplet) and for  $^{13}\text{C}$  NMR spectra were relative to the center line signal of the  $\text{CDCl}_3$  triplet at 77.16 ppm. HRMS (ESI) spectra were recorded on a Bruker Esquire LC mass spectrometer using electrospray ionization. GC-MS analysis was performed on a 7890A-5975C/Agilent and GC analysis on a 7890B/Agilent. Melting points were determined using a capillary melting point apparatus and are uncorrected. Flash column chromatography was performed using 200-300 mesh silica gel and eluted with petroleum/ ethyl acetate.

3-(p-tolyl)propionic acid, 3-(m-tolyl)propionic acid and 3-(4-methoxyphenyl)propionic acid were synthesized according to literature procedures<sup>1</sup>. The 3-(thiophen-2-yl)propionic acid and 3-(3,4,5-trimethoxyphenyl)propionic acid were prepared according to literature procedures<sup>2</sup>.

## 2. Typical procedure for preparation of substrates

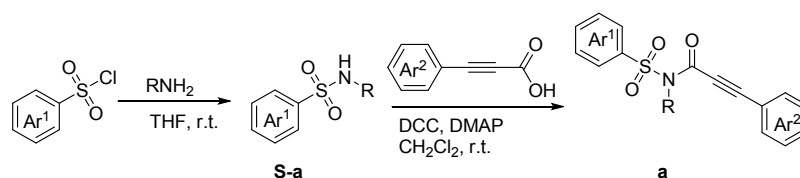

### Synthesis of S-a.

For substrates **1a**, **6a**, **7a** and **9a-30a**, **23a-28a**:  $\text{MeNH}_2$  (3 eq., 33% solution in methanol) was added to solution of arylsulfonyl chloride (1.0 eq.) in THF (0.2 mol/L). The mixture was stirred at room temperature for 10 minutes, poured into water and extracted with ethyl acetate, then the organic layer was dried over  $\text{MgSO}_4$  for 8 hours, filtered and concentrated to furnish the **S-a**, that was submitted to the next step without any purification.

For substrate **4a**, **5a** and **8a**, **S-a** was synthesized according to reported literature procedures<sup>3</sup>.

For substrate **2a** and **3a**, **S-a** was synthesized according to previous literature procedures<sup>4</sup>.

### Synthesis of a.

To a solution of 3-arylpropionic acid (1.1 eq.) in  $\text{CH}_2\text{Cl}_2$  (0.2 mol/L), DMAP (0.1 eq.) was added, then the solution was cooled to  $0\text{ }^\circ\text{C}$ . **S-a** (1.0 eq.) and DCC (1.2 eq.) were added sequentially. The resulting solution was stirred at room temperature until completion. The precipitated urea was then filtered off by celite and the filtrate was concentrated, the residue was purified by column chromatography on silica gel with petroleum/ethyl acetate to provide compound **a**.

## 3. Characterization of substrates

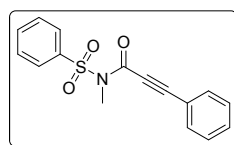

**N-methyl-3-phenyl-N-(phenylsulfonyl)propionamide (1a)**. White solid, m.p. =  $112.9\text{--}114.3\text{ }^\circ\text{C}$ . The compound was prepared following the typical procedure. Yield 80% (239.3 mg, 1.0 mmol);  $^1\text{H}$  NMR (600 MHz,  $\text{CDCl}_3$ ):  $\delta$  8.02 (dd,  $J = 8.4, 1.0$  Hz, 2H), 7.69 – 7.62 (m, 1H), 7.61 – 7.51 (m, 4H), 7.51 – 7.45 (m, 1H), 7.44 – 7.36 (m, 2H), 3.53 (s, 3H);  $^{13}\text{C}$  NMR (151 MHz,  $\text{CDCl}_3$ )  $\delta$  152.84, 138.73, 134.19, 132.92, 131.19, 129.24, 128.84, 128.21, 119.55, 93.99, 81.61, 33.55; GC-MS (EI):

299.0, 235.1, 178.1, 142.1, 129.1; HRMS (ESI): calc. for C<sub>16</sub>H<sub>13</sub>NNaO<sub>3</sub>S [M+Na]<sup>+</sup>: 322.0508, found: 322.0517.

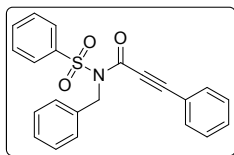

**N-benzyl-3-phenyl-N-(phenylsulfonyl)propiolamide (2a).** White solid, m.p. = 126.1-127.0°C. The compound was prepared following the typical procedure. Yield 70% (525.0 mg, 2.0 mmol); <sup>1</sup>H NMR (400 MHz, CDCl<sub>3</sub>) δ 7.75 (d, *J* = 7.9 Hz, 2H), 7.57 (t, *J* = 7.4 Hz, 1H), 7.49 – 7.29 (m, 12H), 5.31 (s, 2H); <sup>13</sup>C NMR (151 MHz, CDCl<sub>3</sub>) δ 153.04, 138.86, 136.26, 134.00, 132.88, 131.21, 128.85, 128.82, 128.75, 128.27, 128.18, 119.38, 94.05, 81.74, 50.54; GC-MS (EI): 375.1, 311.2, 234.1, 129.1, 91.1; HRMS (ESI): calc. for C<sub>22</sub>H<sub>17</sub>NNaO<sub>3</sub>S [M+Na]<sup>+</sup>: 398.0821, found: 398.0825.

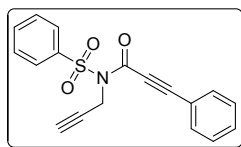

**3-phenyl-N-(phenylsulfonyl)-N-(prop-2-yn-1-yl)propiolamide (3a).** White solid, m.p. = 62.3-63.1°C. The compound was prepared following the typical procedure. Yield 60% (387.6 mg, 2.0 mmol); <sup>1</sup>H NMR (400 MHz, CDCl<sub>3</sub>) δ 8.13 (d, *J* = 7.9 Hz, 2H), 7.64 (t, *J* = 7.4 Hz, 1H), 7.51 (dt, *J* = 15.6, 7.5 Hz, 5H), 7.39 (t, *J* = 7.5 Hz, 2H), 4.88 (s, 2H), 2.37 (s, 1H); <sup>13</sup>C NMR (151 MHz, CDCl<sub>3</sub>) δ 152.01, 138.49, 134.32, 133.00, 131.36, 128.99, 128.85, 119.23, 94.35, 81.12, 77.92, 73.26, 36.33; GC-MS (EI): 323.1, 258.1, 182.1, 127.1, 77.1, 28.1; HRMS (ESI): calc. for C<sub>18</sub>H<sub>13</sub>NNaO<sub>3</sub>S [M+Na]<sup>+</sup>: 346.0508, found: 346.0513.

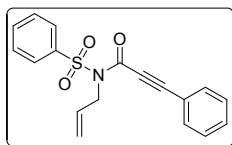

**N-allyl-3-phenyl-N-(phenylsulfonyl)propiolamide (4a).** White solid, m.p. = 67.4-68.5°C. The compound was prepared following the typical procedure. Yield 45% (292.5 mg, 2.0 mmol); <sup>1</sup>H NMR (400 MHz, CDCl<sub>3</sub>) δ 8.04 (d, *J* = 7.9 Hz, 2H), 7.62 (d, *J* = 7.3 Hz, 1H), 7.58 – 7.43 (m, 5H), 7.38 (t, *J* = 7.4 Hz, 2H), 5.99 (dq, *J* = 10.5, 5.6 Hz, 1H), 5.41 (d, *J* = 17.1 Hz, 1H), 5.32 (d, *J* = 10.2 Hz, 1H), 4.71 (d, *J* = 5.3 Hz, 2H); <sup>13</sup>C NMR (151 MHz, CDCl<sub>3</sub>) δ 152.66, 138.90, 134.09, 132.80, 132.43, 131.18, 128.94, 128.81, 128.76, 119.34, 119.16, 93.23, 81.50, 49.56; GC-MS (EI): 325.2, 260.1, 184.1, 129.1, 77.1; HRMS (ESI): calc. for C<sub>18</sub>H<sub>15</sub>NNaO<sub>3</sub>S [M+Na]<sup>+</sup>: 348.0665, found: 348.0662.

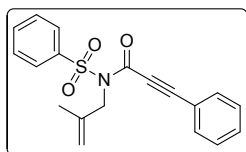

**N-(2-methylallyl)-3-phenyl-N-(phenylsulfonyl)propiolamide (5a).** White solid, m.p. = 107.3-108.2°C. The compound was prepared following the typical procedure. Yield 55% (372.9 mg, 2.0 mmol); <sup>1</sup>H NMR (400 MHz, CDCl<sub>3</sub>) δ 8.05 (d, *J* = 7.7 Hz, 2H), 7.63 (t, *J* = 7.4 Hz, 1H), 7.58 – 7.43 (m, 5H), 7.38 (t, *J* = 7.4 Hz, 2H), 5.02 (d, *J* = 9.5 Hz, 2H), 4.65 (s, 2H), 1.82 (s, 3H); <sup>13</sup>C NMR (151 MHz, CDCl<sub>3</sub>) δ 153.06, 139.91, 138.83, 134.13, 132.87, 131.17, 128.99, 128.89, 128.85, 119.46, 113.13, 92.96, 81.54, 52.61, 20.37; GC-MS (EI): 339.2, 274.1, 198.2, 155.2, 129.1, 77.1; HRMS (ESI): calc. for C<sub>19</sub>H<sub>17</sub>NNaO<sub>3</sub>S [M+Na]<sup>+</sup>: 362.0821, found: 362.0823.

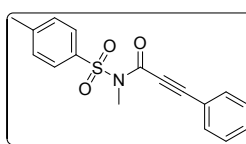

**N-methyl-3-phenyl-N-tosylpropiolamide (6a).** White solid, m.p. = 78.4-79.3°C. The compound was prepared following the typical procedure. Yield 85% (266.2 mg, 1.0 mmol); <sup>1</sup>H NMR (400 MHz, CDCl<sub>3</sub>) δ 7.89 (d, *J* = 7.7 Hz, 2H), 7.57 (d, *J* = 7.4 Hz, 2H), 7.47 (t, *J* = 7.3 Hz, 1H), 7.39 (t, *J* = 7.3 Hz, 2H), 7.32 (d, *J* = 7.7 Hz, 2H), 3.50 (s, 3H), 2.43 (s, 3H); <sup>13</sup>C NMR (151

MHz, CDCl<sub>3</sub>)  $\delta$  152.87, 145.36, 135.75, 132.92, 131.13, 129.83, 128.83, 128.26, 119.63, 93.81, 81.69, 33.49, 21.80; GC-MS (EI): 313.1, 249.1, 236.1, 192.1, 142.1, 129.1; HRMS (ESI): calc. for C<sub>17</sub>H<sub>15</sub>NNaO<sub>3</sub>S [M+Na]<sup>+</sup>: 336.0665, found:336.0672.

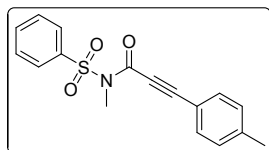

**N-methyl-N-(phenylsulfonyl)-3-(p-tolyl)propiolamide (7a).** White solid, m.p. = 140.4-141.1°C. The compound was prepared following the typical procedure. Yield 85% (2.0 mg, 1.0 mmol); <sup>1</sup>H NMR (600 MHz, CDCl<sub>3</sub>)  $\delta$  8.08 – 7.98 (m, 2H), 7.64 (t, *J* = 7.5 Hz, 1H), 7.53 (t, *J* = 7.9 Hz, 2H), 7.46 (d, *J* = 8.1 Hz, 2H), 7.20 (d, *J* = 8.0 Hz, 2H), 3.52 (s, 3H), 2.39 (s, 3H); <sup>13</sup>C NMR (151 MHz, CDCl<sub>3</sub>)  $\delta$  152.97, 141.99, 138.79, 134.13, 132.95, 129.64, 129.21, 128.22, 116.43, 94.61, 81.39, 33.56, 21.92; GC-MS (EI): 313.2, 298.1, 248.2, 192.1, 156.2, 143.1, 77.1; HRMS (ESI): calc. for C<sub>17</sub>H<sub>15</sub>NNaO<sub>3</sub>S [M+Na]<sup>+</sup>: 336.0665, found: 336.0672.

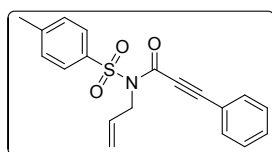

**N-allyl-3-phenyl-N-tosylpropiolamide (8a).** White solid, m.p. = 44.4-45.9°C. The compound was prepared following the typical procedure. Yield 65% (440.7 mg, 2.0 mmol); <sup>1</sup>H NMR (400 MHz, CDCl<sub>3</sub>)  $\delta$  7.92 (d, *J* = 8.1 Hz, 2H), 7.52 (d, *J* = 7.9 Hz, 2H), 7.47 (t, *J* = 7.2 Hz, 1H), 7.38 (t, *J* = 7.6 Hz, 2H), 7.30 (d, *J* = 8.0 Hz, 2H), 5.98 (dq, *J* = 10.6, 5.7 Hz, 1H), 5.40 (d, *J* = 17.1 Hz, 1H), 5.31 (d, *J* = 11.1 Hz, 1H), 4.69 (d, *J* = 5.4 Hz, 2H), 2.42 (s, 3H); <sup>13</sup>C NMR (151 MHz, CDCl<sub>3</sub>)  $\delta$  152.72, 145.27, 135.96, 132.83, 132.55, 131.14, 129.56, 128.89, 128.83, 119.49, 119.08, 93.07, 81.61, 49.56, 21.80; GC-MS (EI): 339.1, 192.1, 168.1, 129.0, 91.1, 75.1; HRMS (ESI): calc. for C<sub>19</sub>H<sub>17</sub>NNaO<sub>3</sub>S [M+K]<sup>+</sup>: 362.0821, found: 362.0822.

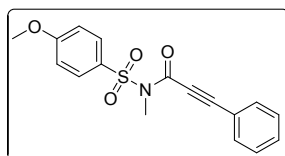

**N-((4-methoxyphenyl)sulfonyl)-N-methyl-3-phenylpropiolamide (9a).** White solid, m.p. = 55.9-57.3°C. The compound was prepared following the typical procedure. Yield 70% (276.4mg, 1.2mmol); <sup>1</sup>H NMR (400 MHz, CDCl<sub>3</sub>)  $\delta$  7.95 (d, *J* = 8.7 Hz, 2H), 7.58 (d, *J* = 7.9 Hz, 2H), 7.48 (t, *J* = 7.3 Hz, 1H), 7.39 (t, *J* = 7.6 Hz, 2H), 6.97 (d, *J* = 8.7 Hz, 2H), 3.87 (s, 3H), 3.50 (s, 3H); <sup>13</sup>C NMR (151 MHz, CDCl<sub>3</sub>)  $\delta$  164.14, 152.93, 132.93, 131.12, 130.67, 130.08, 128.84, 119.68, 114.37, 93.70, 81.72, 55.88, 33.55; GC-MS (EI): 329.0, 265.1, 208.1, 193.0, 142.1, 129.1; HRMS (ESI): calc. for C<sub>17</sub>H<sub>15</sub>NNaO<sub>4</sub>S [M+Na]<sup>+</sup>: 352.0614, found: 352.0618.

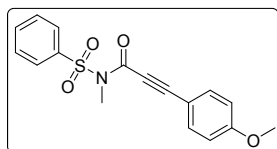

**3-(4-methoxyphenyl)-N-methyl-N-(phenylsulfonyl)propiolamide (10a).** White solid, m.p. = 120.5-121.8°C. The compound was prepared following the typical procedure. Yield 75% (370.1 mg, 1.5 mmol); <sup>1</sup>H NMR (600 MHz, CDCl<sub>3</sub>)  $\delta$  8.07 – 7.97 (m, 2H), 7.63 (t, *J* = 7.5 Hz, 1H), 7.57 – 7.48 (m, 4H), 6.95 – 6.85 (m, 2H), 3.84 (s, 3H), 3.51 (s, 3H); <sup>13</sup>C NMR (151 MHz, CDCl<sub>3</sub>)  $\delta$  161.99, 153.05, 138.82, 134.96, 134.09, 129.19, 128.17, 114.56, 111.27, 95.02, 81.33, 55.58, 33.53; GC-MS (EI): 329.0, 264.0, 208.0, 159.0, 144.0; HRMS (ESI): calc. for C<sub>17</sub>H<sub>15</sub>NNaO<sub>4</sub>S [M+Na]<sup>+</sup>: 352.0614, found: 352.0619.

**N-((4-fluorophenyl)sulfonyl)-N-methyl-3-phenylpropiolamide (11a).** White solid, m.p. = 91.1-92.2°C. The compound was prepared following the typical procedure. Yield 65% (309.0mg, 1.5mmol); <sup>1</sup>H NMR (600 MHz, CDCl<sub>3</sub>)  $\delta$  8.05 (dd, *J* = 8.8, 5.0 Hz, 2H), 7.56 (d, *J* = 7.3 Hz, 2H),

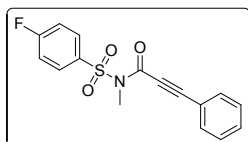

7.48 (t,  $J = 7.5$  Hz, 1H), 7.40 (t,  $J = 7.6$  Hz, 2H), 7.20 (t,  $J = 8.5$  Hz, 2H), 3.54 (s, 3H);  $^{13}\text{C}$  NMR (151 MHz,  $\text{CDCl}_3$ )  $\delta$  166.01 (d,  $J = 257.3$  Hz), 152.84, 134.59 (d,  $J = 3.2$  Hz), 132.90, 131.37, 131.30, 128.88, 119.34, 116.58, 116.43, 94.08, 81.41, 33.76; GC-MS (EI): 317.2, 253.2, 142.1, 129.1, 95.1; HRMS (ESI): calc. for  $\text{C}_{16}\text{H}_{12}\text{FNNaO}_3\text{S}$   $[\text{M}+\text{Na}]^+$ : 340.0414, found: 340.0420.

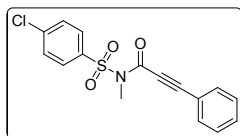

**N-((4-chlorophenyl)sulfonyl)-N-methyl-3-phenylpropiolamide (12a).** White solid, m.p. = 68.8-70.1°C. The compound was prepared following the typical procedure. Yield 75% (374.7 mg, 1.5 mmol);  $^1\text{H}$  NMR (400 MHz,  $\text{CDCl}_3$ )  $\delta$  7.96 (d,  $J = 8.4$  Hz, 2H), 7.57 (d,  $J = 7.7$  Hz, 2H), 7.49 (t,  $J = 8.7$  Hz, 3H), 7.40 (t,  $J = 7.5$  Hz, 2H), 3.54 (s, 3H);  $^{13}\text{C}$  NMR (151 MHz,  $\text{CDCl}_3$ )  $\delta$  152.83, 140.97, 137.06, 132.94, 131.34, 129.86, 129.52, 128.91, 119.35, 94.22, 81.41, 33.79; GC-MS (EI): 333.1, 256.1, 234.2, 142.1, 129.1, 111.1; HRMS (ESI): calc. for  $\text{C}_{16}\text{H}_{12}\text{ClNNaO}_3\text{S}$   $[\text{M}+\text{Na}]^+$ : 356.0119, found: 356.0118.

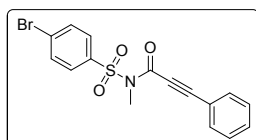

**N-((4-bromophenyl)sulfonyl)-N-methyl-3-phenylpropiolamide (13a).** White solid, m.p. = 77.2-78.5 °C. The compound was prepared following the typical procedure. Yield 80% (330.8mg, 1.1mmol);  $^1\text{H}$  NMR (400 MHz,  $\text{CDCl}_3$ )  $\delta$  7.88 (d,  $J = 8.3$  Hz, 2H), 7.67 (d,  $J = 8.3$  Hz, 2H), 7.56 (d,  $J = 7.5$  Hz, 2H), 7.49 (t,  $J = 7.4$  Hz, 1H), 7.40 (t,  $J = 7.5$  Hz, 2H), 3.54 (s, 3H);  $^{13}\text{C}$  NMR (151 MHz,  $\text{CDCl}_3$ )  $\delta$  152.79, 137.57, 132.92, 132.49, 131.33, 129.85, 129.54, 128.89, 119.31, 94.20, 81.38, 33.78; GC-MS (EI): 376.1, 300.1, 256.1, 143.1, 129.1; HRMS (ESI): calc. for  $\text{C}_{16}\text{H}_{12}\text{BrNNaO}_3\text{S}$   $[\text{M}+\text{Na}]^+$ : 399.9613, found: 399.9617.

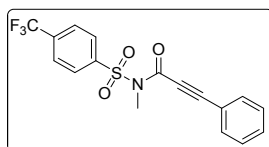

**N-methyl-3-phenyl-N-(4-(trifluoromethyl)phenyl)sulfonylpropiolamide (14a).** White solid, m.p. = 71.3-72.3°C. The compound was prepared following the typical procedure. Yield 70% (385.4mg, 1.5mmol);  $^1\text{H}$  NMR (400 MHz,  $\text{CDCl}_3$ )  $\delta$  8.16 (d,  $J = 8.1$  Hz, 2H), 7.80 (d,  $J = 8.1$  Hz, 2H), 7.55 (d,  $J = 7.4$  Hz, 2H), 7.49 (t,  $J = 7.4$  Hz, 1H), 7.40 (t,  $J = 7.5$  Hz, 2H), 3.58 (s, 3H);  $^{13}\text{C}$  NMR (151 MHz,  $\text{CDCl}_3$ )  $\delta$  152.81, 142.06, 135.68 (q,  $J = 33.3$  Hz), 132.94, 131.45, 129.00, 128.92, 126.34 (q,  $J = 3.6$  Hz), 123.13 (q,  $J = 273.1$  Hz), 119.17, 94.50, 81.23, 33.92; GC-MS (EI): 367.2, 303.1, 246.1, 142.1, 129.1, 75.1; HRMS (ESI): calc. for  $\text{C}_{17}\text{H}_{12}\text{F}_3\text{NNaO}_3\text{S}$   $[\text{M}+\text{Na}]^+$ : 390.0382, found: 390.0387.

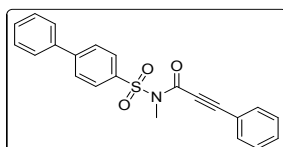

**N-([1,1'-biphenyl]-4-yl)sulfonyl)-N-methyl-3-phenylpropiolamide (15a).** White solid, m.p. = 104.6-105.4°C. The compound was prepared following the typical procedure. Yield 65% (243.8mg, 1.0mmol);  $^1\text{H}$  NMR (600 MHz,  $\text{CDCl}_3$ )  $\delta$  8.13 – 8.04 (m, 2H), 7.77 – 7.69 (m, 2H), 7.64 – 7.56 (m, 4H), 7.52 – 7.46 (m, 3H), 7.45 – 7.37 (m, 3H), 3.56 (s, 3H);  $^{13}\text{C}$  NMR (151 MHz,  $\text{CDCl}_3$ )  $\delta$  152.92, 147.19, 139.13, 137.16, 132.95, 131.20, 129.24, 128.90, 128.87, 128.82, 127.83, 127.54, 119.59, 94.02, 81.67, 33.63; GC-MS (EI): 375.2, 311.2, 254.1, 142.1, 129.1; HRMS (ESI): calc. for  $\text{C}_{22}\text{H}_{17}\text{NNaO}_3\text{S}$   $[\text{M}+\text{Na}]^+$ : 398.0821, found: 398.0823.

**N-((4-(tert-butyl)phenyl)sulfonyl)-N-methyl-3-phenylpropiolamide (16a).** White solid, m.p. =

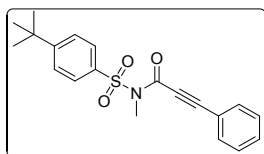

93.4-94.6°C. The compound was prepared following the typical procedure. Yield 40% (355.0 mg, 2.5 mmol); <sup>1</sup>H NMR (400 MHz, CDCl<sub>3</sub>) δ 7.93 (d, *J* = 8.6 Hz, 2H), 7.55 (dd, *J* = 16.6, 7.9 Hz, 4H), 7.48 (t, *J* = 7.5 Hz, 1H), 7.39 (t, *J* = 7.5 Hz, 2H), 3.51 (s, 3H), 1.34 (d, *J* = 5.4 Hz, 9H); <sup>13</sup>C NMR (151 MHz, CDCl<sub>3</sub>) δ 158.20, 152.91, 135.63, 132.94, 131.13, 128.83, 128.10, 126.29, 119.68, 93.83, 81.75, 35.45, 33.47, 31.13; GC-MS (EI): 355.1, 340.1, 278.1, 263.1, 235.1, 142.1, 118.1; HRMS (ESI): calc. for C<sub>20</sub>H<sub>22</sub>NO<sub>3</sub>S [M+H]<sup>+</sup>: 356.1315, found: 356.1323.

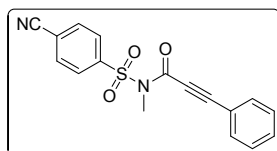

***N*-((4-cyanophenyl)sulfonyl)-*N*-methyl-3-phenylpropionamide (17a).** White solid, m.p. = 145.3-146.8°C. The compound was prepared following the typical procedure. Yield 60% (291.6 mg, 1.5 mmol); <sup>1</sup>H NMR (600 MHz, CDCl<sub>3</sub>) δ 8.14 (d, *J* = 8.5 Hz, 2H), 7.83 (d, *J* = 8.5 Hz, 2H), 7.56 (d, *J* = 7.2 Hz, 2H), 7.51 (t, *J* = 7.5 Hz, 1H), 7.41 (t, *J* = 7.7 Hz, 2H), 3.59 (s, 3H); <sup>13</sup>C NMR (151 MHz, CDCl<sub>3</sub>) δ 152.83, 142.65, 132.99, 132.91, 131.58, 129.17, 128.99, 119.06, 117.84, 117.15, 94.77, 81.11, 34.07; GC-MS (EI): 323.1, 247.1, 203.1, 142.1, 129.1, 75.1; HRMS (ESI): calc. for C<sub>17</sub>H<sub>12</sub>N<sub>2</sub>NaO<sub>3</sub>S [M+Na]<sup>+</sup>: 347.0461, found: 347.0462.

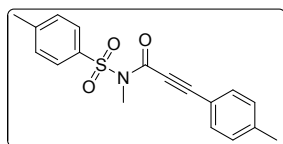

***N*-methyl-3-(*p*-tolyl)-*N*-tosylpropionamide (18a).** White solid, m.p. = 123.4-124.6°C. The compound was prepared following the typical procedure. Yield 80% (392.4 mg, 1.5 mmol); <sup>1</sup>H NMR (400 MHz, CDCl<sub>3</sub>) δ 7.89 (d, *J* = 8.2 Hz, 2H), 7.47 (d, *J* = 7.9 Hz, 2H), 7.31 (d, *J* = 8.1 Hz, 2H), 7.20 (d, *J* = 7.9 Hz, 2H), 3.50 (s, 3H), 2.41 (d, *J* = 14.0 Hz, 6H); <sup>13</sup>C NMR (151 MHz, CDCl<sub>3</sub>) δ 153.01, 145.29, 141.92, 135.82, 132.95, 129.80, 129.62, 128.28, 116.53, 94.43, 81.47, 33.51, 21.92, 21.81; GC-MS (EI): 327.2, 250.2, 206.2, 148.1, 115.1, 91.1; HRMS (ESI): calc. for C<sub>18</sub>H<sub>17</sub>NNaO<sub>3</sub>S [M+Na]<sup>+</sup>: 350.0821, found: 350.0825.

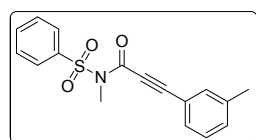

***N*-methyl-*N*-(phenylsulfonyl)-3-(*m*-tolyl)propionamide (19a).** White solid, m.p. = 107.2-108.3°C. The compound was prepared following the typical procedure. Yield 65% (305.2 mg, 1.5 mmol); <sup>1</sup>H NMR (400 MHz, CDCl<sub>3</sub>) δ 8.02 (d, *J* = 7.7 Hz, 2H), 7.65 (t, *J* = 7.5 Hz, 1H), 7.53 (t, *J* = 7.7 Hz, 2H), 7.37 (d, *J* = 6.8 Hz, 2H), 7.31 – 7.23 (m, 2H), 3.52 (s, 3H), 2.35 (s, 3H); <sup>13</sup>C NMR (151 MHz, CDCl<sub>3</sub>) δ 152.88, 138.73, 138.70, 134.15, 133.35, 132.13, 130.06, 129.21, 128.72, 128.21, 119.32, 94.34, 81.33, 33.55, 21.30; GC-MS (EI): 313.2, 249.2, 192.2, 156.2, 143.1, 77.1; HRMS (ESI): calc. for C<sub>17</sub>H<sub>15</sub>NNaO<sub>3</sub>S [M+Na]<sup>+</sup>: 336.0665, found: 336.0672.

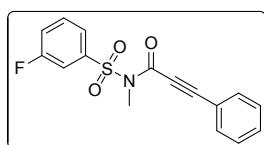

***N*-((3-fluorophenyl)sulfonyl)-*N*-methyl-3-phenylpropionamide (20a).** White solid, m.p. = 126.0-127.1°C. The compound was prepared following the typical procedure. Yield 50% (317.0 mg, 2.0 mmol); <sup>1</sup>H NMR (400 MHz, CDCl<sub>3</sub>) δ 7.82 (d, *J* = 7.8 Hz, 1H), 7.74 (d, *J* = 8.0 Hz, 1H), 7.57 (d, *J* = 7.7 Hz, 2H), 7.54 – 7.45 (m, 2H), 7.44 – 7.31 (m, 3H), 3.54 (s, 3H); <sup>13</sup>C NMR (151 MHz, CDCl<sub>3</sub>) δ 162.27 (d, *J* = 252.4 Hz), 152.78, 140.53 (d, *J* = 7.1 Hz), 132.96, 131.35, 131.05 (d, *J* = 7.7 Hz), 128.91, 124.08 (d, *J* = 3.3 Hz), 121.52 (d, *J* = 21.2 Hz), 119.35, 115.81 (d, *J* = 24.9 Hz), 94.38, 81.40, 33.76; GC-MS (EI): 317.0, 253.1, 196.0, 129.0, 95.1, 75.1; HRMS (ESI): calc. for C<sub>16</sub>H<sub>12</sub>FNNaO<sub>3</sub>S [M+Na]<sup>+</sup>: 340.0414, found: 340.0420.

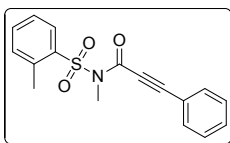

***N*-methyl-3-phenyl-*N*-(*o*-tolylsulfonyl)propiolamide (21a).** White solid, m.p. = 61.2-62.3°C. The compound was prepared following the typical procedure. Yield 80% (375.6mg, 1.5mmol); <sup>1</sup>H NMR (400 MHz, CDCl<sub>3</sub>) δ 8.12 (d, *J* = 8.0 Hz, 1H), 7.56 – 7.41 (m, 4H), 7.34 (dt, *J* = 18.7, 8.3 Hz, 4H), 3.56 (s, 3H), 2.60 (s, 3H); <sup>13</sup>C NMR (151 MHz, CDCl<sub>3</sub>) δ 152.84, 137.71, 137.43, 134.03, 132.82, 132.75, 131.42, 131.11, 128.76, 126.35, 119.49, 94.33, 81.44, 33.09, 20.34; GC-MS (EI): 313.2, 248.2, 234.2, 192.2, 142.1; HRMS (ESI): calc. for C<sub>17</sub>H<sub>15</sub>NNaO<sub>3</sub>S [M+Na]<sup>+</sup>: 336.0670, found: 336.0664.

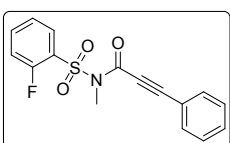

***N*-((2-fluorophenyl)sulfonyl)-*N*-methyl-3-phenylpropiolamide (22a).** White solid, m.p. = 132.2-133.5°C. The compound was prepared following the typical procedure. Yield 55% (261.5mg, 1.5mmol); <sup>1</sup>H NMR (400 MHz, CDCl<sub>3</sub>) δ 8.09 (t, *J* = 7.3 Hz, 1H), 7.62 (d, *J* = 6.2 Hz, 1H), 7.49 (dd, *J* = 19.6, 7.4 Hz, 3H), 7.38 (t, *J* = 7.4 Hz, 2H), 7.30 – 7.19 (m, 3H), 3.61 (s, 3H); <sup>13</sup>C NMR (151 MHz, CDCl<sub>3</sub>) δ 159.09 (d, *J* = 256.7 Hz), 152.77, 136.40 (d, *J* = 8.7 Hz), 132.83, 132.12, 131.22, 128.83, 127.10 (d, *J* = 13.7 Hz), 124.43 (d, *J* = 3.6 Hz), 119.40, 117.33 (d, *J* = 20.8 Hz), 94.35, 81.27, 33.48; GC-MS (EI): 317.1, 240.1, 196.1, 142.1, 129.1, 118.1; HRMS (ESI): calc. for C<sub>16</sub>H<sub>12</sub>FNNaO<sub>3</sub>S [M+Na]<sup>+</sup>: 340.0414, found: 340.0422.

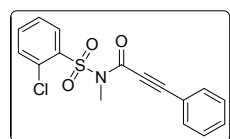

***N*-((2-chlorophenyl)sulfonyl)-*N*-methyl-3-phenylpropiolamide (23a).** White solid, m.p. = 110.2-111.5°C. The compound was prepared following the typical procedure. Yield 60% (299.7 mg, 1.5 mmol); <sup>1</sup>H NMR (400 MHz, CDCl<sub>3</sub>) δ 8.35 – 8.23 (m, 1H), 7.58 – 7.44 (m, 5H), 7.44 – 7.34 (m, 3H), 3.66 (s, 3H); <sup>13</sup>C NMR (151 MHz, CDCl<sub>3</sub>) δ 152.75, 136.77, 134.88, 133.55, 132.81, 132.06, 131.88, 131.22, 128.80, 127.10, 119.29, 94.31, 81.16, 33.91; GC-MS (EI): 333.0, 298.0, 268.1, 234.1, 212.1, 129.1, 75.1; HRMS (ESI): calc. for C<sub>16</sub>H<sub>12</sub>ClNNaO<sub>3</sub>S [M+Na]<sup>+</sup>: 356.0119, found: 356.0123.

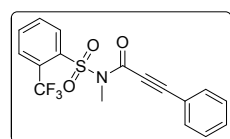

***N*-methyl-3-phenyl-*N*-((2-(trifluoromethyl)phenyl)sulfonyl)propiolamide (24a).** White solid, m.p. = 86.3-87.1°C. The compound was prepared following the typical procedure. Yield 65% (477.1mg, 2.0mmol); <sup>1</sup>H NMR (600 MHz, CDCl<sub>3</sub>) δ 8.52 (d, *J* = 5.6 Hz, 1H), 7.87 (d, *J* = 4.9 Hz, 1H), 7.80 – 7.67 (m, 2H), 7.48 (dd, *J* = 19.7, 7.5 Hz, 3H), 7.38 (t, *J* = 7.5 Hz, 2H), 3.63 (s, 3H); <sup>13</sup>C NMR (151 MHz, CDCl<sub>3</sub>) δ 153.15, 137.55, 134.80, 134.04, 132.90, 132.29, 131.33, 128.83, 128.29 (q, *J* = 6.2 Hz), 127.71 (q, *J* = 33.5 Hz), 122.58 (q, *J* = 273.8 Hz), 119.15, 94.28, 81.02, 33.92; GC-MS (EI): 367.2, 302.1, 246.2, 145.1, 129.1; HRMS (ESI): calc. for C<sub>17</sub>H<sub>12</sub>F<sub>3</sub>NNaO<sub>3</sub>S [M+Na]<sup>+</sup>: 390.0382, found: 390.0388.

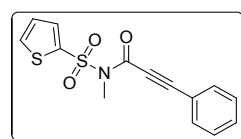

***N*-methyl-3-phenyl-*N*-(thiophen-2-ylsulfonyl)propiolamide (25a).** White solid, m.p. = 108.6-109.4°C. The compound was prepared following the typical procedure. Yield 65% (495.6 mg, 2.5 mmol); <sup>1</sup>H NMR (400 MHz, CDCl<sub>3</sub>) δ 7.85 (s, 1H), 7.69 (d, *J* = 4.7 Hz, 1H), 7.62 (d, *J* = 7.4 Hz, 2H), 7.49 (t, *J* = 7.5 Hz, 1H), 7.41 (t, *J* = 7.5 Hz, 2H), 7.13 (d, *J* = 3.7 Hz, 1H), 3.50 (s,

3H);  $^{13}\text{C}$  NMR (151 MHz,  $\text{CDCl}_3$ )  $\delta$  152.76, 138.44, 134.93, 134.25, 133.11, 131.29, 128.88, 127.60, 119.59, 94.43, 81.63, 33.44; GC-MS (EI): 305.1, 272.1, 184.1, 142.1, 129.1, 75.1; HRMS (ESI): calc. for  $\text{C}_{14}\text{H}_{11}\text{NNaO}_3\text{S}_2$   $[\text{M}+\text{Na}]^+$ : 328.0073, found: 328.0080.

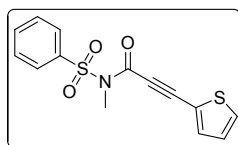

***N*-methyl-*N*-(phenylsulfonyl)-3-(thiophen-2-yl)propiolamide (26a).**

White solid, m.p. = 109.5-110.2°C. The compound was prepared following the typical procedure. Yield 60% (366.0 mg, 2.0 mmol);  $^1\text{H}$  NMR (600 MHz,  $\text{CDCl}_3$ )  $\delta$  8.01 (d,  $J$  = 7.5 Hz, 2H), 7.65 (t,  $J$  = 7.5 Hz, 1H), 7.57 – 7.47 (m, 4H), 7.08 (dd,  $J$  = 4.8, 4.0 Hz, 1H), 3.50 (s, 3H);  $^{13}\text{C}$  NMR (151 MHz,  $\text{CDCl}_3$ )  $\delta$  152.64, 138.73, 136.92, 134.22, 131.98, 129.31, 128.17, 127.91, 119.29, 88.16, 85.98, 33.38; GC-MS (EI): 305.0, 240.1, 184.0, 135.0, 77.1; HRMS (ESI): calc. for  $\text{C}_{14}\text{H}_{11}\text{NNaO}_3\text{S}_2$   $[\text{M}+\text{Na}]^+$ : 328.0073, found: 328.0080.

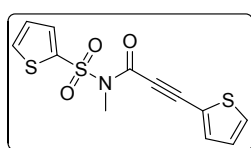

***N*-methyl-3-(thiophen-2-yl)-*N*-(thiophen-2-ylsulfonyl)propiolamide (27a).**

Slight brown solid, m.p. = 137.5-138.7°C. The compound was prepared following the typical procedure. Yield 65% (404.3 mg, 2.0 mmol);  $^1\text{H}$  NMR (600 MHz,  $\text{CDCl}_3$ )  $\delta$  7.85 (d,  $J$  = 3.6 Hz, 1H), 7.70 (d,  $J$  = 4.9 Hz, 1H), 7.54 (t,  $J$  = 4.8 Hz, 2H), 7.13 (t,  $J$  = 4.4 Hz, 1H), 7.11 – 7.06 (m, 1H), 3.47 (s, 3H);  $^{13}\text{C}$  NMR (151 MHz,  $\text{CDCl}_3$ )  $\delta$  152.56, 138.40, 137.11, 134.90, 134.27, 132.16, 127.94, 127.64, 119.32, 88.63, 86.01, 33.27; GC-MS (EI): 311.0, 279.0, 187.0, 158.0, 132.0; HRMS (ESI): calc. for  $\text{C}_{12}\text{H}_9\text{NNaO}_3\text{S}_3$   $[\text{M}+\text{Na}]^+$ : 333.9637, found: 333.9643.

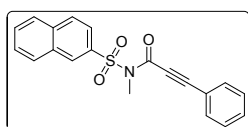

***N*-methyl-*N*-(naphthalen-2-ylsulfonyl)-3-**

**phenylpropiolamide (28a).** White solid, m.p. = 107.2-108.1°C. The

compound was prepared following the typical procedure. Yield 50% (349.0 mg, 2.0 mmol);  $^1\text{H}$  NMR (600 MHz,  $\text{CDCl}_3$ )  $\delta$  8.62 (s, 1H), 8.02 – 7.85 (m, 4H), 7.72 – 7.64 (m, 1H), 7.60 (dd,  $J$  = 11.1, 3.9 Hz, 1H), 7.57 – 7.51 (m, 2H), 7.47 (t,  $J$  = 7.5 Hz, 1H), 7.38 (t,  $J$  = 7.7 Hz, 2H), 3.58 (s, 3H);  $^{13}\text{C}$  NMR (151 MHz,  $\text{CDCl}_3$ )  $\delta$  152.83, 135.49, 135.39, 132.88, 131.90, 131.15, 130.54, 129.65, 129.62, 129.59, 128.81, 128.07, 127.91, 122.43, 119.54, 93.98, 81.67, 33.61; GC-MS (EI): 349.1, 285.1, 228.1, 142.1, 127.1; HRMS (ESI): calc. for  $\text{C}_{20}\text{H}_{15}\text{NNaO}_3\text{S}$   $[\text{M}+\text{Na}]^+$ : 372.0665, found: 372.0670.

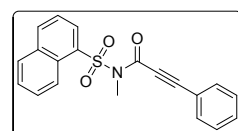

***N*-methyl-*N*-(naphthalen-1-ylsulfonyl)-3-phenylpropiolamide**

**(29a).** White solid, m.p. = 107.3-108.5°C. The compound was prepared

following the typical procedure. Yield 45% (314.1 mg, 2.0 mmol);  $^1\text{H}$  NMR (600 MHz,  $\text{CDCl}_3$ )  $\delta$  8.48 (d,  $J$  = 6.5 Hz, 2H), 8.12 (d,  $J$  = 8.1 Hz, 1H), 7.97 (d,  $J$  = 8.1 Hz, 1H), 7.69 (t,  $J$  = 7.5 Hz, 1H), 7.62 (t,  $J$  = 7.3 Hz, 1H), 7.57 – 7.42 (m, 4H), 7.36 (t,  $J$  = 7.5 Hz, 2H), 3.66 (s, 3H);  $^{13}\text{C}$  NMR (151 MHz,  $\text{CDCl}_3$ )  $\delta$  152.74, 135.76, 134.29, 133.61, 132.83, 132.75, 131.11, 129.54, 129.02, 128.78, 128.40, 127.18, 124.15, 123.67, 119.52, 94.27, 81.59, 33.37; GC-MS (EI): 349.2, 285.1, 228.2, 215.2, 142.1, 129.1; HRMS (ESI): calc. for  $\text{C}_{20}\text{H}_{15}\text{NNaO}_3\text{S}$   $[\text{M}+\text{Na}]^+$ : 372.0665, found: 372.0671.

***N*-methyl-*N*-(phenylsulfonyl)-3-(3,4,5-trimethoxyphenyl)propiolamide (30a).** Brown solid, m.p. = 63.5-65.0°C;  $^1\text{H}$  NMR (600 MHz,  $\text{CDCl}_3$ )  $\delta$  8.01 (d,  $J$  = 7.6 Hz, 2H), 7.69 – 7.61 (m, 1H),



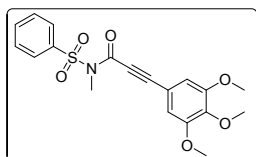

7.53 (dd,  $J = 16.9, 9.2$  Hz, 2H), 6.80 (s, 2H), 3.88 (s, 3H), 3.85 (s, 6H), 3.50 (s, 3H);  $^{13}\text{C}$  NMR (151 MHz,  $\text{CDCl}_3$ )  $\delta$  153.37, 152.82, 141.36, 138.71, 134.17, 129.26, 128.14, 114.17, 110.22, 94.51, 80.98, 61.16, 56.40, 33.50; GC-MS (EI): 389.0, 324.1, 253.1, 208.1, 77.0, 51.0; HRMS (ESI): calc. for  $\text{C}_{19}\text{H}_{19}\text{NNaO}_6\text{S}$   $[\text{M}+\text{Na}]^+$ : 412.0825, found: 412.0826.

#### 4. Photoinduced synthesis of phenanthrenes.

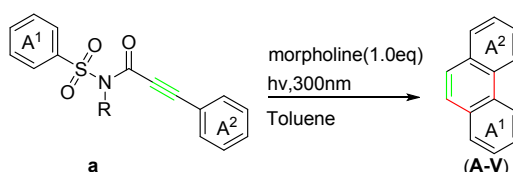

##### General procedure:

The solution of substrate **a** (0.2 mmol) in anhydrous toluene (40 mL) was placed in a dry quartz tube, then the organic base morpholine (0.2 mmol) was added and well mixed, the reaction system was irradiated under the 300 nm UV light. After the reaction finished, the solvent was removed in vacuo, the residue was purified by silica gel column chromatography using petroleum eluent to afford the phenanthrenes product.

#### 5. Characterization of phenanthrenes and other involved compounds.

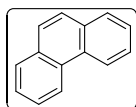

**Phenanthrene (A).** Substrate **1a** was irradiated for 0.9 h, 28.5 mg, 80% yield; Substrate **2a** was irradiated for 1.2 h, 26.7 mg, 75% yield; Substrate **3a** was irradiated for 1.0 h, 25.0 mg, 70% yield; Substrate **4a** was irradiated for 1.1 h, 26.7 mg, 75% yield; Substrate **5a** was irradiated for 1.0 h, 31.0 mg, 87% yield;  $^1\text{H}$  NMR (400 MHz,  $\text{CDCl}_3$ )  $\delta$  8.71 (d,  $J = 8.1$  Hz, 2H), 7.91 (d,  $J = 7.6$  Hz, 2H), 7.76 (s, 2H), 7.65 (dd,  $J = 16.1, 7.6$  Hz, 4H);  $^{13}\text{C}$  NMR (151 MHz,  $\text{CDCl}_3$ )  $\delta$  132.17, 130.42, 128.70, 127.05, 126.70, 122.79. The analytical data match those reported in the literature<sup>5</sup>.

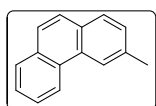

**3-methylphenanthrene (B).** Substrate **6a** was irradiated for 1.0 h, 32.6 mg, 85% yield; Substrate **7a** was irradiated for 1.2 h, 34.6 mg, 90% yield; Substrate **8a** was irradiated for 1.2 h, 30.8 mg, 80% yield;  $^1\text{H}$  NMR (400 MHz,  $\text{CDCl}_3$ )  $\delta$  8.71 (d,  $J = 8.2$  Hz, 1H), 8.51 (s, 1H), 7.90 (d,  $J = 7.8$  Hz, 1H), 7.81 (d,  $J = 8.1$  Hz, 1H), 7.77 – 7.57 (m, 4H), 7.46 (d,  $J = 8.0$  Hz, 1H), 2.65 (s, 3H);  $^{13}\text{C}$  NMR (151 MHz,  $\text{CDCl}_3$ )  $\delta$  136.40, 132.33, 130.46, 130.15, 130.10, 128.65, 128.53, 128.43, 126.86, 126.54, 126.45, 126.09, 122.75, 122.54, 22.27. The analytical data match those reported in the literature<sup>6</sup>.

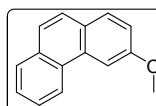

**3-methoxyphenanthrene (C).** Substrate **9a** was irradiated for 2.5 h, 22.9 mg, 55% yield; Substrate **10a** was irradiated for 2.5 h, 27.1 mg, 65% yield;  $^1\text{H}$  NMR (400 MHz,  $\text{CDCl}_3$ )  $\delta$  8.55 (d,  $J = 8.0$  Hz, 1H), 7.99 (d,  $J = 2.3$  Hz, 1H), 7.85 – 7.79 (m, 1H), 7.74 (d,  $J = 8.7$  Hz, 1H), 7.62 (d,  $J = 8.8$  Hz, 1H), 7.60 – 7.49 (m, 3H), 7.19 (dd,  $J = 8.6, 2.3$  Hz, 1H), 3.95 (s, 3H);  $^{13}\text{C}$  NMR (151 MHz,  $\text{CDCl}_3$ )  $\delta$  158.55, 132.51, 131.70, 130.08, 129.85, 128.71, 126.84, 126.72, 126.67, 126.22, 124.65, 122.77, 116.81, 104.04, 55.55. The analytical data match those reported in the literature<sup>5</sup>.

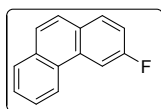

**3-fluorophenanthrene (D).** Substrate **11a** was irradiated for 1.2 h, 21.6 mg, 55% yield;  $^1\text{H}$  NMR (400 MHz,  $\text{CDCl}_3$ )  $\delta$  8.61 – 8.51 (m, 1H), 8.30 (dd,  $J = 11.1, 2.4$  Hz, 1H), 7.96 – 7.83 (m, 2H), 7.77 – 7.59 (m, 4H), 7.36 (td,  $J = 8.5, 2.5$  Hz, 1H);  $^{13}\text{C}$  NMR (151 MHz,  $\text{CDCl}_3$ )  $\delta$  161.71 (d,  $J = 245.3$  Hz), 132.33, 131.93 (d,  $J = 8.4$  Hz), 130.68 (d,  $J = 8.9$  Hz), 129.81 (d,  $J = 4.3$  Hz), 128.81 (d,  $J = 1.4$  Hz), 128.75, 127.29, 126.73, 126.42, 126.26 (d,  $J = 2.6$  Hz), 122.97, 115.72 (d,  $J = 23.9$  Hz), 107.89 (d,  $J = 22.1$  Hz). The analytical data match those reported in the literature<sup>7</sup>.

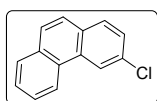

**3-chlorophenanthrene (E).** Substrate **12a** was irradiated for 1.2 h, 30.5 mg, 72% yield;  $^1\text{H}$  NMR (400 MHz,  $\text{CDCl}_3$ )  $\delta$  8.65 (s, 1H), 8.60 (d,  $J = 8.0$  Hz, 1H), 7.90 (d,  $J = 7.5$  Hz, 1H), 7.82 (d,  $J = 8.5$  Hz, 1H), 7.77 – 7.59 (m, 4H), 7.55 (d,  $J = 8.4$  Hz, 1H);  $^{13}\text{C}$  NMR (151 MHz,  $\text{CDCl}_3$ )  $\delta$  132.70, 132.36, 131.52, 130.42, 130.06, 129.44, 128.77, 127.37, 127.34, 127.22, 127.01, 126.35, 122.83, 122.52. The analytical data match those reported in the literature<sup>5</sup>.

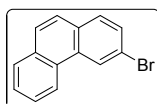

**3-bromophenanthrene (F).** White solid, m.p. = 81.2-82.8 °C; Substrate **13a** was irradiated for 2.5 h, 15.4 mg, 30% yield;  $^1\text{H}$  NMR (400 MHz,  $\text{CDCl}_3$ )  $\delta$  8.81 (d,  $J = 1.4$  Hz, 1H), 8.58 (d,  $J = 8.0$  Hz, 1H), 7.93 – 7.86 (m, 1H), 7.74 (dd,  $J = 8.7, 2.3$  Hz, 2H), 7.71 – 7.59 (m, 4H);  $^{13}\text{C}$  NMR (151 MHz,  $\text{CDCl}_3$ )  $\delta$  132.31, 131.86, 130.65, 130.17, 129.82, 129.31, 128.74, 127.52, 127.33, 127.02, 126.37, 125.66, 122.80, 120.95; GC-MS (EI): 258.0, 256.0, 176.1, 150.0, 98.0, 88.1, 74.1. The analytical data match those reported in the literature<sup>8</sup>.

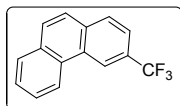

**3-(trifluoromethyl)phenanthrene (G).** White solid, m.p. = 54.0-55.8°C; Substrate **14a** was irradiated for 1.5 h, 34.5 mg, 70% yield;  $^1\text{H}$  NMR (400 MHz,  $\text{CDCl}_3$ )  $\delta$  8.96 (s, 1H), 8.71 (d,  $J = 8.2$  Hz, 1H), 7.99 (d,  $J = 8.3$  Hz, 1H), 7.93 (d,  $J = 7.8$  Hz, 1H), 7.86 (d,  $J = 8.9$  Hz, 1H), 7.78 (t,  $J = 9.6$  Hz, 2H), 7.73 (t,  $J = 7.3$  Hz, 1H), 7.67 (t,  $J = 7.3$  Hz, 1H);  $^{13}\text{C}$  NMR (151 MHz,  $\text{CDCl}_3$ )  $\delta$  133.97, 132.36, 130.19, 129.89, 129.44, 129.40, 128.95, 128.37 (q,  $J = 32.1$  Hz), 127.55, 127.42, 126.27, 124.76 (q,  $J = 272.2$  Hz), 122.81, 122.61 (q,  $J = 3.3$  Hz), 120.35 (q,  $J = 4.4$  Hz); GC-MS (EI): 246.1, 227.1, 196.1, 176.1, 123.1, 98.1; HRMS (ESI): calc. for  $\text{C}_{15}\text{H}_{10}\text{F}_3$   $[\text{M}+\text{H}]^+$ : 247.0729, found:247.0734.

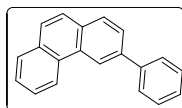

**3-phenylphenanthrene (H).** Substrate **15a** was irradiated for 2.5 h, 28.5 mg, 56% yield;  $^1\text{H}$  NMR (400 MHz,  $\text{CDCl}_3$ )  $\delta$  8.94 (s, 1H), 8.82 (d,  $J = 8.2$  Hz, 1H), 7.97 (dd,  $J = 16.2, 8.0$  Hz, 2H), 7.89 (d,  $J = 8.2$  Hz, 1H), 7.84 (d,  $J = 7.7$  Hz, 2H), 7.83 – 7.76 (m, 2H), 7.69 (dt,  $J = 14.6, 7.1$  Hz, 2H), 7.58 (t,  $J = 7.6$  Hz, 2H), 7.47 (t,  $J = 7.4$  Hz, 1H);  $^{13}\text{C}$  NMR (151 MHz,  $\text{CDCl}_3$ )  $\delta$  141.65, 139.49, 132.41, 131.29, 130.64, 130.51, 129.15, 129.04, 128.80, 127.73, 127.53, 127.14, 126.81, 126.73, 126.69, 126.12, 122.79, 121.24. The analytical data match those reported in the literature<sup>5</sup>.

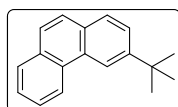

**3-(tert-butyl)phenanthrene (I).** White solid, m.p. = 54.0-55.0°C; Substrate **16a** was irradiated for 1.2 h, 39.4 mg, 84% yield;  $^1\text{H}$  NMR (400 MHz,  $\text{CDCl}_3$ )  $\delta$  8.76 (d,  $J = 8.2$  Hz, 1H), 8.73 (d,  $J = 1.1$  Hz, 1H), 7.91 (d,  $J = 7.7$  Hz, 1H), 7.87 (d,  $J = 8.4$  Hz, 1H), 7.78 – 7.65 (m, 4H), 7.61 (dd,  $J = 10.9, 3.9$  Hz, 1H), 1.54 (s, 9H);  $^{13}\text{C}$  NMR (151

MHz, CDCl<sub>3</sub>)  $\delta$  149.48, 132.35, 130.58, 130.09, 130.02, 128.75, 128.36, 126.67, 126.46, 126.44, 126.38, 125.06, 122.64, 118.38, 35.37, 31.69; GC-MS (EI): 234.2, 219.2, 202.1, 191.1, 178.1, 95.5. The analytical data match those reported in the literature<sup>9</sup>.

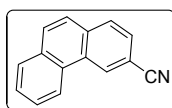

**phenanthrene-3-carbonitrile (J).** Substrate **17a** was irradiated for 2.0 h, 22.4 mg, 55% yield; <sup>1</sup>H NMR (400 MHz, CDCl<sub>3</sub>)  $\delta$  8.91 (s, 1H), 8.55 (d,  $J$  = 7.8 Hz, 1H), 8.05 – 7.81 (m, 3H), 7.80 – 7.60 (m, 4H); <sup>13</sup>C NMR (151 MHz, CDCl<sub>3</sub>)  $\delta$  134.27, 132.24, 130.41, 129.97, 129.51, 129.35, 128.96, 128.21, 127.97, 127.89, 127.76, 126.09, 122.60, 119.65, 109.78. The analytical data match those reported in the literature<sup>10</sup>.

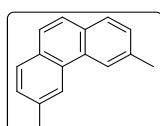

**3,6-dimethylphenanthrene (K).** Substrate **18a** was irradiated for 1.2 h, 27.6 mg, 67% yield; <sup>1</sup>H NMR (400 MHz, CDCl<sub>3</sub>)  $\delta$  8.49 (s, 2H), 7.79 (d,  $J$  = 8.1 Hz, 2H), 7.66 (s, 2H), 7.43 (dd,  $J$  = 8.1, 1.0 Hz, 2H), 2.65 (s, 6H); <sup>13</sup>C NMR (151 MHz, CDCl<sub>3</sub>)  $\delta$  136.13, 130.26, 130.19, 128.48, 128.28, 125.90, 122.49, 22.25. The analytical data match those reported in the literature<sup>11</sup>.

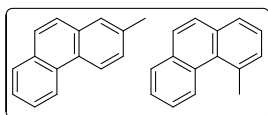

**2-methylphenanthrene (L) and 4-methylphenanthrene (L').** Substrate **19a** was irradiated for 2.0 h, 29.6 mg, the total yield of both the regioisomer is 77%, the ratio of **J/J'** is 4/3; <sup>1</sup>H NMR (400 MHz, CDCl<sub>3</sub>)  $\delta$  8.96 (d,  $J$  = 8.2 Hz, 0.60H), 8.68 (d,  $J$  = 8.2 Hz, 1H), 8.60 (d,  $J$  = 8.4 Hz, 1H), 7.95 (dd,  $J$  = 7.6, 1.7 Hz, 0.60H), 7.93 – 7.88 (m, 1H), 7.84 – 7.79 (m, 0.6H), 7.77 – 7.47 (m, 9.6H), 3.19 (s, 1.8H), 2.59 (s, 3H); <sup>13</sup>C NMR (151 MHz, CDCl<sub>3</sub>)  $\delta$  136.43, 135.66, 133.86, 133.61, 132.32, 131.84, 131.80, 131.36, 130.47, 130.21, 128.84, 128.65, 128.46, 128.26, 128.14, 127.65, 127.58, 127.22, 127.04, 126.80, 126.60, 126.24, 126.01, 125.91, 125.70, 122.68, 122.58, 27.55, 21.60. The analytical data match those reported in the literature<sup>10</sup>.

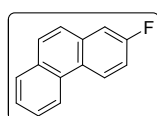

**2-fluorophenanthrene (M).** <sup>1</sup>H NMR (400 MHz, CDCl<sub>3</sub>)  $\delta$  8.66 (dd,  $J$  = 9.1, 5.4 Hz, 1H), 8.62 (d,  $J$  = 8.2 Hz, 1H), 7.90 (d,  $J$  = 7.6 Hz, 1H), 7.78 (d,  $J$  = 8.9 Hz, 1H), 7.71 – 7.64 (m, 2H), 7.60 (dd,  $J$  = 10.9, 4.0 Hz, 1H), 7.53 (dd,  $J$  = 9.4, 2.7 Hz, 1H), 7.40 (td,  $J$  = 8.7, 2.7 Hz, 1H); <sup>13</sup>C NMR (101 MHz, CDCl<sub>3</sub>)  $\delta$  161.45 (d,  $J$  = 246.1 Hz), 133.57 (d,  $J$  = 8.8 Hz), 131.65 (d,  $J$  = 1.2 Hz), 130.25, 128.85, 128.38, 127.13, 127.05 (d,  $J$  = 2.0 Hz), 126.55 (d,  $J$  = 0.5 Hz), 126.27 (d,  $J$  = 3.7 Hz), 125.11 (d,  $J$  = 8.8 Hz), 122.58, 115.61 (d,  $J$  = 23.7 Hz), 112.70 (d,  $J$  = 20.5 Hz). The analytical data match those reported in the literature<sup>7</sup>.

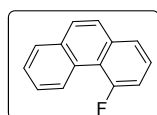

**4-fluorophenanthrene (M').** Substrate **20a** was irradiated for 1.0 h, the total weight of **M** and **M'** is 29.1 mg, the total yield is 74 %, the ratio of **M/M'** is 8/1; <sup>1</sup>H NMR (400 MHz, CDCl<sub>3</sub>)  $\delta$  9.21 – 9.07 (m, 1H), 7.92 (dd,  $J$  = 7.8, 1.5 Hz, 1H), 7.82 – 7.60 (m, 5H), 7.54 (td,  $J$  = 7.9, 4.9 Hz, 1H), 7.37 (ddd,  $J$  = 14.2, 7.8, 1.2 Hz, 1H); <sup>13</sup>C NMR (151 MHz, CDCl<sub>3</sub>)  $\delta$  161.63 (d,  $J$  = 253.0 Hz), 134.92 (d,  $J$  = 4.6 Hz), 132.65, 128.51 (d,  $J$  = 5.2 Hz), 128.41 (d,  $J$  = 1.1 Hz), 127.93, 127.77, 127.28 (d,  $J$  = 2.4 Hz), 126.94 (d,  $J$  = 2.1 Hz), 126.73 (d,  $J$  = 10.1 Hz), 126.59 (d,  $J$  = 3.1 Hz), 124.65 (d,  $J$  = 3.6 Hz), 119.66 (d,  $J$  = 9.2 Hz), 113.47 (d,  $J$  = 24.9 Hz). The analytical data match those reported in the literature<sup>12</sup>.

**1-methylphenanthrene (N).** <sup>1</sup>H NMR (400 MHz, CDCl<sub>3</sub>)  $\delta$  8.72 (d,  $J$  = 8.3 Hz, 1H), 8.60 (d,  $J$  =

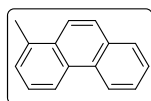

8.4 Hz, 1H), 7.97 (d,  $J = 9.1$  Hz, 1H), 7.94 – 7.88 (m, 1H), 7.80 (d,  $J = 9.1$  Hz, 1H), 7.72 – 7.52 (m, 3H), 7.46 (d,  $J = 7.1$  Hz, 1H), 2.78 (s, 3H);  $^{13}\text{C}$  NMR (151 MHz,  $\text{CDCl}_3$ )  $\delta$  135.02, 131.78, 130.93, 130.78, 130.46, 128.61, 127.90, 126.82, 126.68, 126.55, 126.28, 123.08, 123.00, 121.00, 20.12. The analytical data match those reported in the literature<sup>13</sup>.

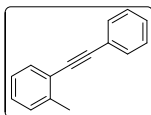

**1-methyl-2-(phenylethynyl)benzene (N')**. Substrate **21a** was irradiated for 2.3 h, the total weight of **N** and **N'** is 17.3 mg, the total yield is 45%, the ratio of **N/N'** is 3/5;  $^1\text{H}$  NMR (400 MHz,  $\text{CDCl}_3$ )  $\delta$  7.60 – 7.52 (m, 2H), 7.50 (d,  $J = 7.4$  Hz, 1H), 7.40 – 7.31 (m, 3H), 7.24 (d,  $J = 3.9$  Hz, 2H), 7.18 (dq,  $J = 8.6, 4.1$  Hz, 1H), 2.53 (s, 3H);  $^{13}\text{C}$  NMR (151 MHz,  $\text{CDCl}_3$ )  $\delta$  140.33, 131.97, 131.65, 129.60, 128.49, 128.44, 128.32, 125.72, 123.67, 123.14, 93.46, 88.45, 20.90. The analytical data match those reported in the literature<sup>14</sup>.

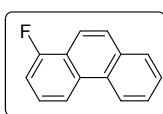

**1-fluorophenanthrene (O)**.  $^1\text{H}$  NMR (400 MHz,  $\text{CDCl}_3$ )  $\delta$  8.66 (d,  $J = 8.1$  Hz, 1H), 8.46 (d,  $J = 8.4$  Hz, 1H), 8.05 (d,  $J = 9.1$  Hz, 1H), 7.98 – 7.89 (m, 1H), 7.81 (d,  $J = 9.1$  Hz, 1H), 7.74 – 7.54 (m, 3H), 7.30 (dd,  $J = 9.7, 8.2$  Hz, 1H);  $^{13}\text{C}$  NMR (151 MHz,  $\text{CDCl}_3$ )  $\delta$  159.43 (d,  $J = 249.9$  Hz), 132.29 (d,  $J = 4.3$  Hz), 132.21, 129.77 (d,  $J = 2.6$  Hz), 128.93, 127.53 (d,  $J = 1.9$  Hz), 127.26, 127.15, 126.62 (d,  $J = 8.7$  Hz), 123.16, 121.70 (d,  $J = 15.4$  Hz), 118.66 (d,  $J = 7.0$  Hz), 118.54 (d,  $J = 3.8$  Hz), 111.16 (d,  $J = 20.3$  Hz). The analytical data match those reported in the literature<sup>15</sup>.

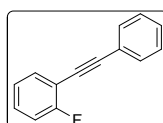

**1-fluoro-2-(phenylethynyl)benzene (O')**. Substrate **22a** was irradiated for 1.0 h, the total weight of **O** and **O'** is 36.5 mg, the total yield is 93%, the ratio of **O/O'** is 3/1;  $^1\text{H}$  NMR (400 MHz,  $\text{CDCl}_3$ )  $\delta$  7.65 – 7.49 (m, 3H), 7.43 – 7.28 (m, 4H), 7.20 – 7.06 (m, 2H);  $^{13}\text{C}$  NMR (151 MHz,  $\text{CDCl}_3$ )  $\delta$  162.74 (d,  $J = 251.6$  Hz), 133.56, 131.82, 130.09 (d,  $J = 7.9$  Hz), 128.72, 128.49, 124.09 (d,  $J = 3.7$  Hz), 123.00, 115.65 (d,  $J = 20.9$  Hz), 112.02 (d,  $J = 15.7$  Hz), 94.53 (d,  $J = 3.2$  Hz), 82.80. The analytical data match those reported in the literature<sup>14</sup>.

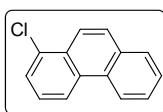

**1-chlorophenanthrene (P)**.  $^1\text{H}$  NMR (400 MHz,  $\text{CDCl}_3$ )  $\delta$  8.68 (d,  $J = 8.1$  Hz, 1H), 8.64 (d,  $J = 8.3$  Hz, 1H), 8.24 (d,  $J = 9.2$  Hz, 1H), 7.93 (d,  $J = 8.0$  Hz, 1H), 7.86 (d,  $J = 9.2$  Hz, 1H), 7.67 (tdd,  $J = 15.8, 10.7, 5.2$  Hz, 3H), 7.57 (t,  $J = 8.0$  Hz, 1H);  $^{13}\text{C}$  NMR (151 MHz,  $\text{CDCl}_3$ )  $\delta$  132.85, 132.04, 132.03, 130.07, 129.47, 128.86, 128.36, 127.33, 127.22, 127.21, 126.59, 123.11, 122.65, 121.78. The analytical data match those reported in the literature<sup>5</sup>.

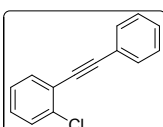

**1-chloro-2-(phenylethynyl)benzene (P')**. Substrate **23a** was irradiated for 1.8 h, the total weight of **P** and **P'** is 29.7 mg, the total yield is 70%, the ratio of **P/P'** is 6/5;  $^1\text{H}$  NMR (400 MHz,  $\text{CDCl}_3$ )  $\delta$  7.61 – 7.53 (m, 3H), 7.45 – 7.40 (m, 1H), 7.38 – 7.33 (m, 3H), 7.28 – 7.20 (m, 2H);  $^{13}\text{C}$  NMR (151 MHz,  $\text{CDCl}_3$ )  $\delta$  136.05, 133.35, 131.87, 129.43, 129.39, 128.78, 128.51, 126.59, 123.33, 123.02, 94.65, 86.29. The analytical data match those reported in the literature<sup>16</sup>.

**1-(trifluoromethyl)phenanthrene (Q)**. White solid, m.p. = 55.2–56.7°C;  $^1\text{H}$  NMR (400 MHz,

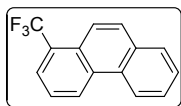

$\text{CDCl}_3$ )  $\delta$  8.93 (d,  $J = 8.4$  Hz, 1H), 8.71 (d,  $J = 8.3$  Hz, 1H), 8.12 (dd,  $J = 9.3$ , 1.9 Hz, 1H), 8.02 – 7.87 (m, 3H), 7.76 – 7.63 (m, 3H);  $^{13}\text{C}$  NMR (151 MHz,  $\text{CDCl}_3$ )  $\delta$  131.66, 131.37, 130.04, 129.03, 128.81, 128.46, 127.53, 127.41, 127.05, 126.87 (q,  $J = 29.9$  Hz), 125.26, 124.99 (q,  $J = 273.8$  Hz), 124.96 (q,  $J = 6.0$  Hz), 122.95, 122.24 (q,  $J = 2.7$  Hz); GC-MS (EI): 246.1, 225.1, 196.1, 176.1, 150.0, 69.0; HRMS (ESI): calc. for  $\text{C}_{15}\text{H}_{10}\text{F}_3$   $[\text{M}+\text{H}]^+$ : 247.0729, found:247.0726.

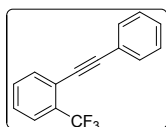

**1-(phenylethynyl)-2-(trifluoromethyl)benzene(Q')**. Substrate **24a** was irradiated for 2.0 h, the total weight of **Q** and **Q'** is 24.6 mg, the total yield is 50%, the ratio of **Q/Q'** is 1/7;  $^1\text{H}$  NMR (400 MHz,  $\text{CDCl}_3$ )  $\delta$  7.69 (t,  $J = 7.4$  Hz, 2H), 7.57 (dd,  $J = 6.5$ , 3.0 Hz, 2H), 7.52 (t,  $J = 7.7$  Hz, 1H), 7.46 – 7.34 (m, 4H);  $^{13}\text{C}$  NMR (151 MHz,  $\text{CDCl}_3$ )  $\delta$  133.84, 131.84, 131.65 (q,  $J = 30.3$  Hz), 131.54, 128.97, 128.54, 128.06, 126.03 (q,  $J = 5.0$  Hz), 123.77 (d,  $J = 273.4$  Hz), 122.87, 121.71 (q,  $J = 2.0$  Hz), 95.07, 85.50. The analytical data match those reported in the literature<sup>14</sup>.

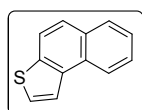

**naphtho[2,1-b]thiophene (R)**. Substrate **25a** was irradiated for 2.5 h, 12.9 mg, 35% yield; Substrate **26a** was irradiated for 3.0 h, 18.4 mg, 50% yield;  $^1\text{H}$  NMR (400 MHz,  $\text{CDCl}_3$ )  $\delta$  8.35 (d,  $J = 8.2$  Hz, 1H), 8.04 – 7.87 (m, 3H), 7.76 (d,  $J = 8.8$  Hz, 1H), 7.59 (tt,  $J = 14.8$ , 7.2 Hz, 3H);  $^{13}\text{C}$  NMR (151 MHz,  $\text{CDCl}_3$ )  $\delta$  137.39, 135.94, 130.98, 129.36, 128.56, 126.48, 125.84, 125.30, 125.07, 123.62, 122.04, 120.70. The analytical data match those reported in the literature<sup>5</sup>.

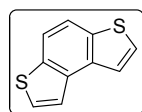

**benzo[1,2-b:4,3-b']dithiophene (S)**. White solid, m.p. = 112.3–113.8 °C; Substrate **27a** was irradiated for 2.5 h, 22.1 mg, 58% yield;  $^1\text{H}$  NMR (400 MHz,  $\text{CDCl}_3$ )  $\delta$  7.83 (s, 2H), 7.72 (d,  $J = 5.4$  Hz, 2H), 7.57 (d,  $J = 5.4$  Hz, 2H);  $^{13}\text{C}$  NMR (151 MHz,  $\text{CDCl}_3$ )  $\delta$  136.54, 134.75, 126.61, 122.04, 118.88; GC-MS (EI): 190.0, 158.0, 145.0, 114.1, 95.0; HRMS (ESI): calc. for  $\text{C}_{10}\text{H}_6\text{NaS}_2$   $[\text{M}+\text{Na}]^+$ : 212.9803, found:212.9798.

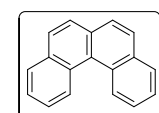

**benzo[c]phenanthrene (T)**. Substrate **28a** was irradiated for 3.0 h, 16.9 mg, 37% yield;  $^1\text{H}$  NMR (400 MHz,  $\text{CDCl}_3$ )  $\delta$  9.16 (d,  $J = 8.4$  Hz, 2H), 8.04 (d,  $J = 7.8$  Hz, 2H), 7.92 (d,  $J = 8.5$  Hz, 2H), 7.85 (d,  $J = 8.5$  Hz, 2H), 7.68 (dt,  $J = 14.7$ , 7.1 Hz, 4H);  $^{13}\text{C}$  NMR (151 MHz,  $\text{CDCl}_3$ )  $\delta$  133.62, 131.11, 130.43, 128.68, 128.03, 127.60, 127.47, 126.98, 126.26, 125.98. The analytical data match those reported in the literature<sup>6</sup>.

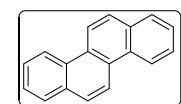

**chrysene (U)**. Substrate **29a** was irradiated for 2.5 h, 11.5 mg, 25% yield;  $^1\text{H}$  NMR (400 MHz,  $\text{CDCl}_3$ )  $\delta$  8.80 (d,  $J = 8.4$  Hz, 2H), 8.74 (d,  $J = 9.0$  Hz, 2H), 8.02 (t,  $J = 7.6$  Hz, 4H), 7.77 – 7.69 (m, 2H), 7.65 (dd,  $J = 10.9$ , 4.0 Hz, 2H);  $^{13}\text{C}$  NMR (151 MHz,  $\text{CDCl}_3$ )  $\delta$  132.31, 130.70, 128.71, 128.36, 127.49, 126.82, 126.52, 123.30, 121.36. The analytical data match those reported in the literature<sup>6</sup>.

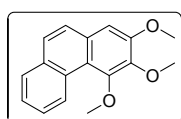

**2,3,4-trimethoxyphenanthrene (V)**. Substrate **30a** (0.31g, 0.8mmol) was irradiated for 3.5 h, 0.11g, 50% yield;  $^1\text{H}$  NMR (600 MHz,  $\text{CDCl}_3$ )  $\delta$  9.52 (d,  $J = 8.6$  Hz, 1H), 7.86 (d,  $J = 7.7$  Hz, 1H), 7.73 – 7.59 (m, 3H), 7.55 (dd,  $J = 10.8$ , 3.9 Hz, 1H), 7.11 (s, 1H), 4.11 – 3.98 (m, 9H);  $^{13}\text{C}$  NMR (151 MHz,  $\text{CDCl}_3$ )  $\delta$  152.64,

152.55, 142.93, 131.93, 130.27, 129.99, 128.55, 127.29, 126.86, 126.84, 126.60, 125.65, 119.03, 105.30, 61.42, 60.42, 55.98. The analytical data match those reported in the literature<sup>17</sup>.

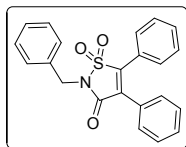

**2-benzyl-4,5-diphenylisothiazol-3(2H)-one 1,1-dioxide (2c).** White solid, m.p. = 164.5-165.9°C. Substrate **2a** was irradiated for 0.2 h; <sup>1</sup>H NMR (400 MHz, CDCl<sub>3</sub>) δ 7.58 – 7.50 (m, 4H), 7.49 – 7.31 (m, 11H), 4.91 (s, 2H); <sup>13</sup>C NMR (151 MHz, CDCl<sub>3</sub>) δ 160.38, 144.13, 134.50, 132.79, 131.62, 130.58, 130.35, 129.56, 129.45, 129.10, 128.87, 128.86, 128.51, 127.12, 124.92, 43.64; GC-MS (EI): 375.1, 311.2, 282.1, 234.1, 178.1, 91.1. HRMS (ESI): calc. for C<sub>22</sub>H<sub>15</sub>NNaO<sub>3</sub>S [M+Na]<sup>+</sup>: 398.0821, found: 398.0817.

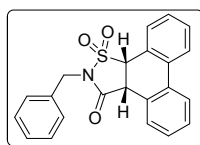

**(3aR,11bS)-2-benzyl-3a,11b-dihydrophenanthro[9,10-d]isothiazol-3(2H)-one 1,1-dioxide(2d).** White solid, m.p. = 143.9-145.2°C; Substrate **2a** was irradiated for 0.2 h. <sup>1</sup>H NMR (400 MHz, CDCl<sub>3</sub>) δ 7.98 (dd, *J* = 15.9, 7.8 Hz, 2H), 7.68 (d, *J* = 7.8 Hz, 1H), 7.60 – 7.51 (m, 2H), 7.45 – 7.39 (m, 2H), 7.38 – 7.26 (m, 6H), 5.07 (d, *J* = 8.5 Hz, 1H), 4.83 – 4.73 (m, 2H), 4.61 (d, *J* = 8.5 Hz, 1H); <sup>13</sup>C NMR (151 MHz, CDCl<sub>3</sub>) δ 167.20, 134.57, 134.16, 131.47, 131.39, 131.00, 129.28, 129.14, 128.85, 128.77, 128.53, 128.28, 127.11, 125.45, 124.81, 124.30, 120.44, 63.00, 44.62, 44.02; GC-MS (EI): 311.1, 205.0, 177.1, 151.0, 91.1; HRMS (ESI): calc. for C<sub>22</sub>H<sub>15</sub>NNaO<sub>3</sub>S [M+Na]<sup>+</sup>: 398.0821, found: 398.0819.

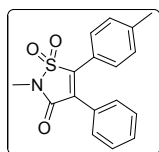

**2-methyl-4-phenyl-5-(p-tolyl)isothiazol-3(2H)-one 1,1-dioxide (7c).** White solid, m.p. = 173.0-174.2°C. Substrate **14a** was irradiated for 0.2 h; <sup>1</sup>H NMR (600 MHz, CDCl<sub>3</sub>) δ 7.45 – 7.40 (m, 3H), 7.40 – 7.36 (m, 4H), 7.18 (d, *J* = 8.1 Hz, 2H), 3.27 (s, 3H), 2.37 (s, 3H); <sup>13</sup>C NMR (151 MHz, CDCl<sub>3</sub>) δ 160.44, 144.32, 142.42, 132.22, 130.46, 130.24, 130.21, 129.41, 128.91, 127.45, 121.91, 24.27, 21.76; GC-MS (EI): 313.1, 298.0, 248.0, 192.1, 132.1, 119.0; HRMS (ESI): calc. for C<sub>17</sub>H<sub>15</sub>NNaO<sub>3</sub>S [M+Na]<sup>+</sup>: 336.0665, found: 336.0669.

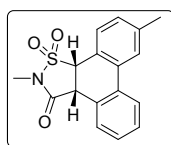

**(3aR,11bS)-2,9-dimethyl-3a,11b-dihydrophenanthro[9,10-d]isothiazol-3(2H)-one 1,1-dioxide(7d).** White solid, m.p. = 207.2-208.7°C; Substrate **7a** was irradiated for 0.2h. <sup>1</sup>H NMR (400 MHz, CDCl<sub>3</sub>) δ 7.96 (d, *J* = 7.8 Hz, 1H), 7.81 (s, 1H), 7.73 (d, *J* = 7.7 Hz, 1H), 7.47 – 7.38 (m, 2H), 7.34 (t, *J* = 7.2 Hz, 1H), 7.23 (d, *J* = 7.6 Hz, 1H), 5.01 (d, *J* = 8.7 Hz, 1H), 4.58 (d, *J* = 8.6 Hz, 1H), 3.13 (s, 3H), 2.47 (s, 3H); <sup>13</sup>C NMR (151 MHz, CDCl<sub>3</sub>) δ 167.22, 141.46, 133.71, 131.41, 130.81, 129.67, 129.13, 129.01, 127.17, 125.60, 125.49, 124.08, 117.33, 62.47, 44.74, 25.10, 21.88; GC-MS (EI): 249.1, 219.1, 191.1, 165.1, 123.6, 94.7; HRMS (ESI): calc. for C<sub>17</sub>H<sub>15</sub>NNaO<sub>3</sub>S [M+Na]<sup>+</sup>: 336.0665, found: 336.0673.

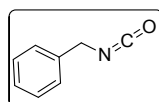

**(isocyanatomethyl)benzene (2e).** Colorless oil. <sup>1</sup>H NMR (400 MHz, CDCl<sub>3</sub>) δ 7.43 – 7.36 (m, 2H), 7.33 (dd, *J* = 6.9, 4.3 Hz, 3H), 4.50 (s, 2H); <sup>13</sup>C NMR (151 MHz, CDCl<sub>3</sub>) δ 137.01, 128.96, 128.08, 126.84, 46.62; GC-MS (EI): 133.0, 104.0, 91.1, 77.0, 32.0, 28.1.

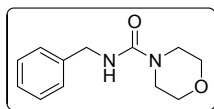

**N-benzylmorpholine-4-carboxamide (2f)**. Brown solid, m.p.= 138.2-139.8°C, 40% yield; <sup>1</sup>H NMR (400 MHz, CDCl<sub>3</sub>) δ 7.37 – 7.24 (m, 5H), 4.75 (s, 1H), 4.43 (d, *J* = 5.5 Hz, 2H), 3.72 – 3.62 (m, 4H), 3.40 – 3.31 (m, 4H); <sup>13</sup>C NMR (151 MHz, CDCl<sub>3</sub>) δ 156.78, 138.30, 127.80, 126.93, 126.55, 65.61, 44.11, 43.14; GC-MS (EI): 220.1, 189.1, 133.0, 91.1, 57.1; HRMS (ESI): calc. for C<sub>12</sub>H<sub>17</sub>N<sub>2</sub>O<sub>2</sub> [M+H]<sup>+</sup>= 221.1285; found: 221.1286. The analytical data match those reported in the literature<sup>18</sup>.

## 6. Reference

- 1K.Park,T.Palani,A.Pyo,S.Lee, *Tetrahedron Lett.*,2012,**53**, 733.
- 2K.Park,J. M.You,S.Jeon,S.Lee, *Eur. J. Org. Chem.*, 2013,**2013**, 1973.
- 3A. K.Ganguly,S. S.Alluri,D.Carocchia,D.Biswas,C. H.Wang,E.Kang,C.Strickland, *J. Med. Chem.*,2011,**54**,7176.
- 4a) D.Campolo,T.Arif,C.Borie,D.Mouysset,N.Vanthuyne,J. V.Naubron,M.Nechab, *Angew. Chem. Int. Ed.*,2014, **53**, 3227;b) B.Nyasse,L.Grehn,U.Ragnarsson,H.L.S.Maia,L.S.Monteiro,I.Leito,I.Koppel,J.Koppel, *J. Chem. Soc., Perkin Trans. 1* 1995, 2025.
- 5Y.Xia,Z.Liu,Q.Xiao,P.Qu,R.Ge,Y.Zhang,J.Wang, *Angew. Chem. Int. Ed.*,2012, **51**, 5714.
- 6M.Murai,N.Hosokawa,D.Roy,K.Takai, *Org. Lett.*,2014, **16**,4134.
- 7Y.Yamamoto,K.Matsui,M.Shibuya, *Chem. Eur. J.*, 2015,**21**, 7245.
- 8Q.Lefebvre,M.Jentsch,M.Rueping, *Beilstein J. Org. Chem.*,2013, **9**, 1883.
- 9D. W. Cameron and M. Mingin, *Aust. J. Chem.*, 1977, **30**, 859.
- 10H.Li,K. H.He,J.Liu,B. Q.Wang,K. Q.Zhao,P.Hu,Z. J. Shi, *Chem. Commun.*, 2012, **48**, 7028.
- 11S.Moussa,F.Aloui, B.Ben Hassine, *Synth. Commun.*, 2011, **41**, 1006.
- 12M. Yokota, D. Fujita and J. Ichikawa, *Org. Lett.*, 2007, **9**, 4639.
- 13W.Krasodomski,M. K.Luczynski,J.Wilamowski,J. J. Sepiol, *Tetrahedron*, 2003, **59**, 5677.
- 14M. Rubin, A. Trofimov and V. Gevorgyan, *J. Am. Chem. Soc.*, 2005, **127**, 10243.
- 15Z. Li and R. J. Twieg, *Chem. Eur. J.*, 2015, **21**,15534.
- 16M. R. Eberhard, Z. Wang and C. M. Jensen, *Chem. Commun.*, 2002, 818.
- 17V.Mamane,P.Hannen,A.Fürstner, *Chem. Eur. J.*, **2004**, 10, 4556 – 4575.
- 18A.Yagodkin,K.Löschcke,J.Weisell,A. Azhayev, *Tetrahedron*, **2010**, 66, 2210-2221.

## 7. <sup>1</sup>H and <sup>13</sup>C spectrum for all the related compounds

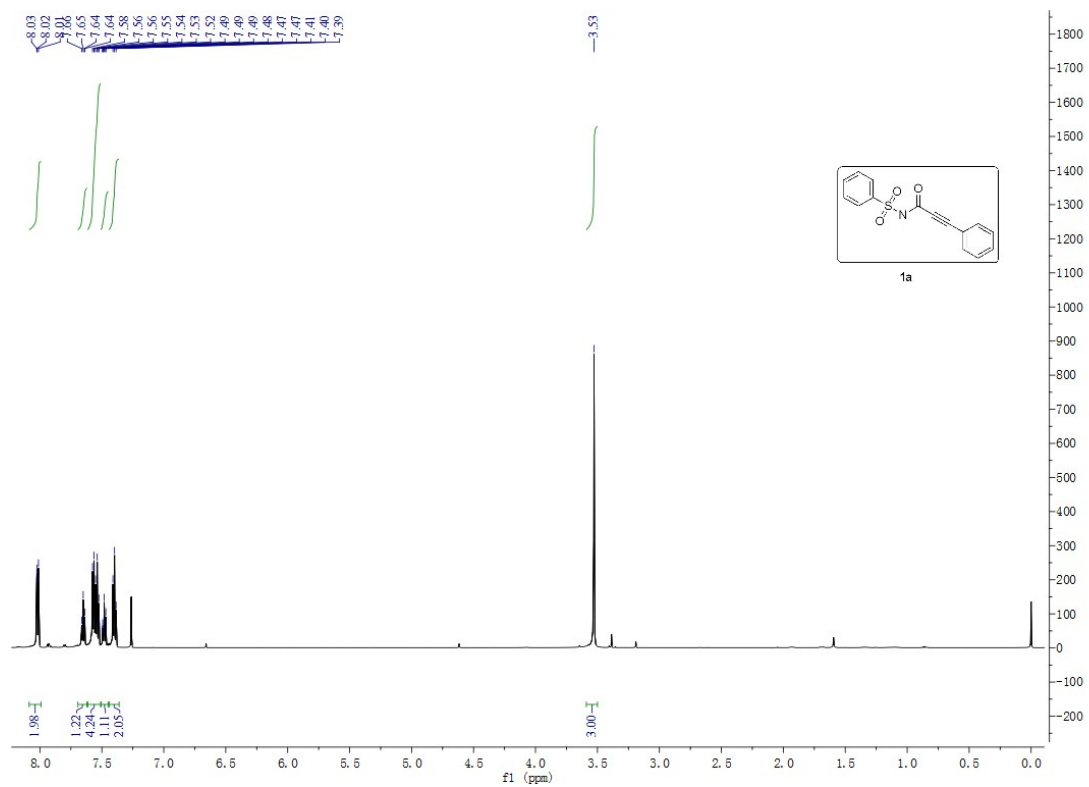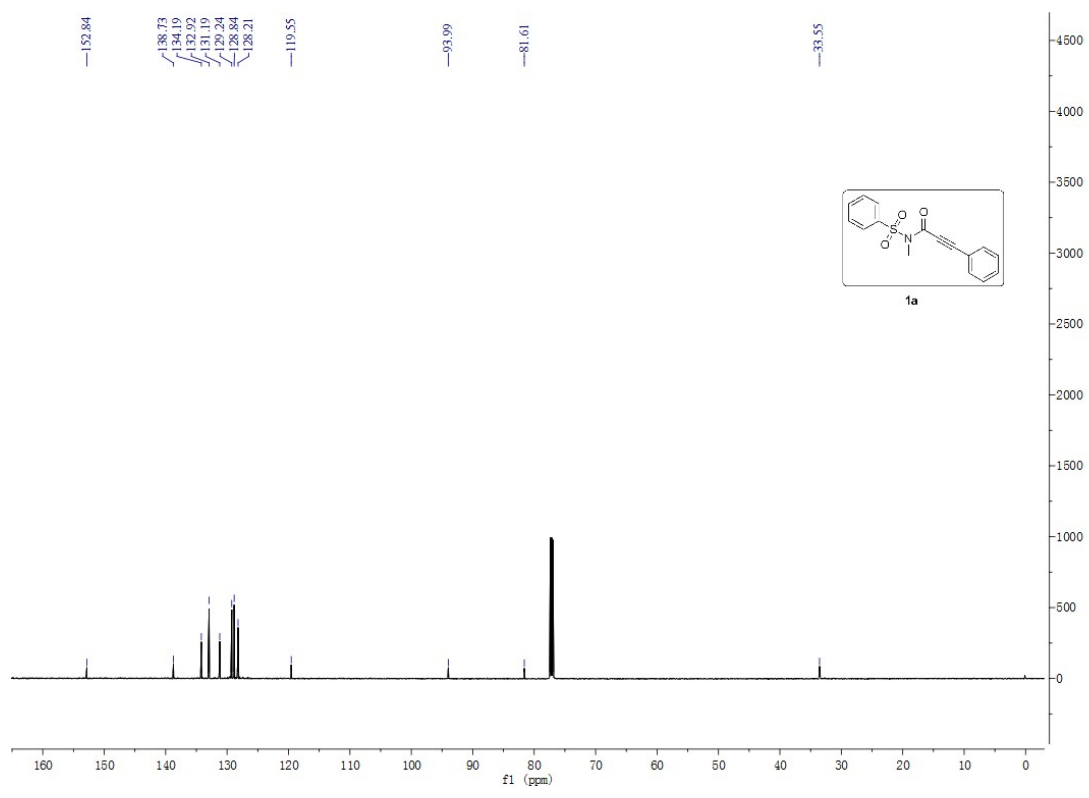



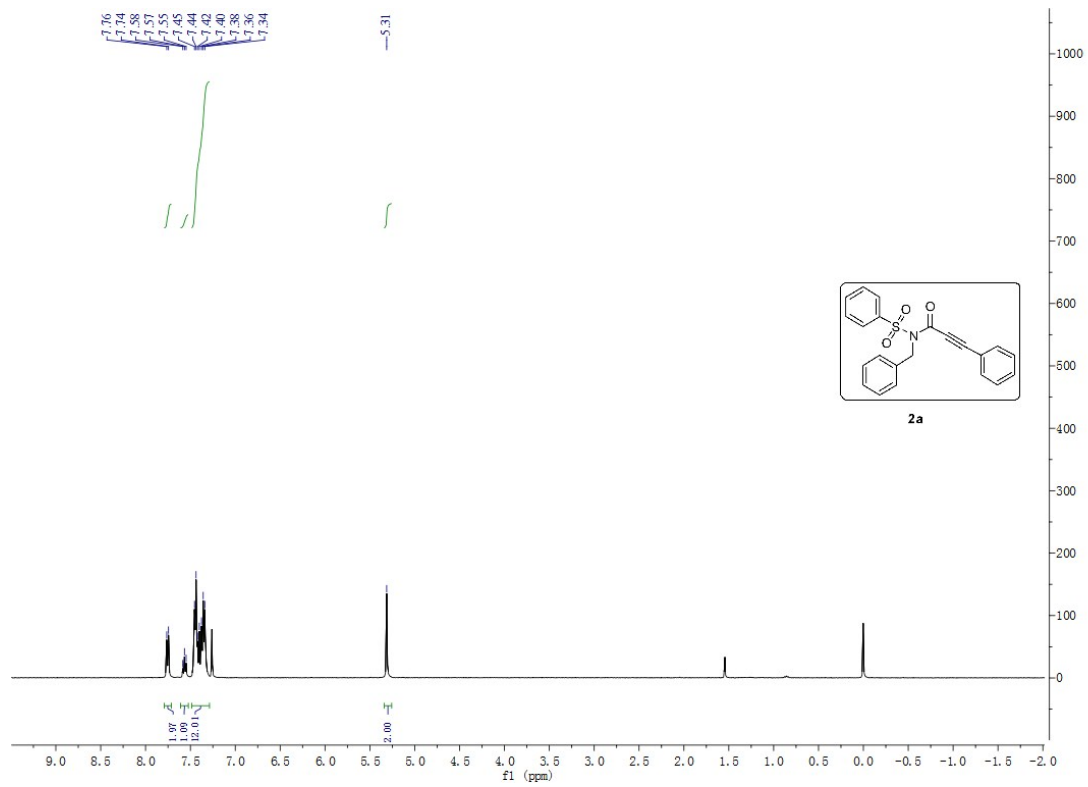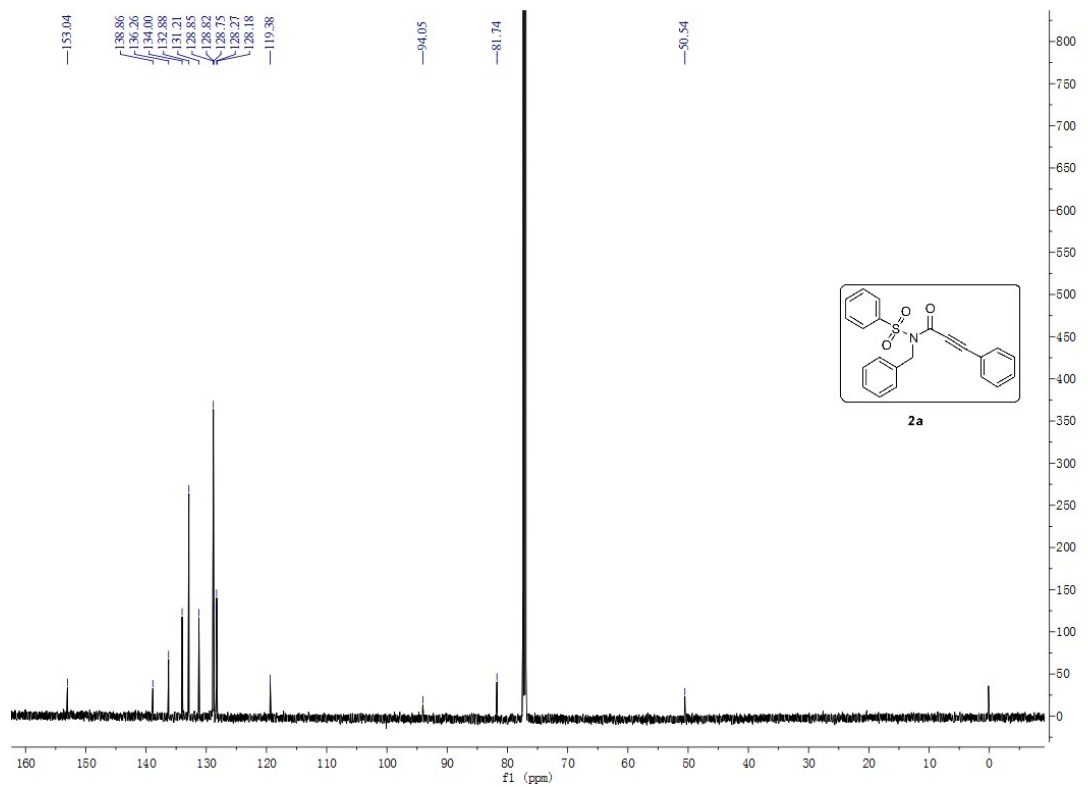

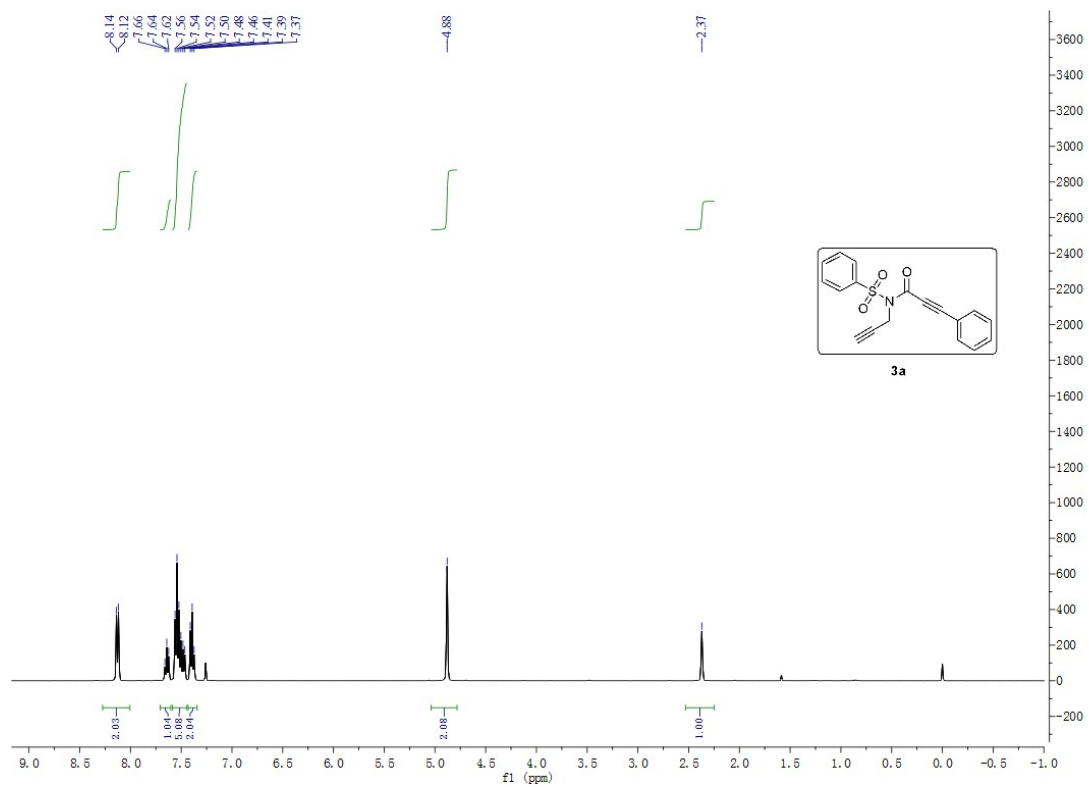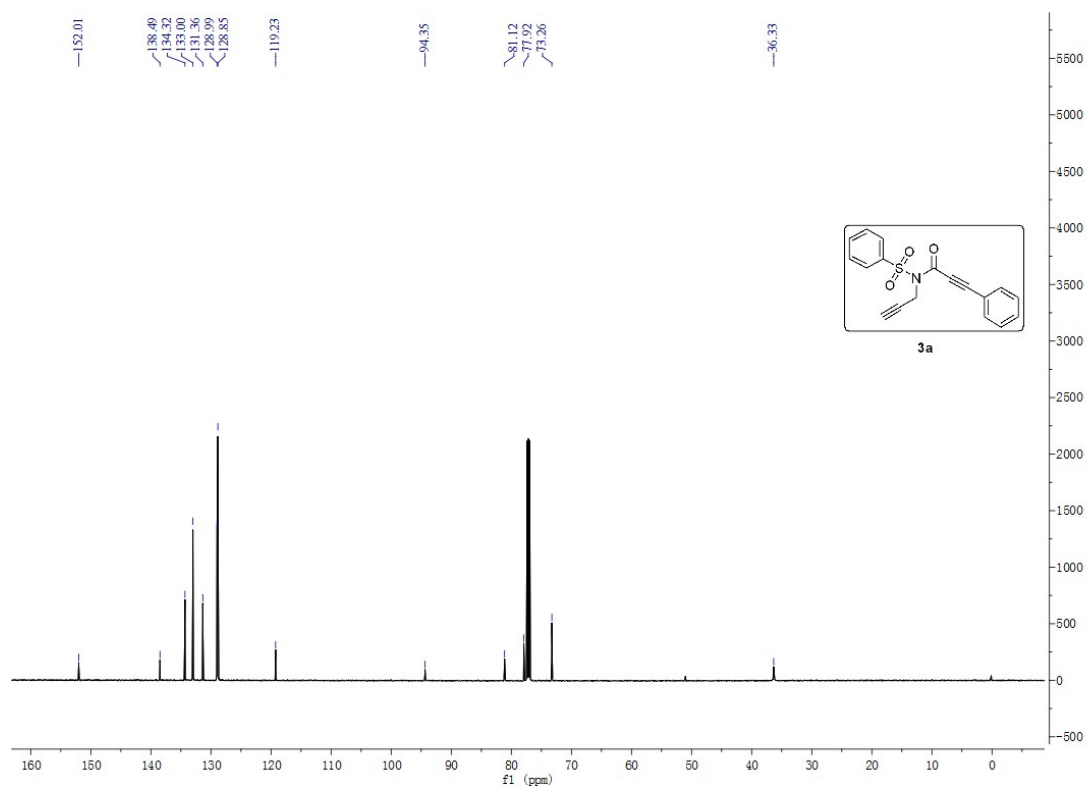

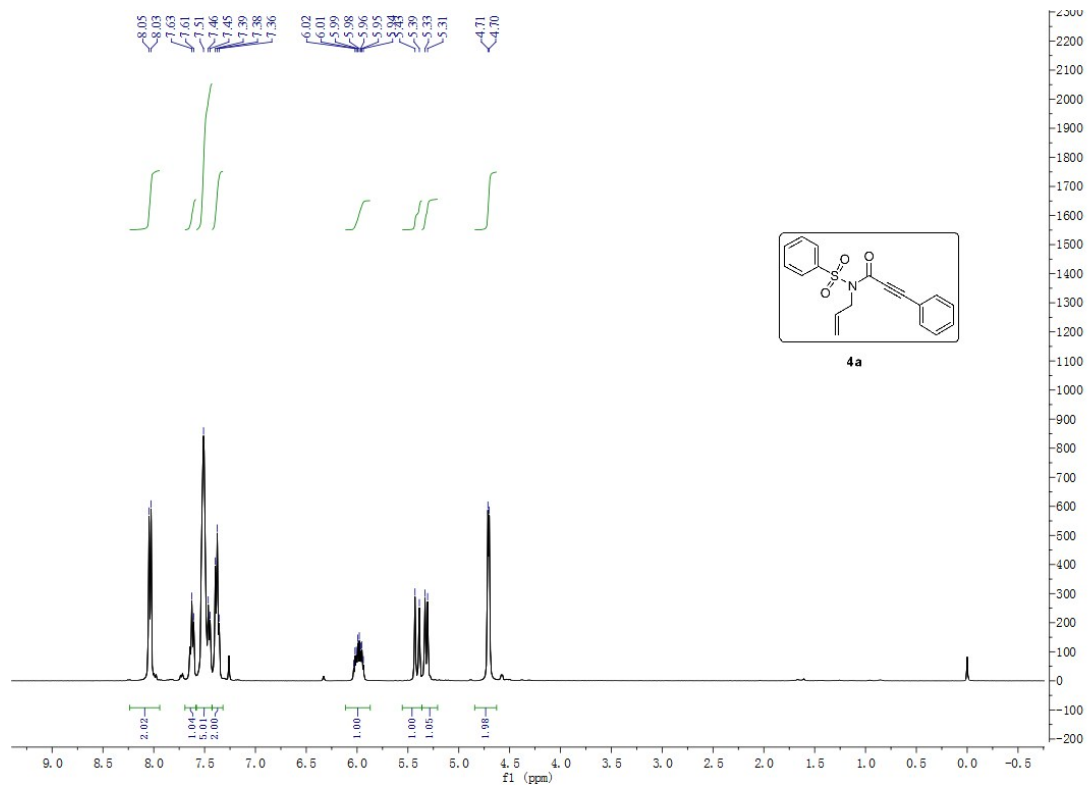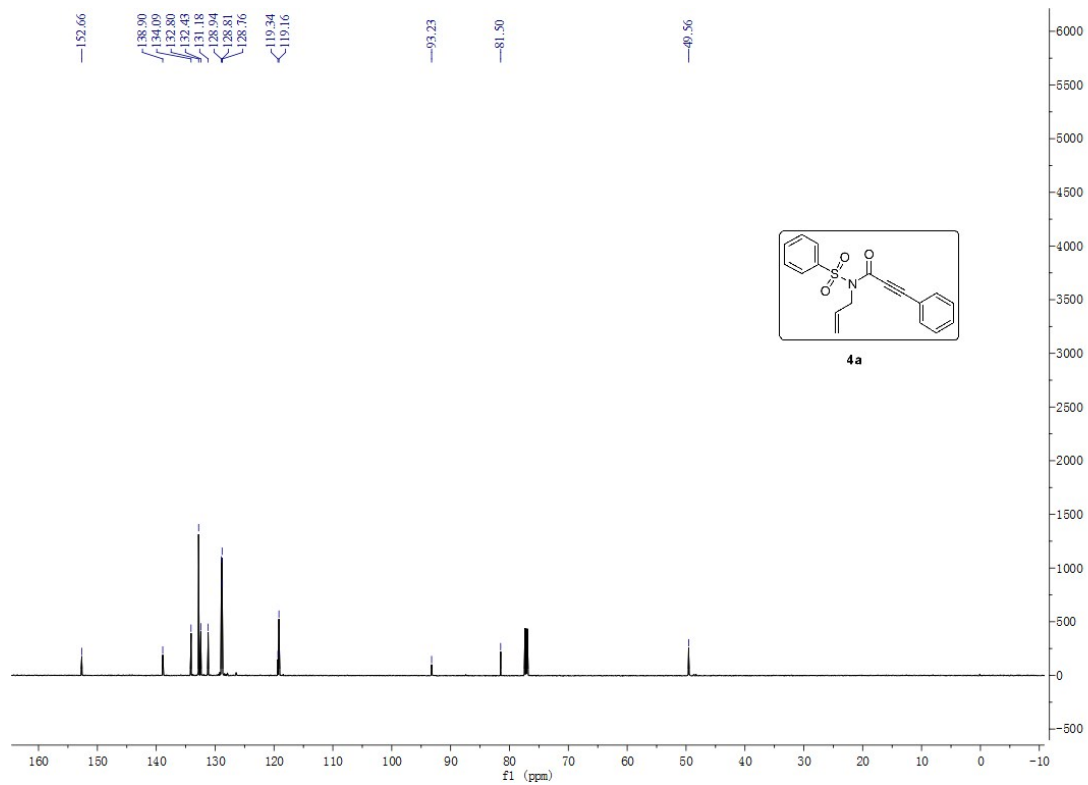

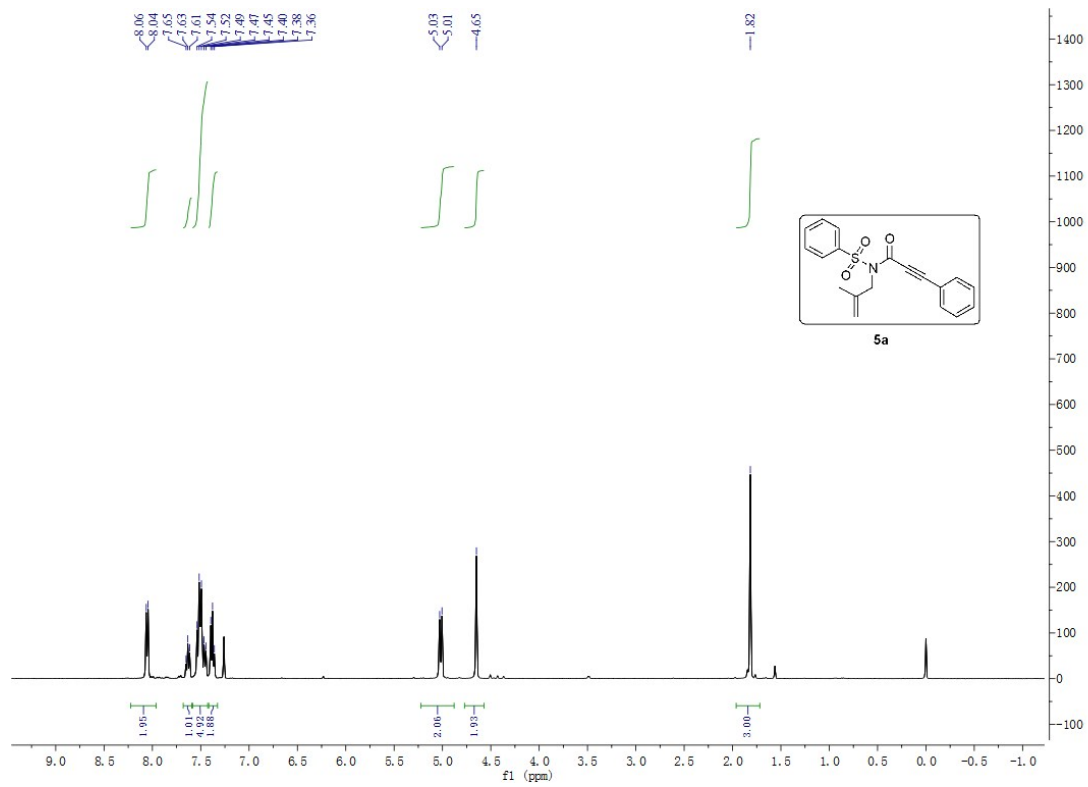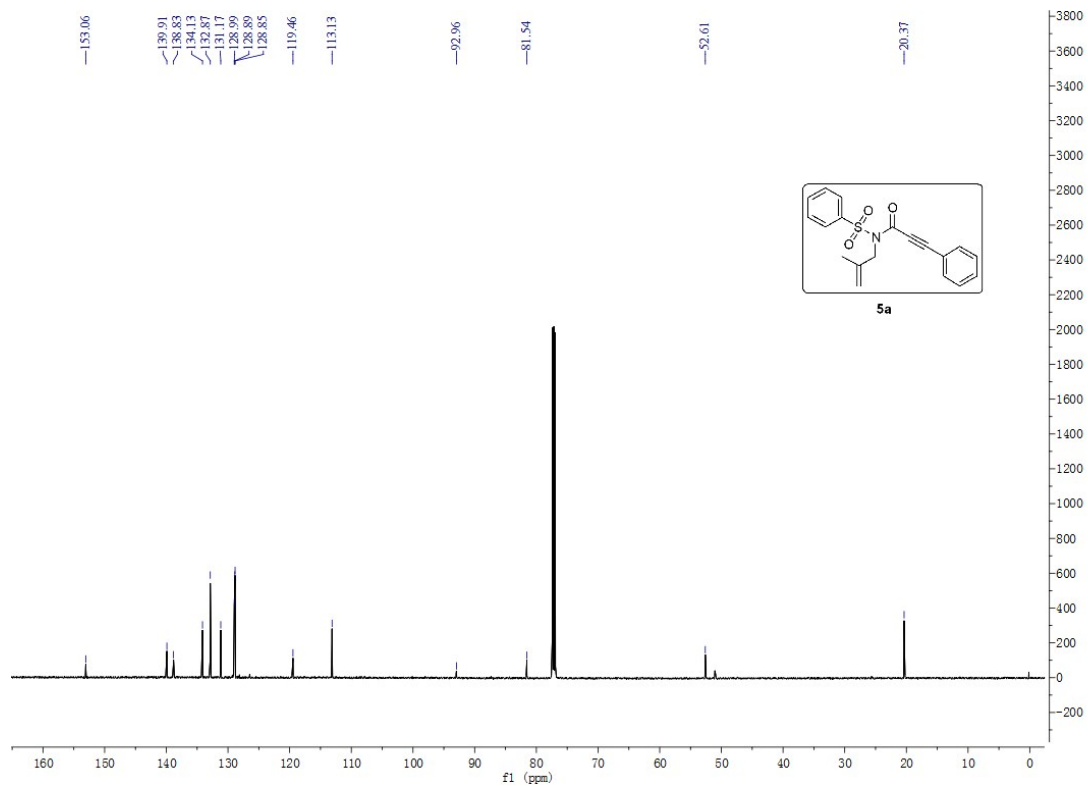

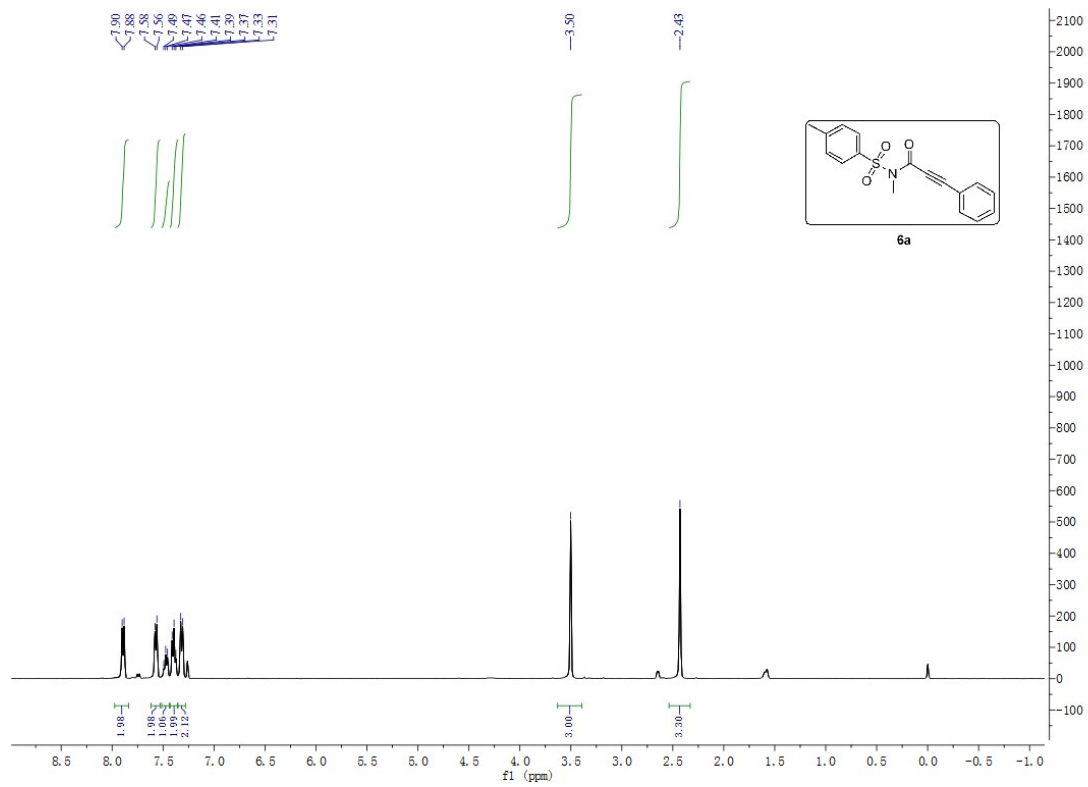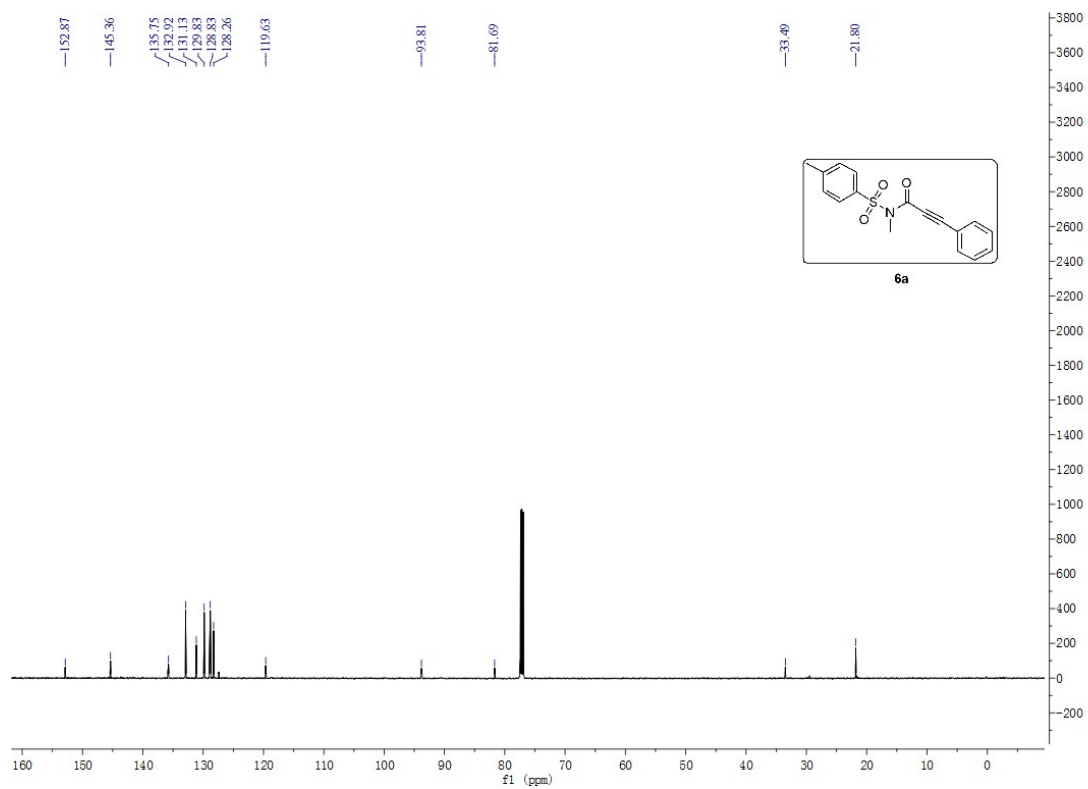

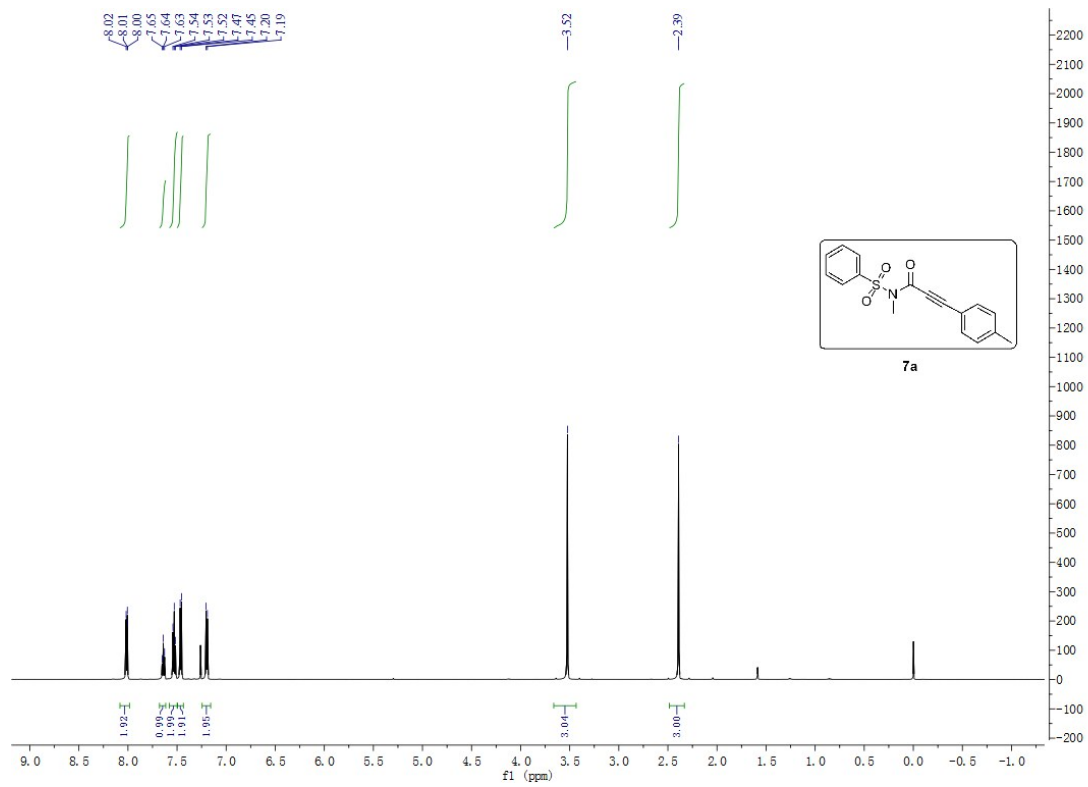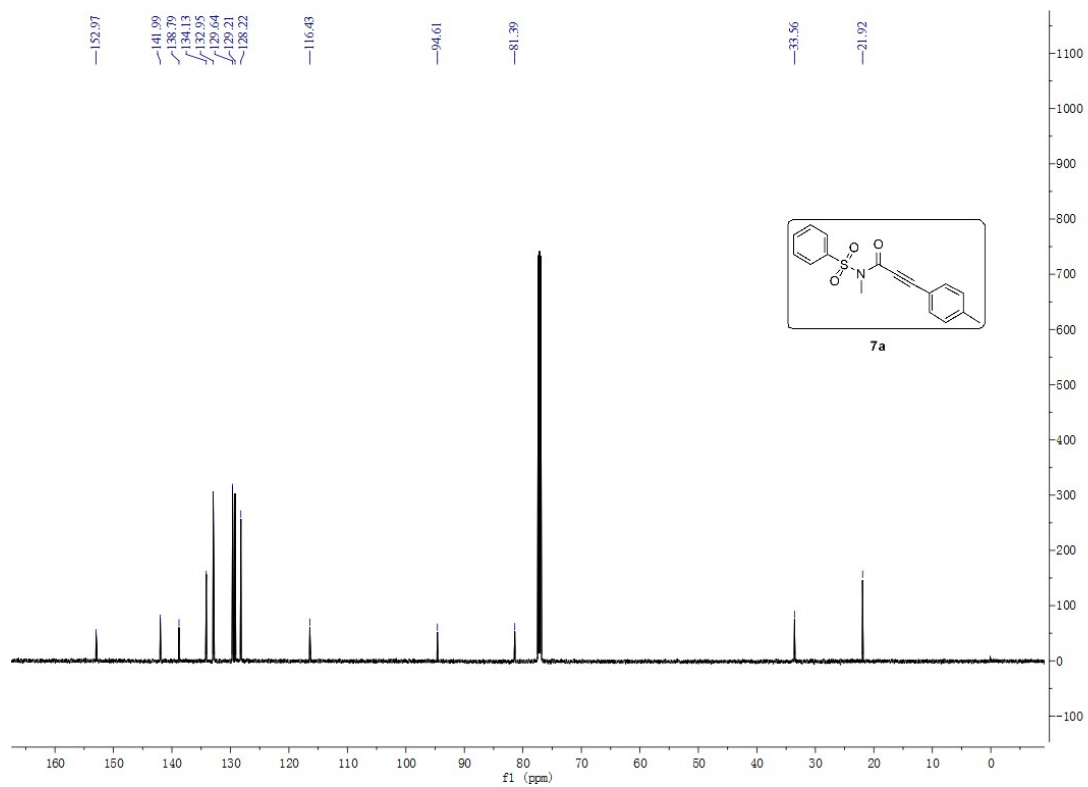

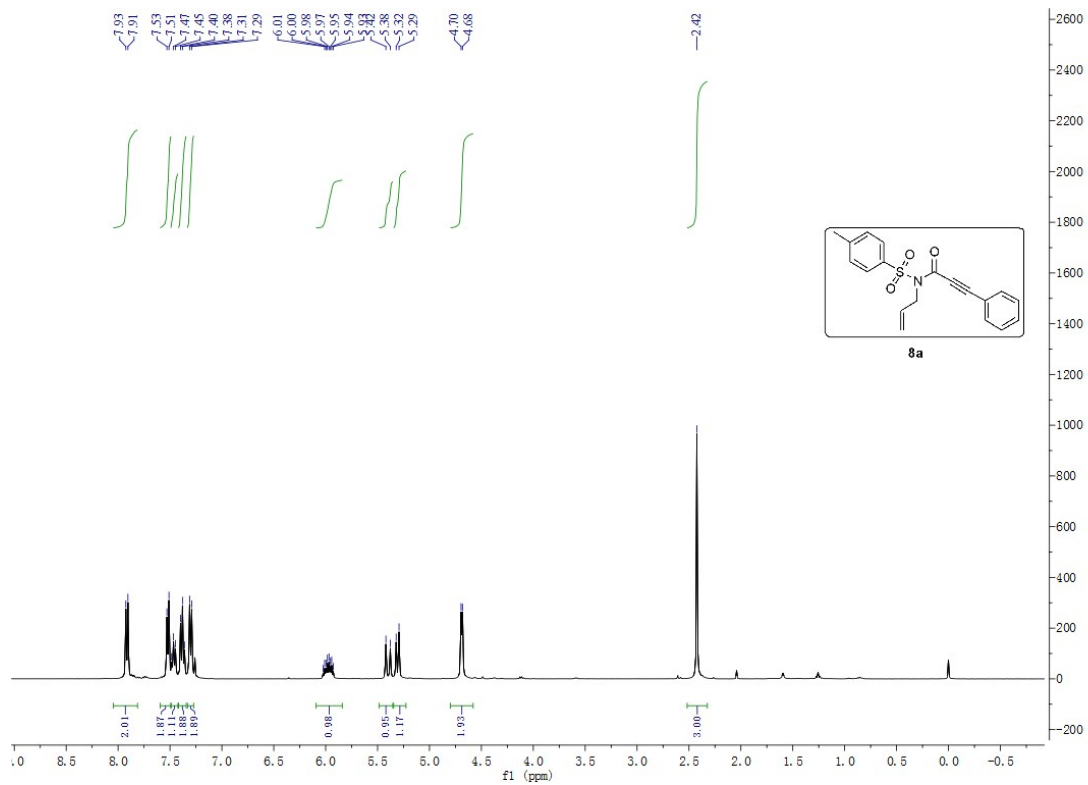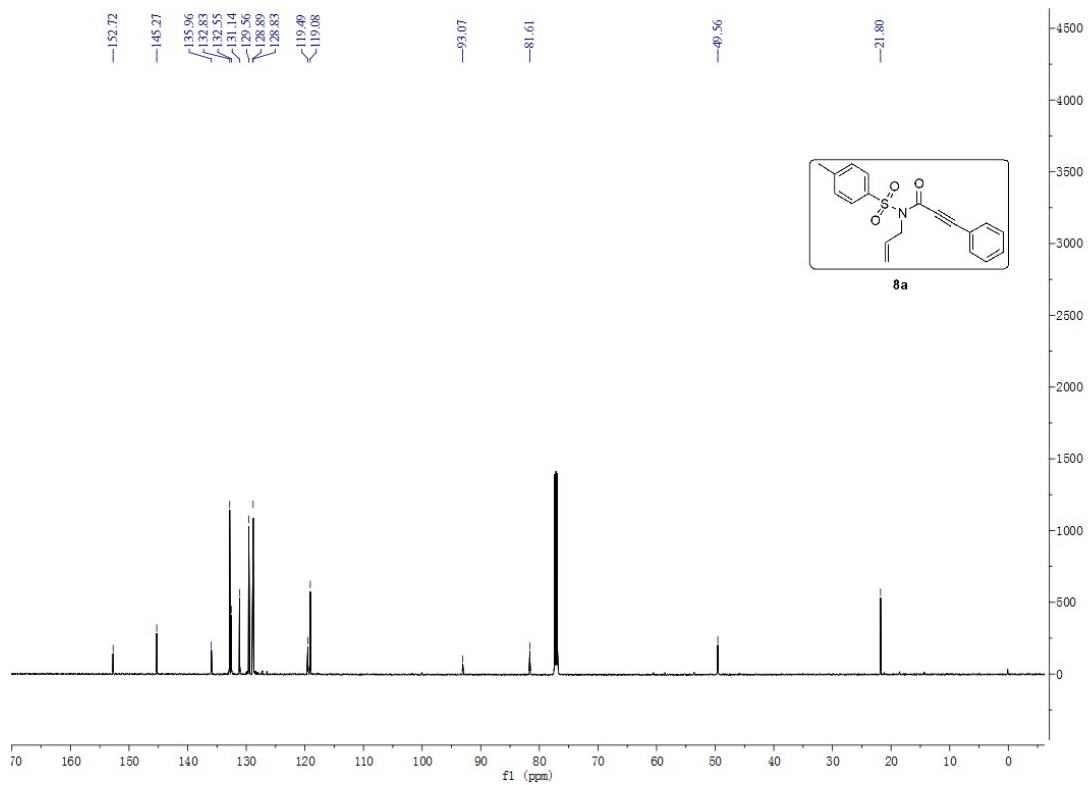

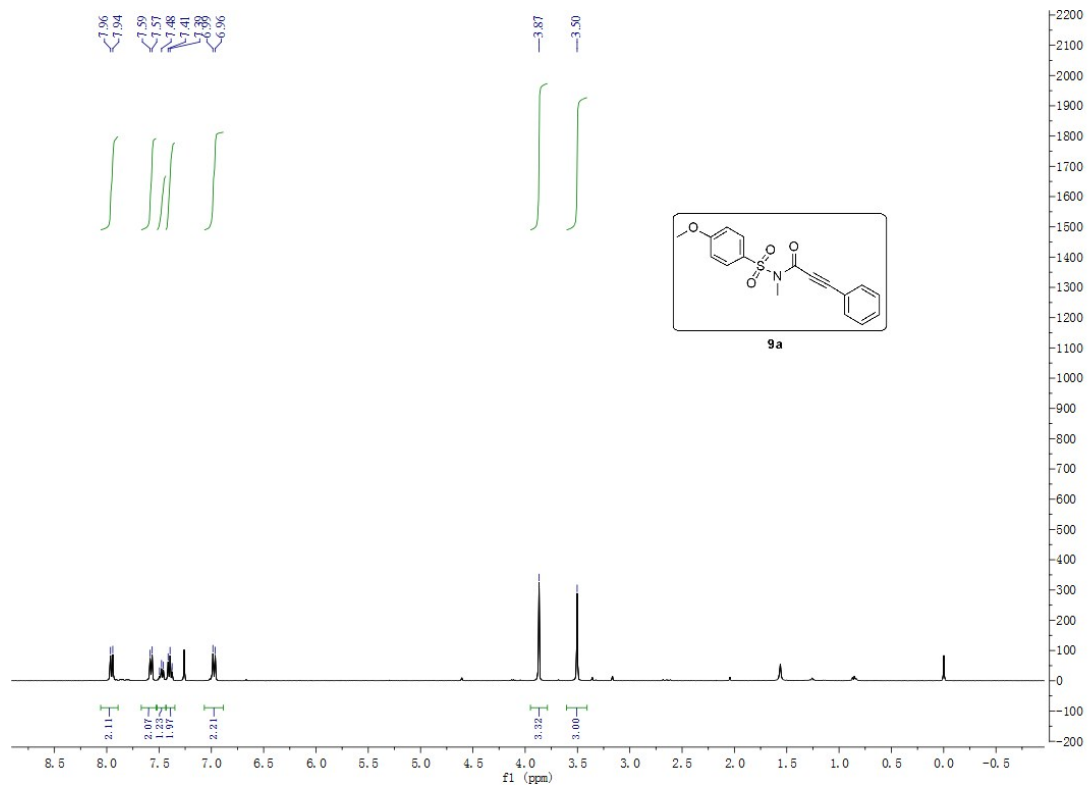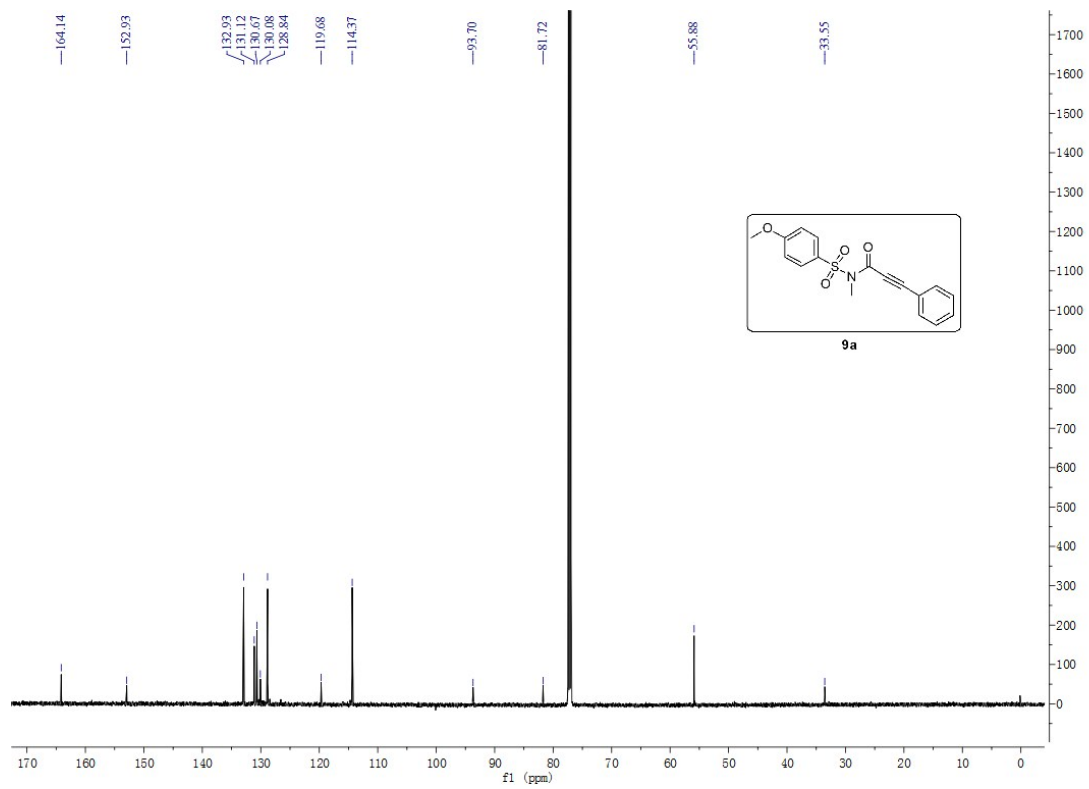



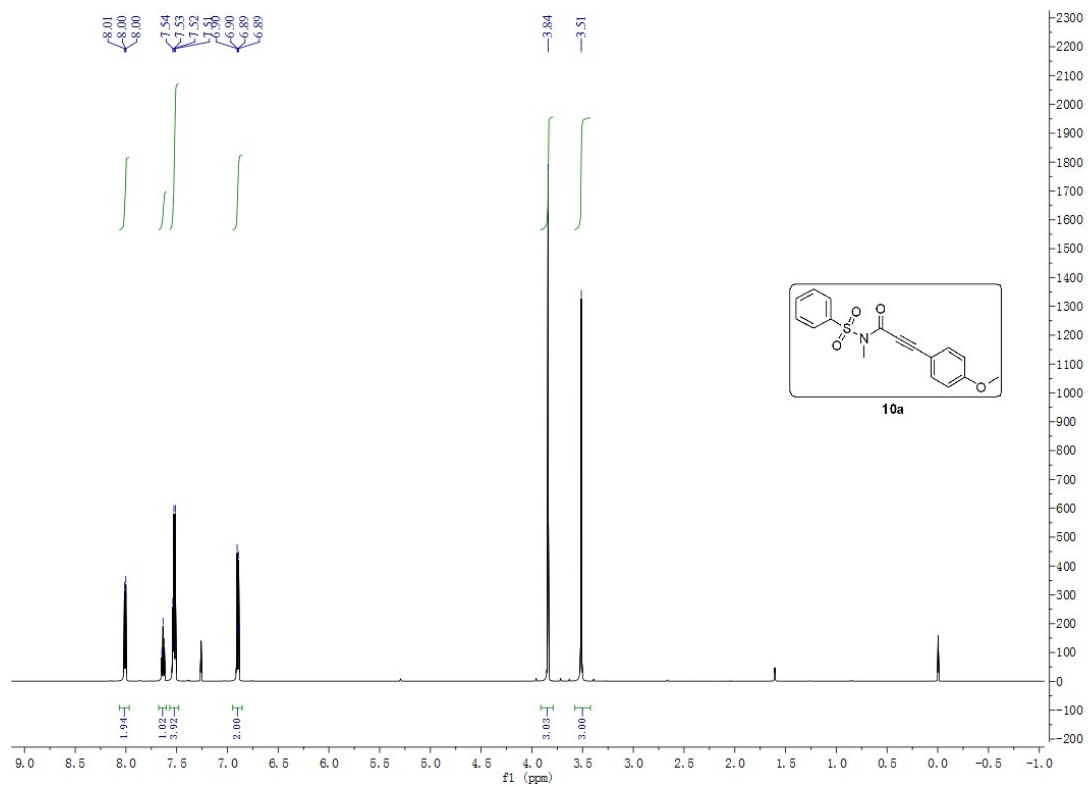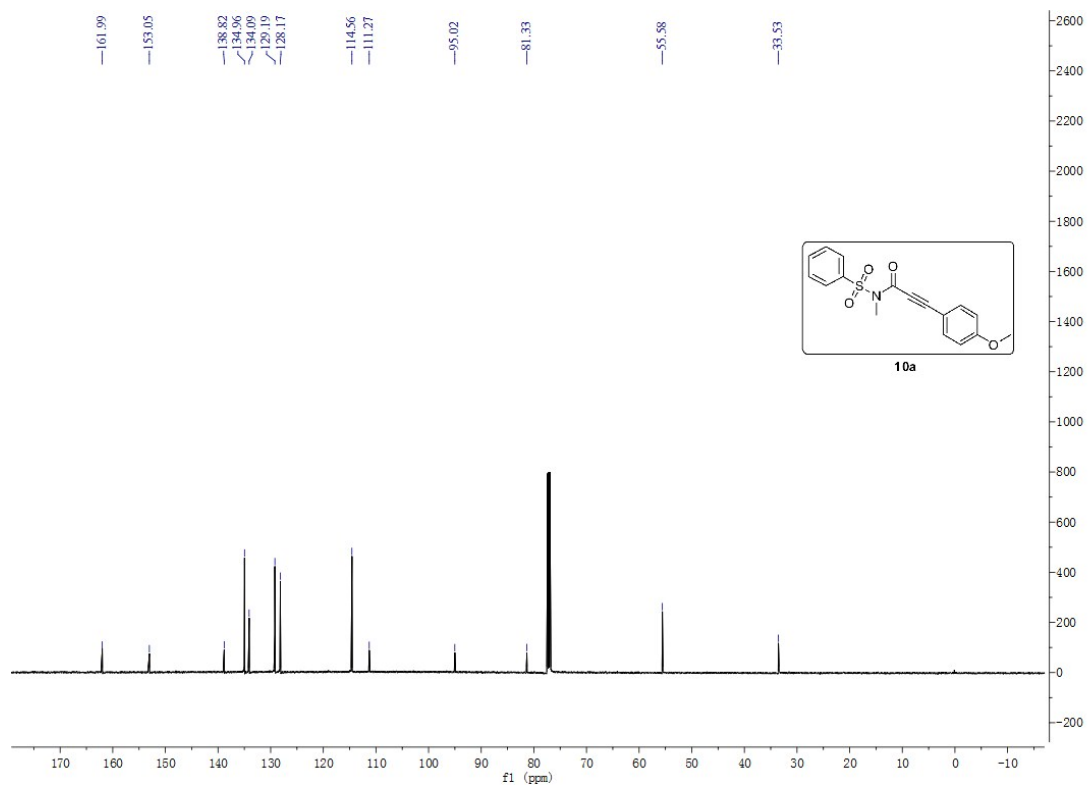

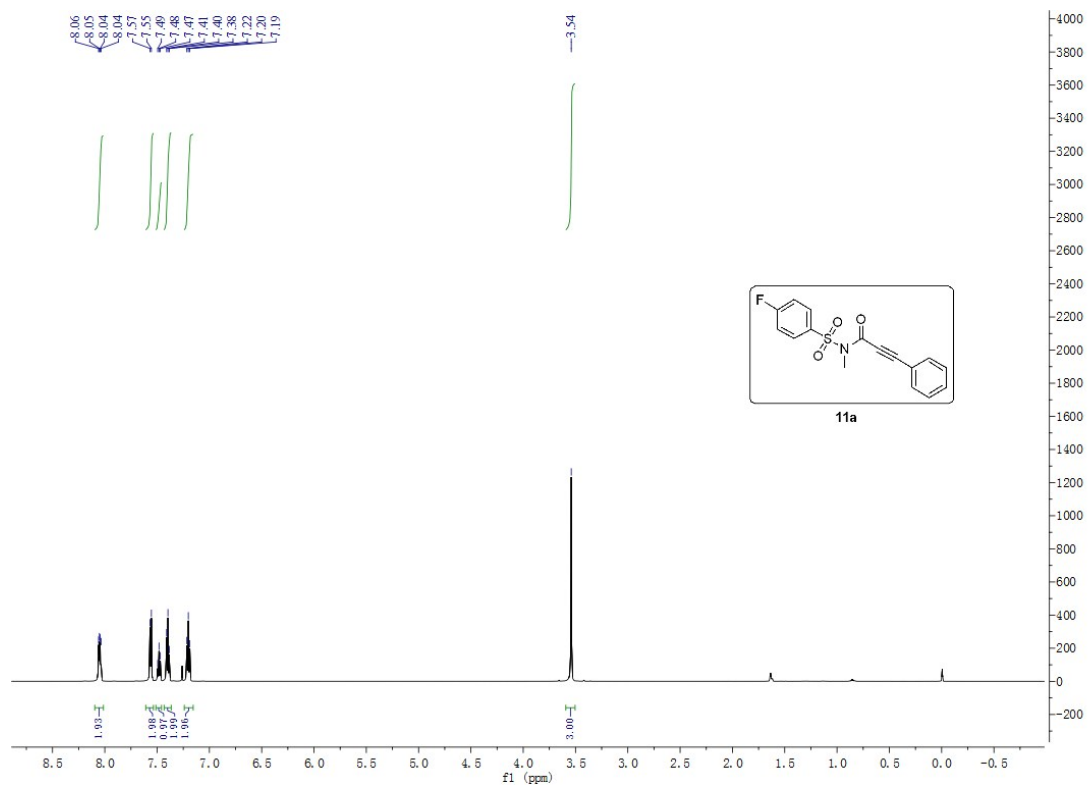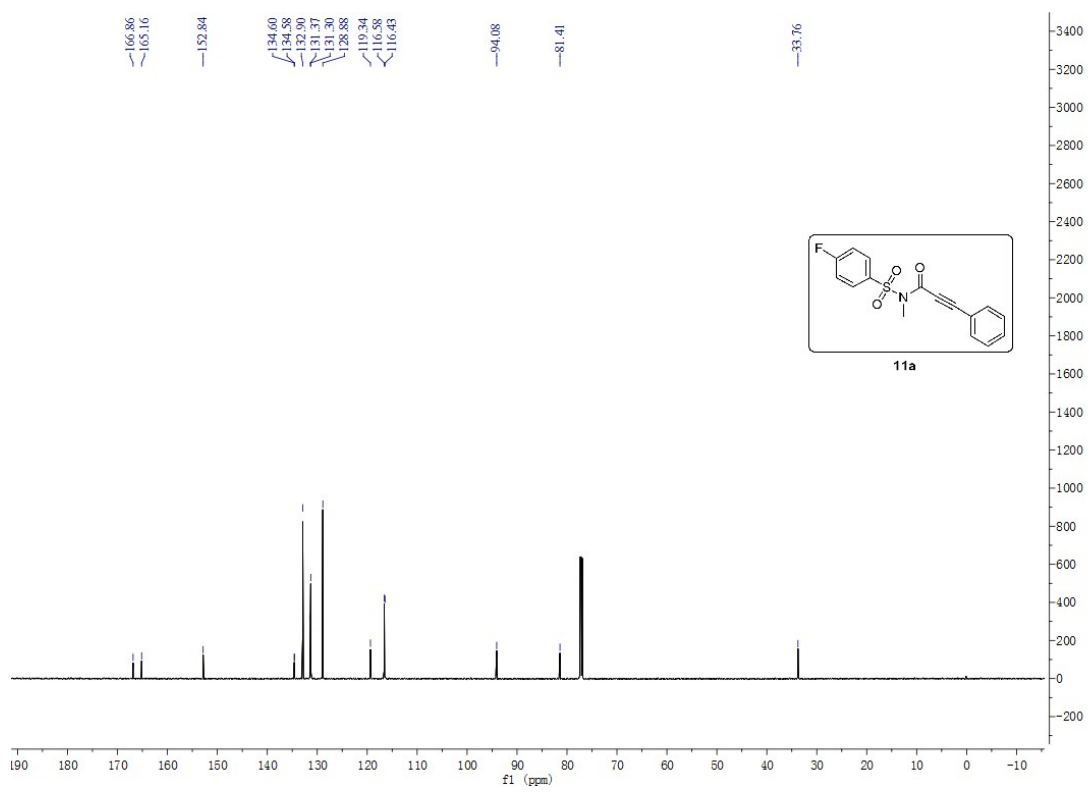

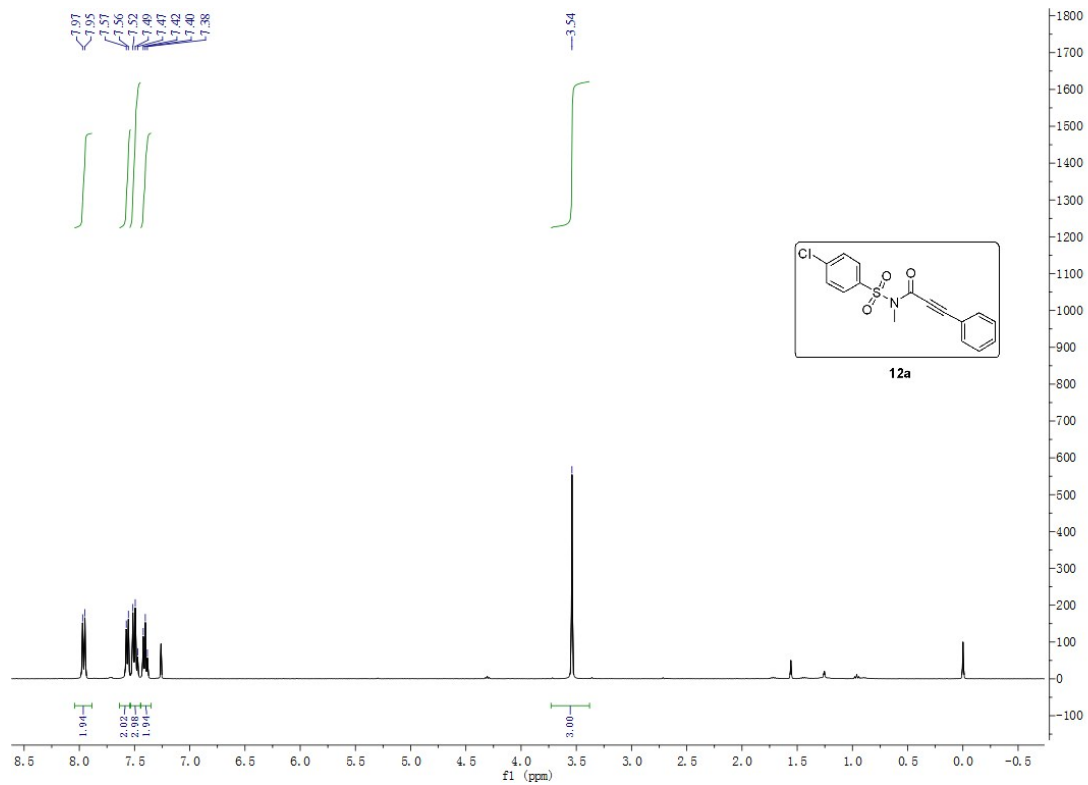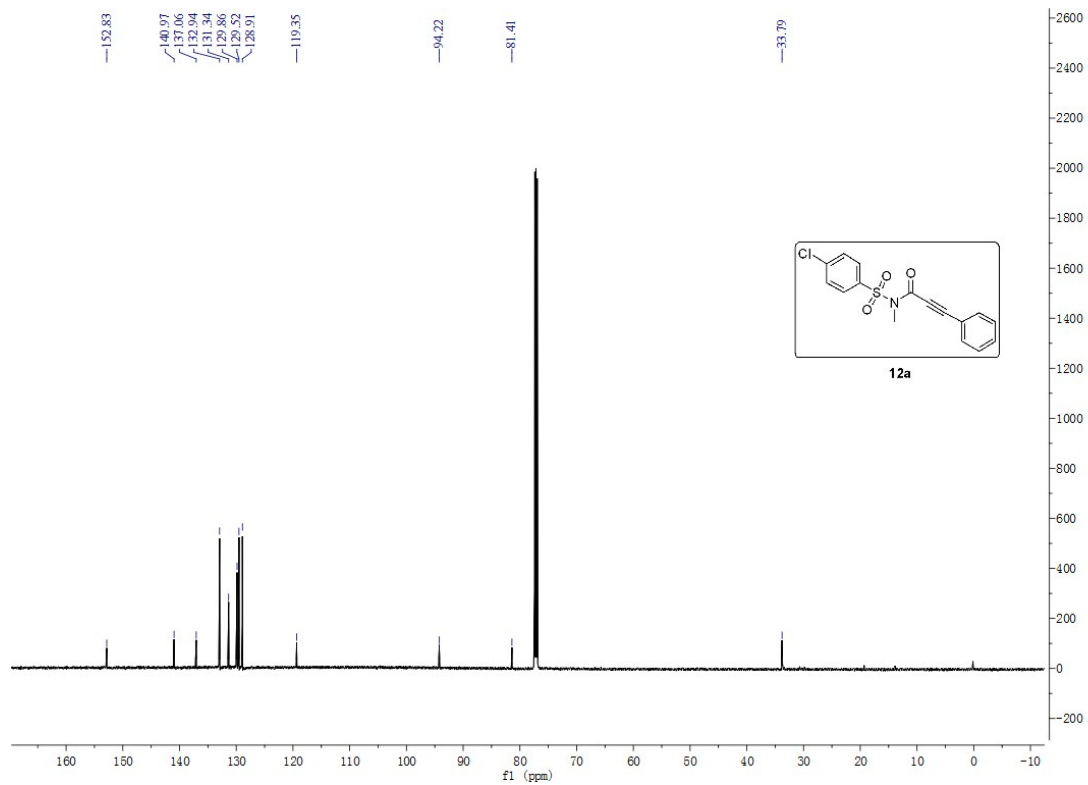

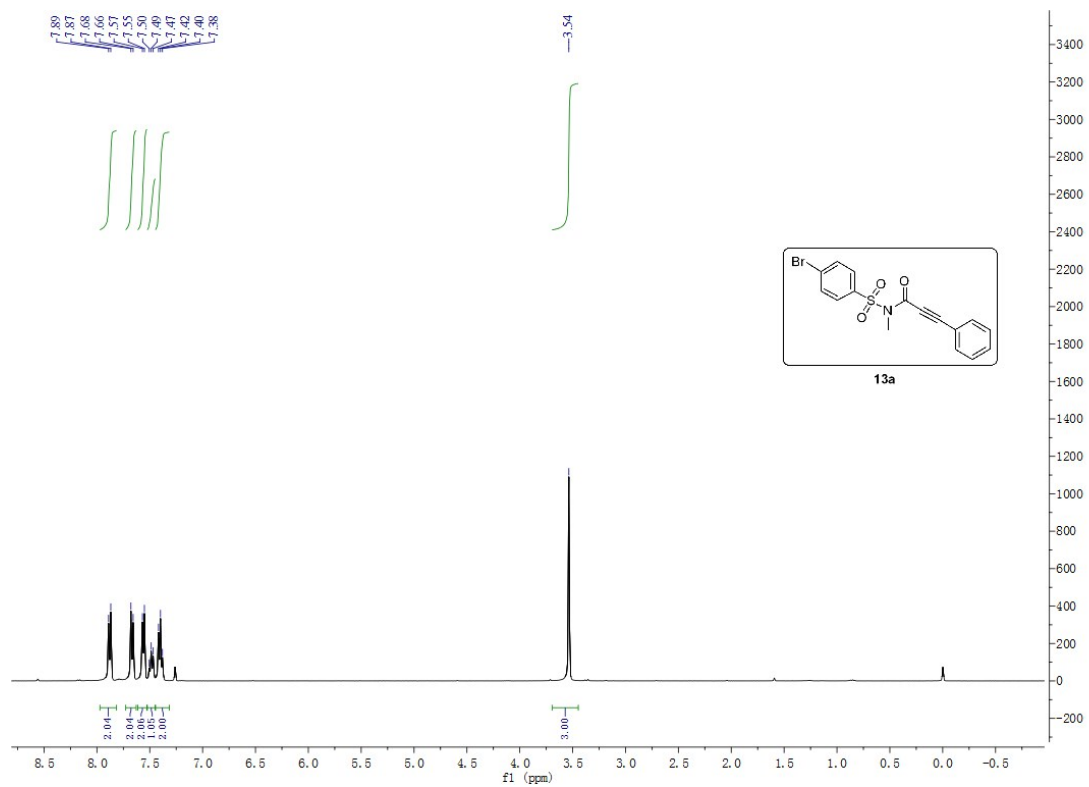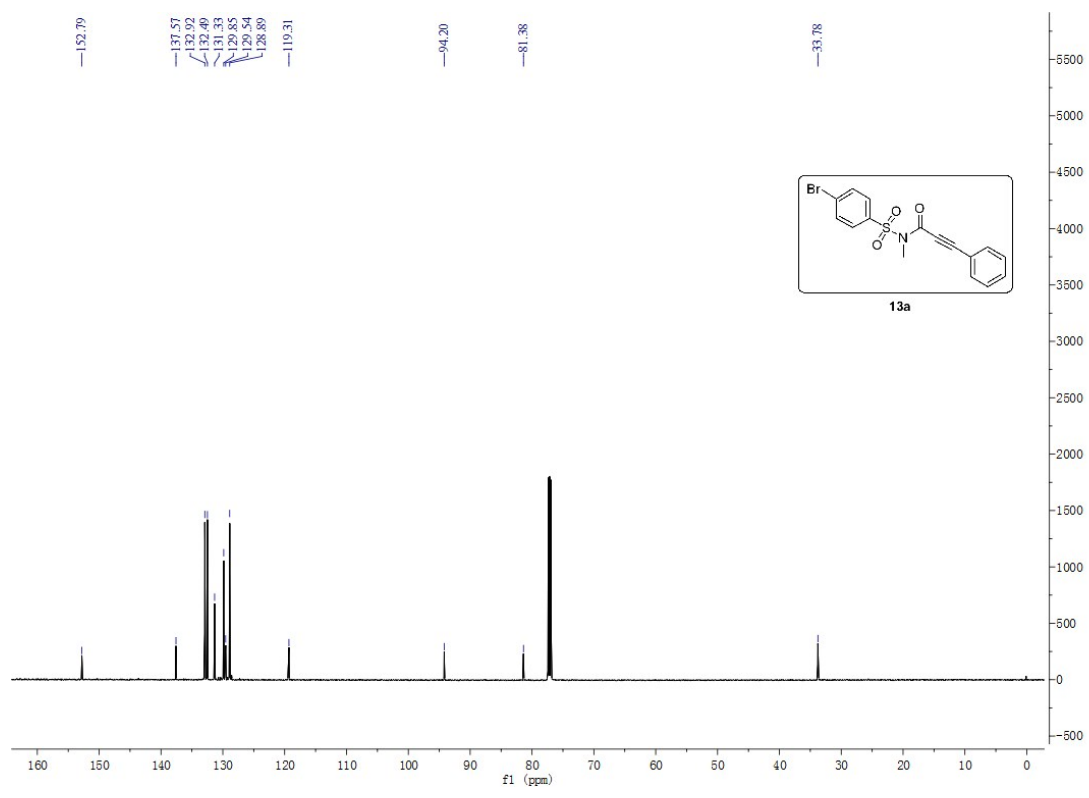

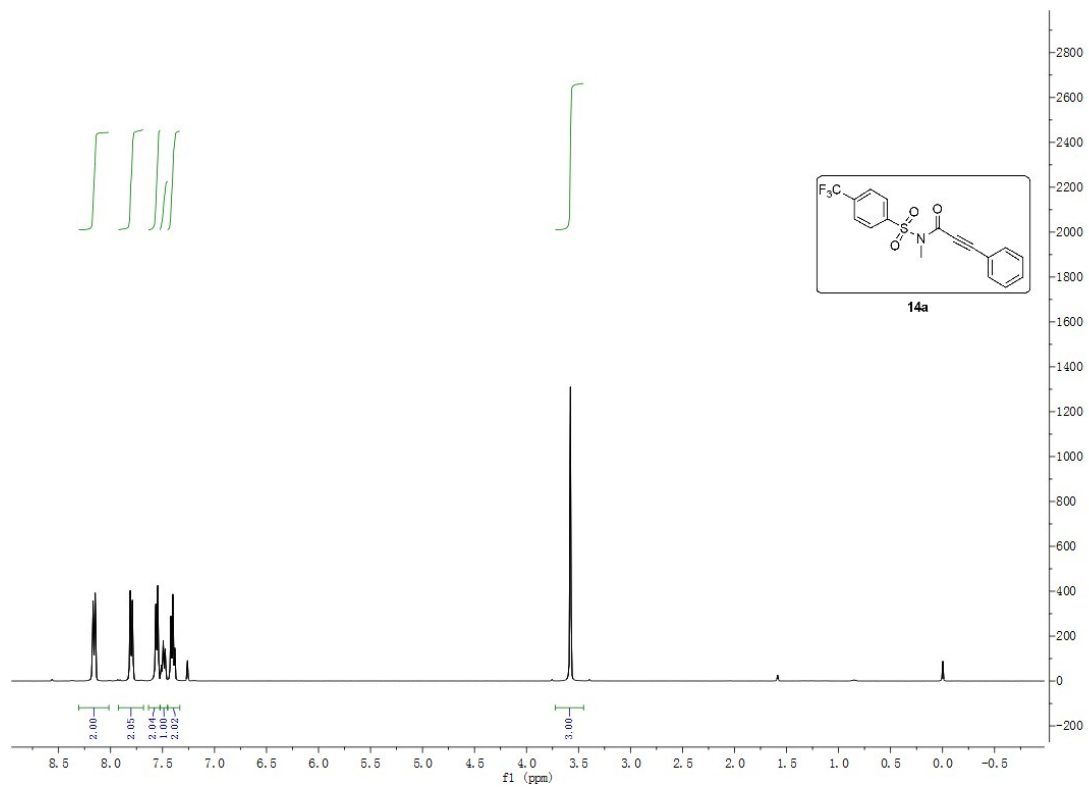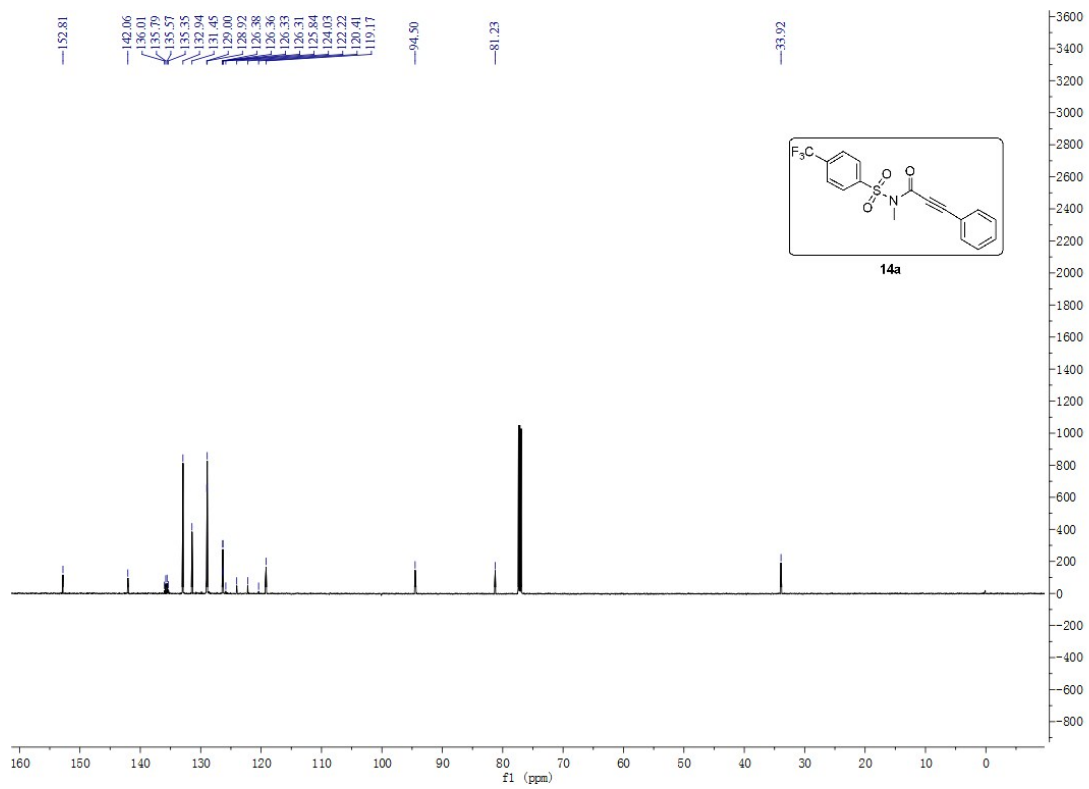

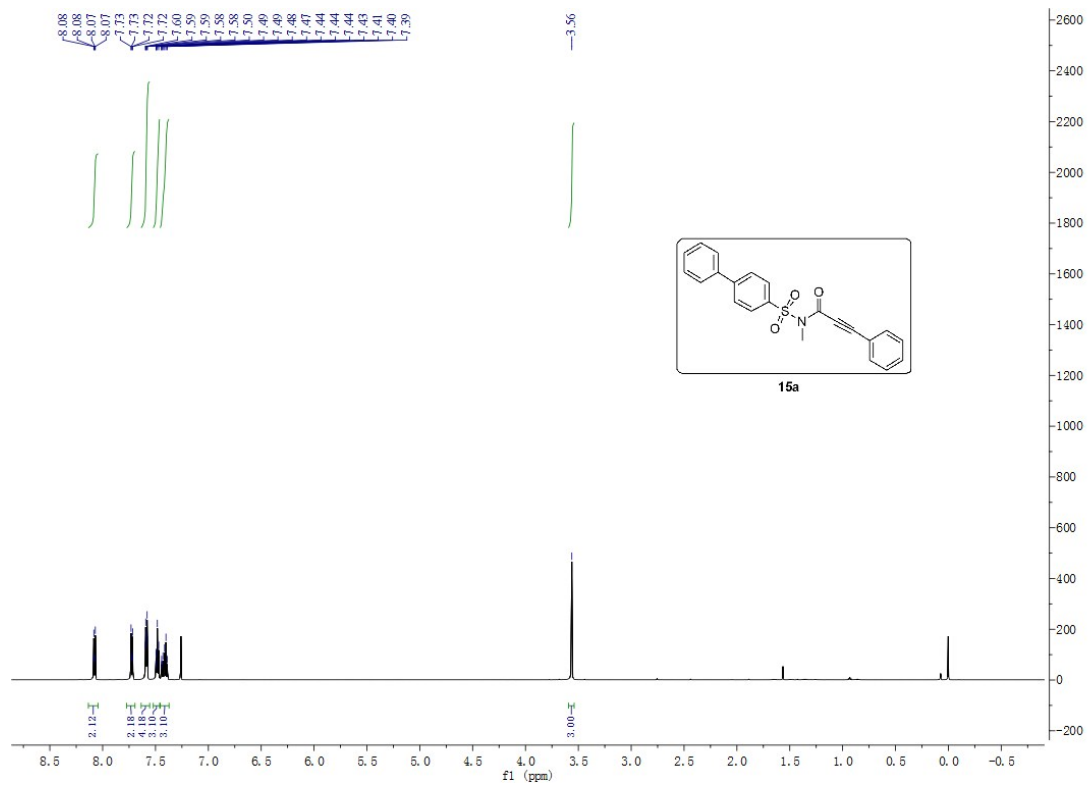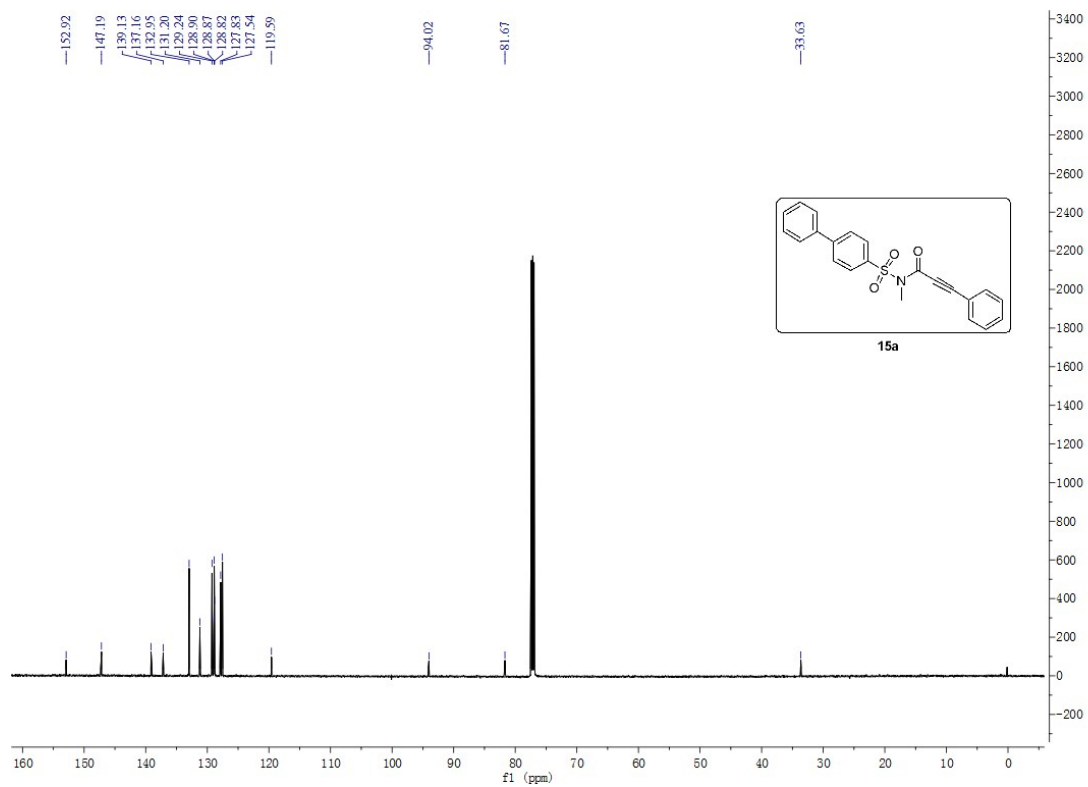

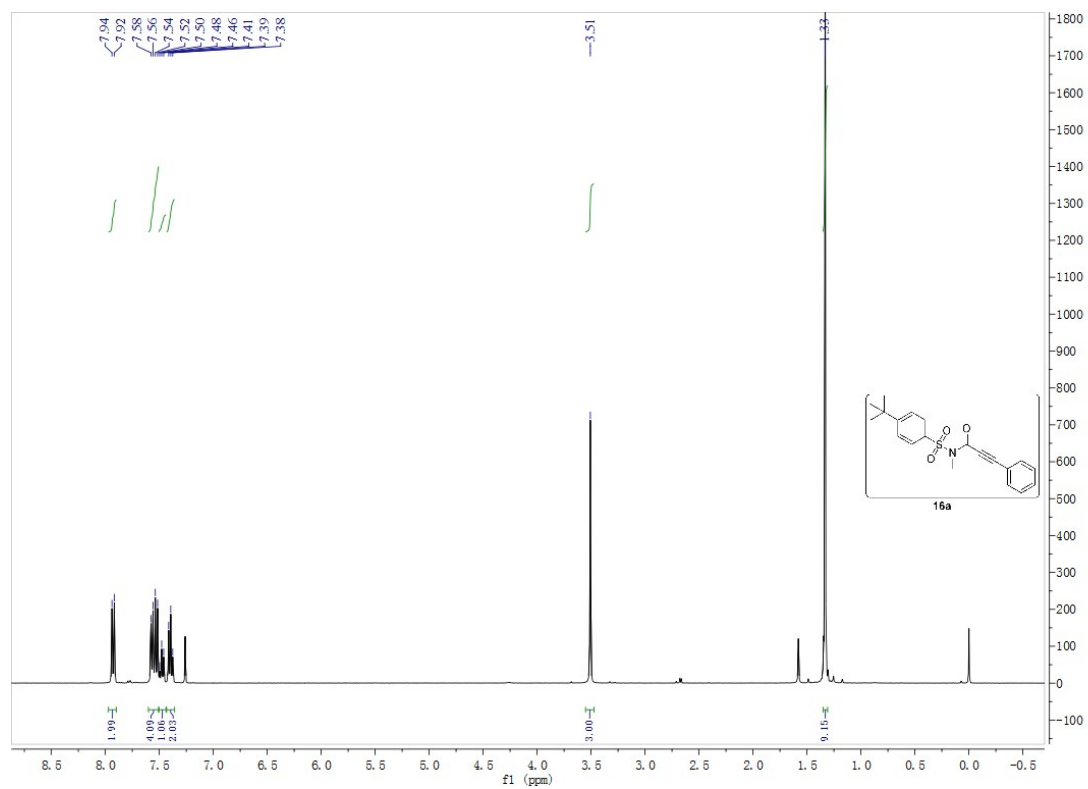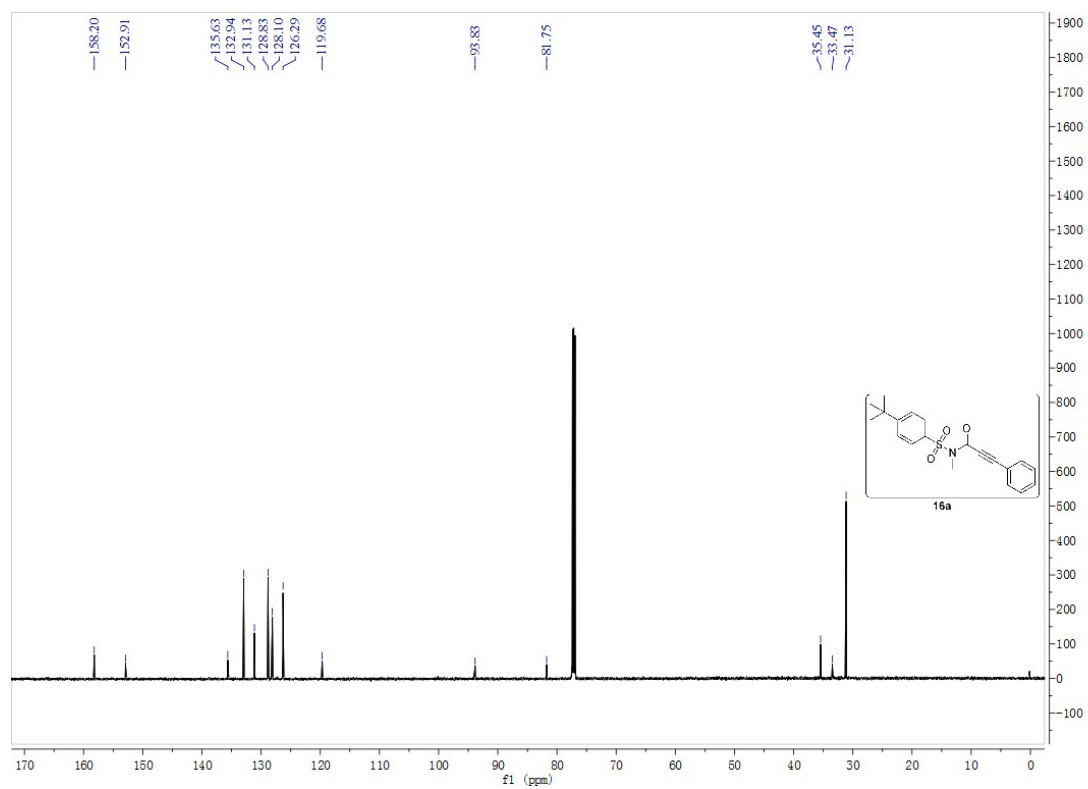

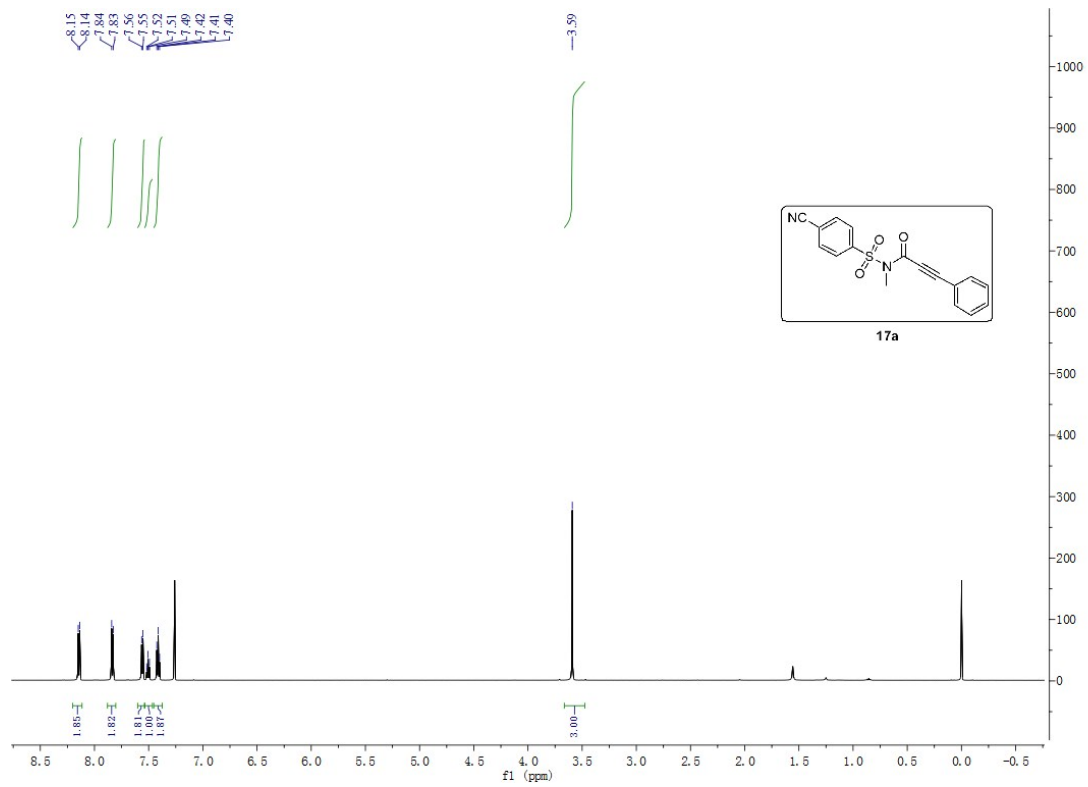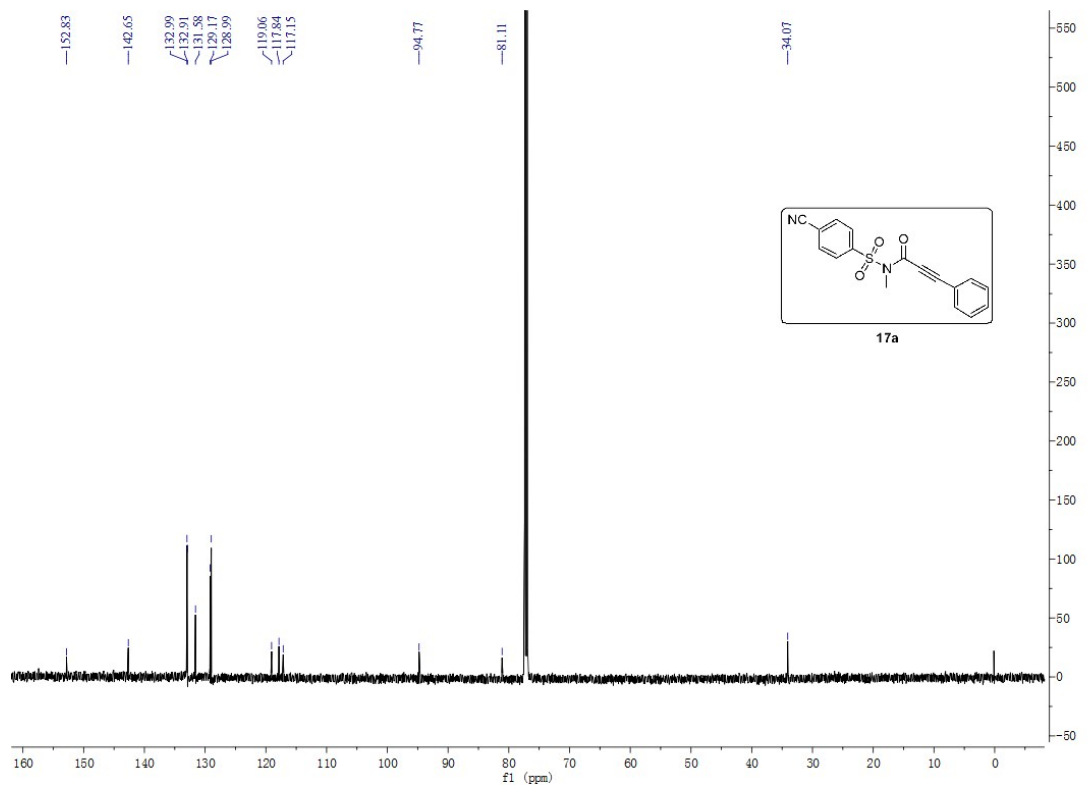



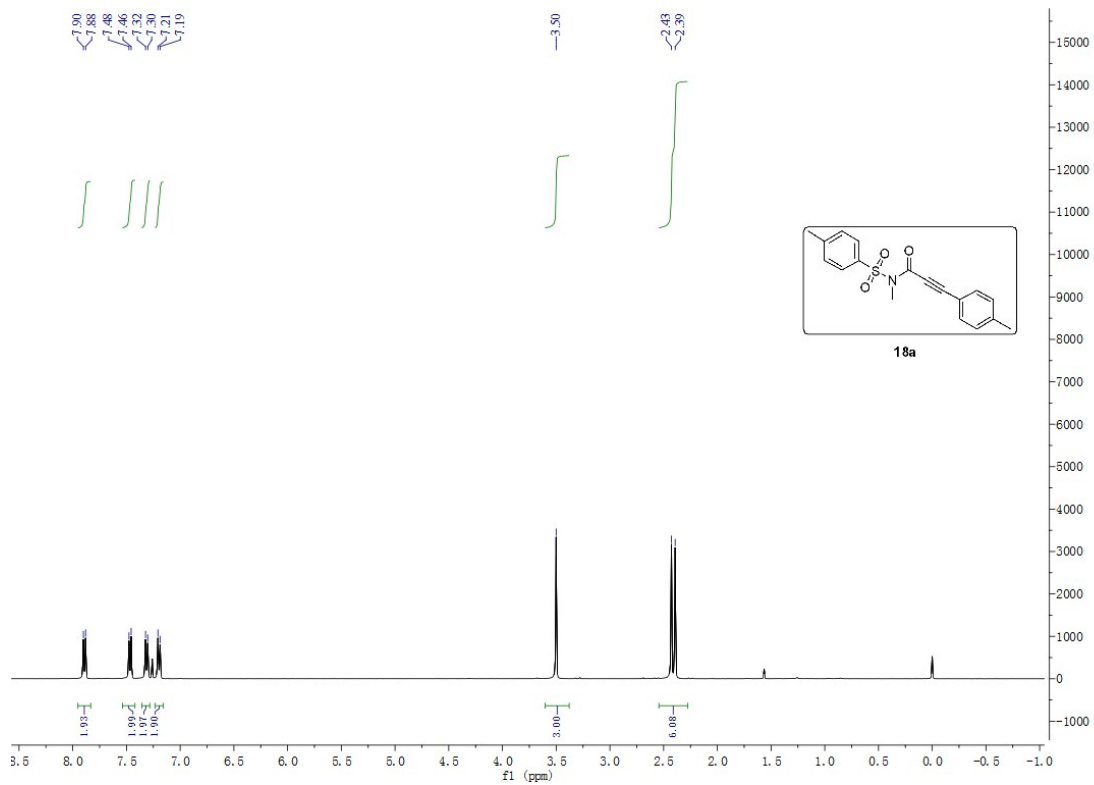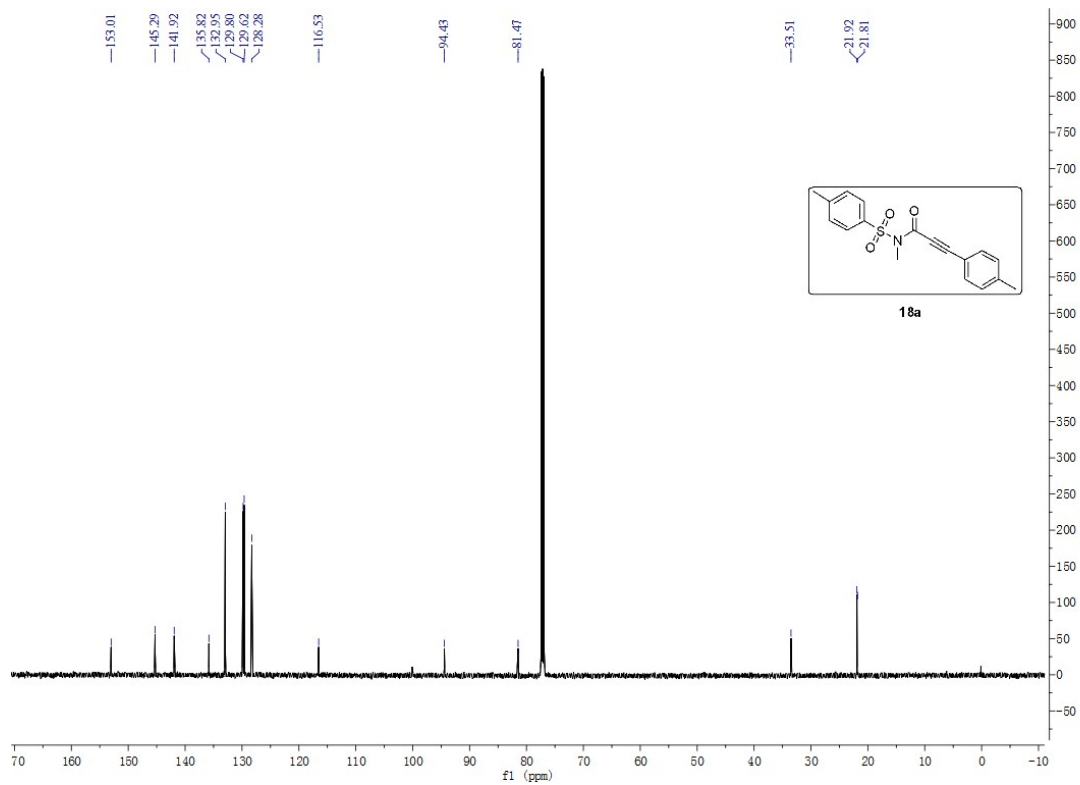

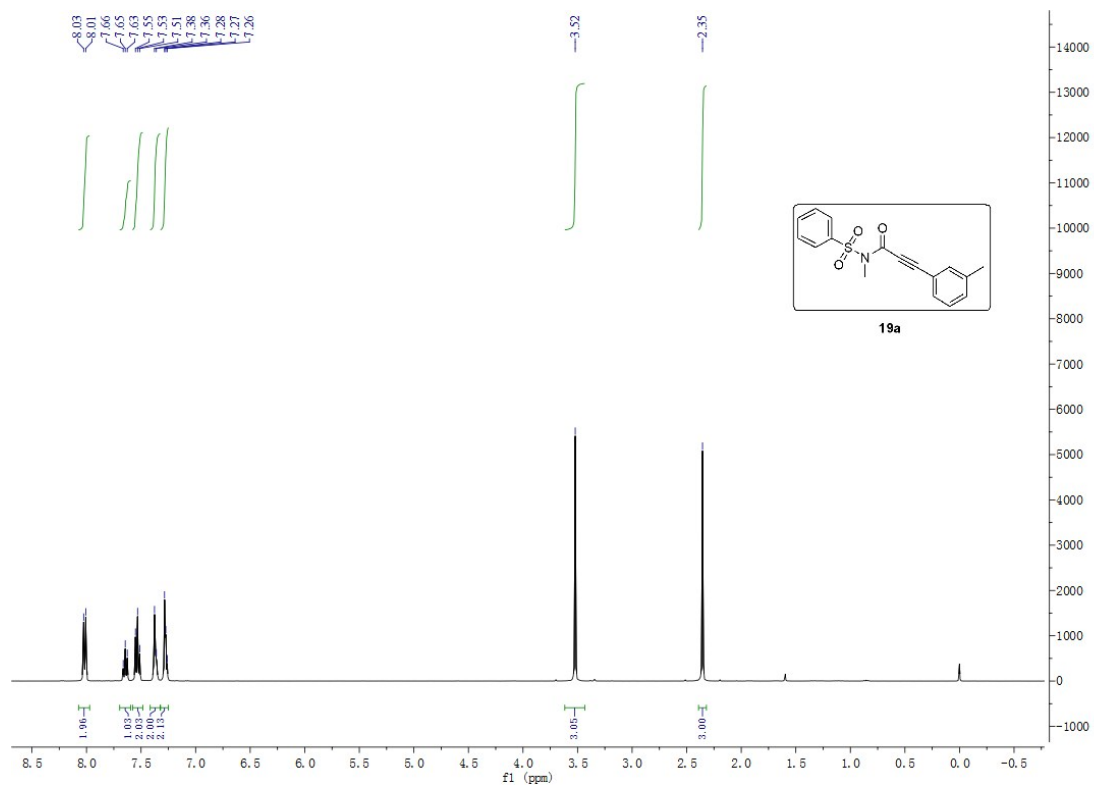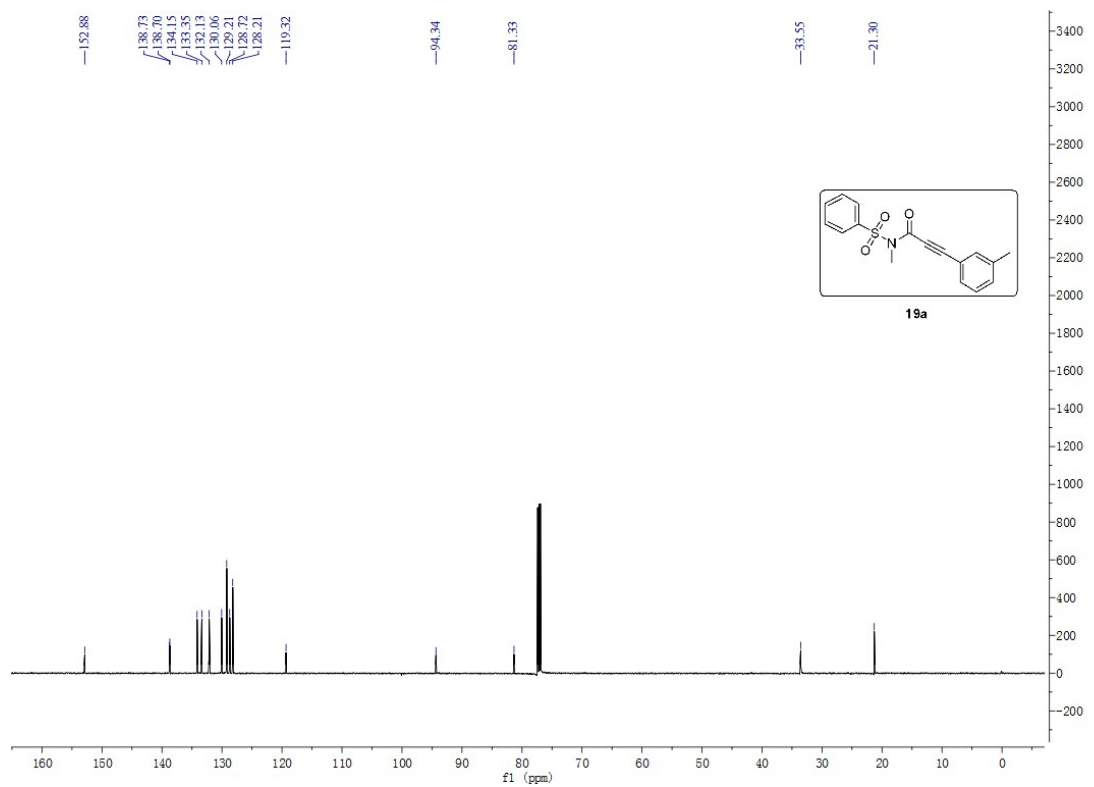

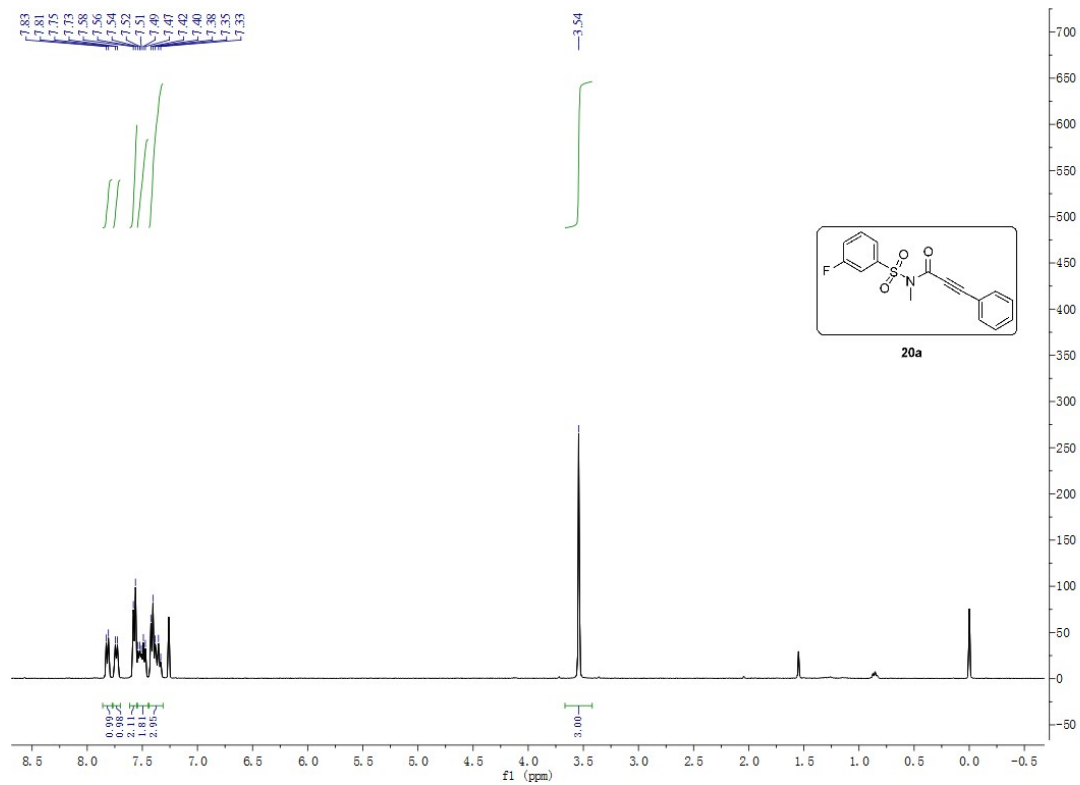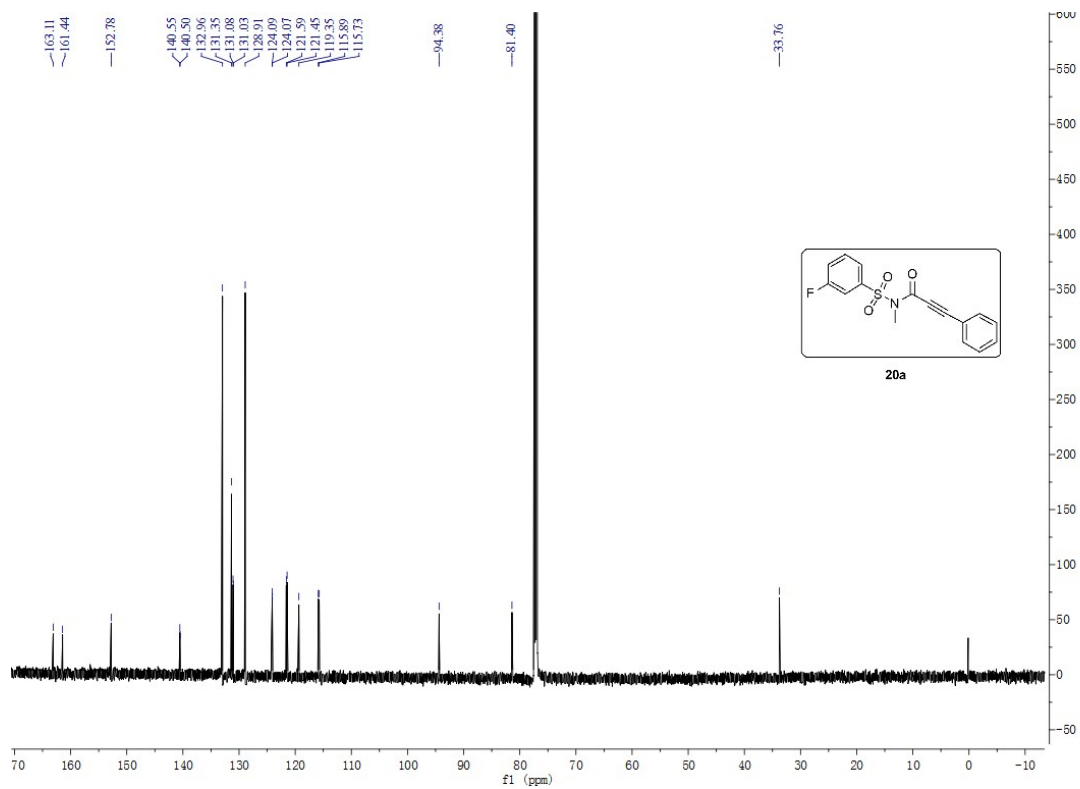

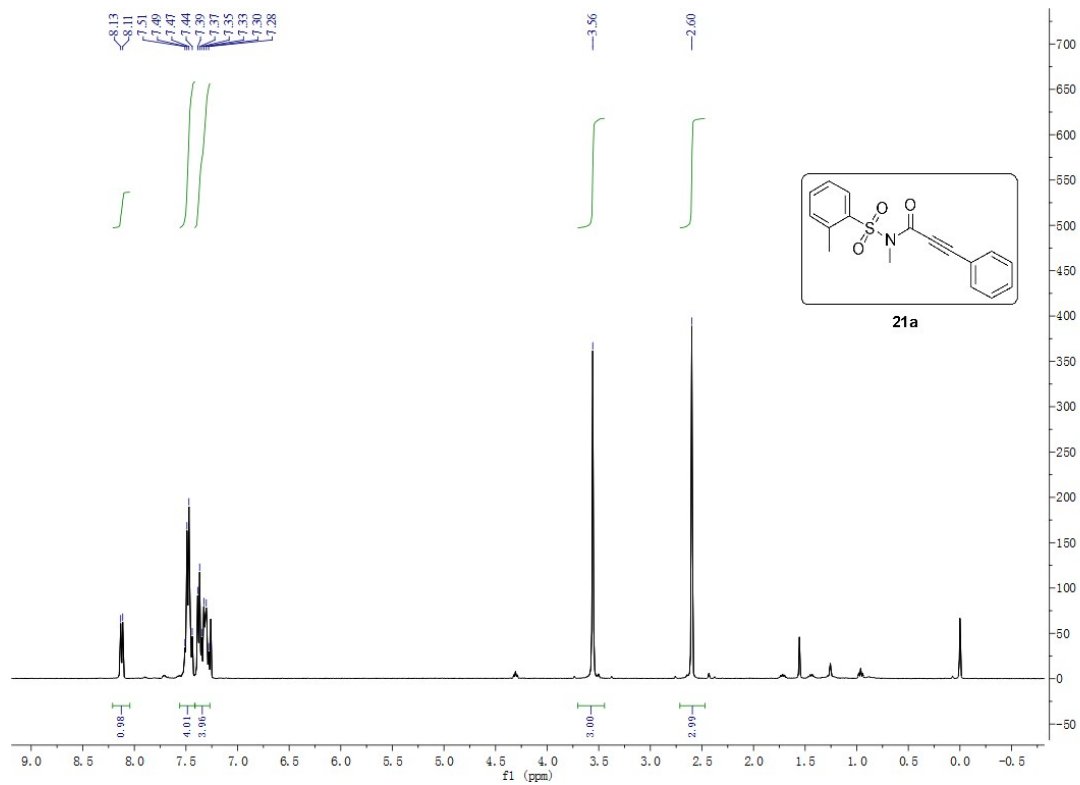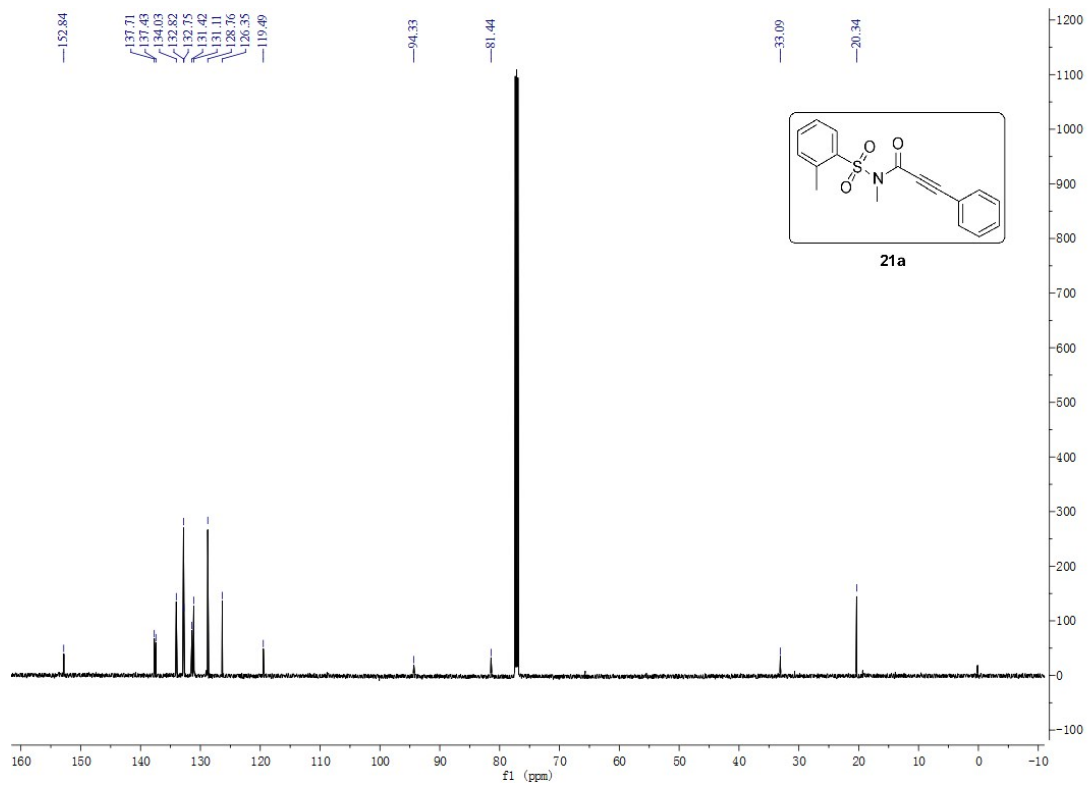

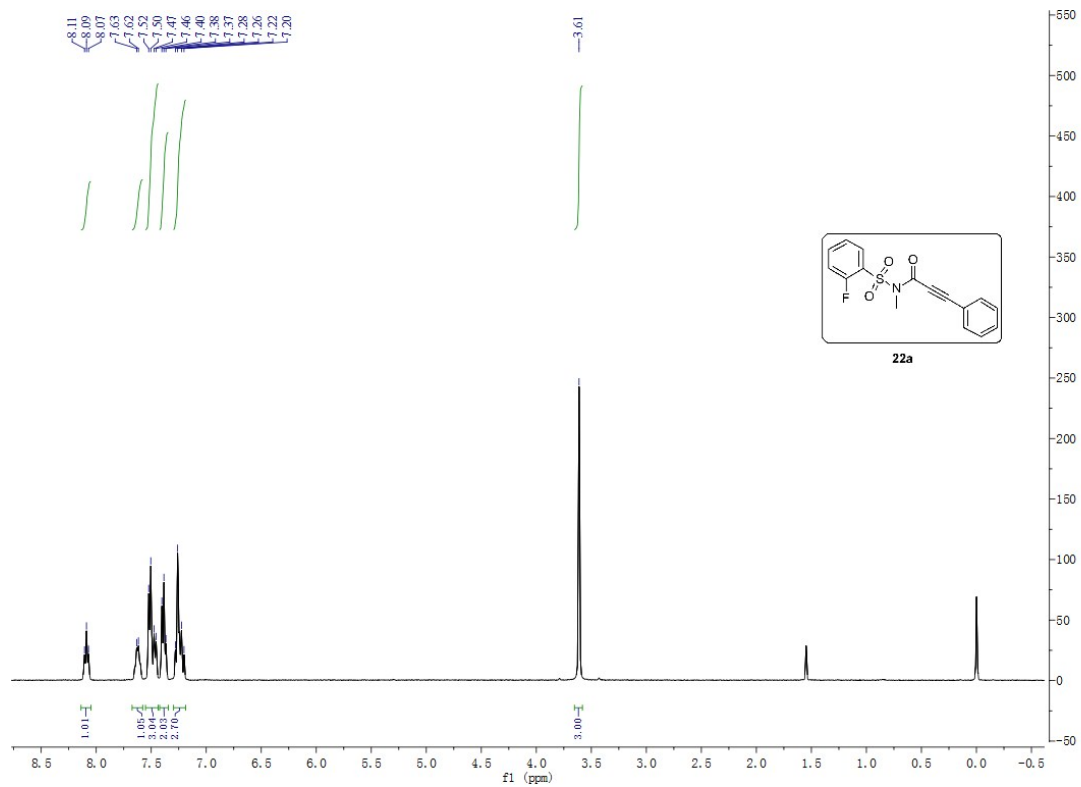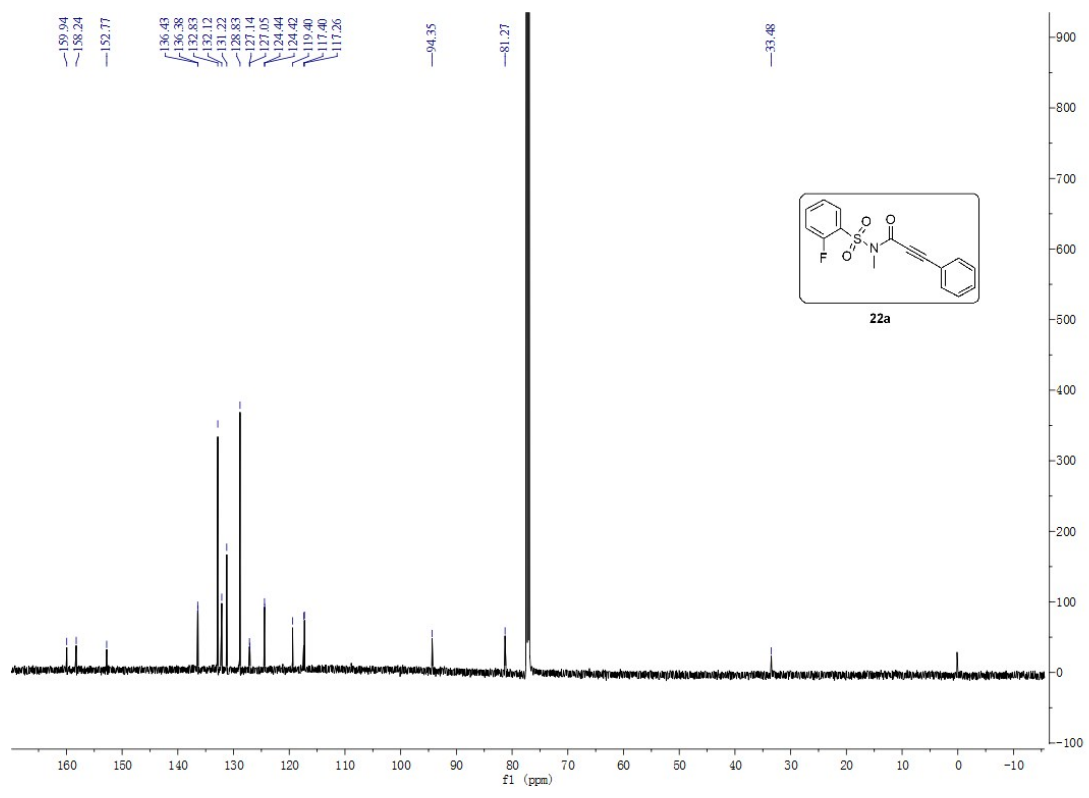

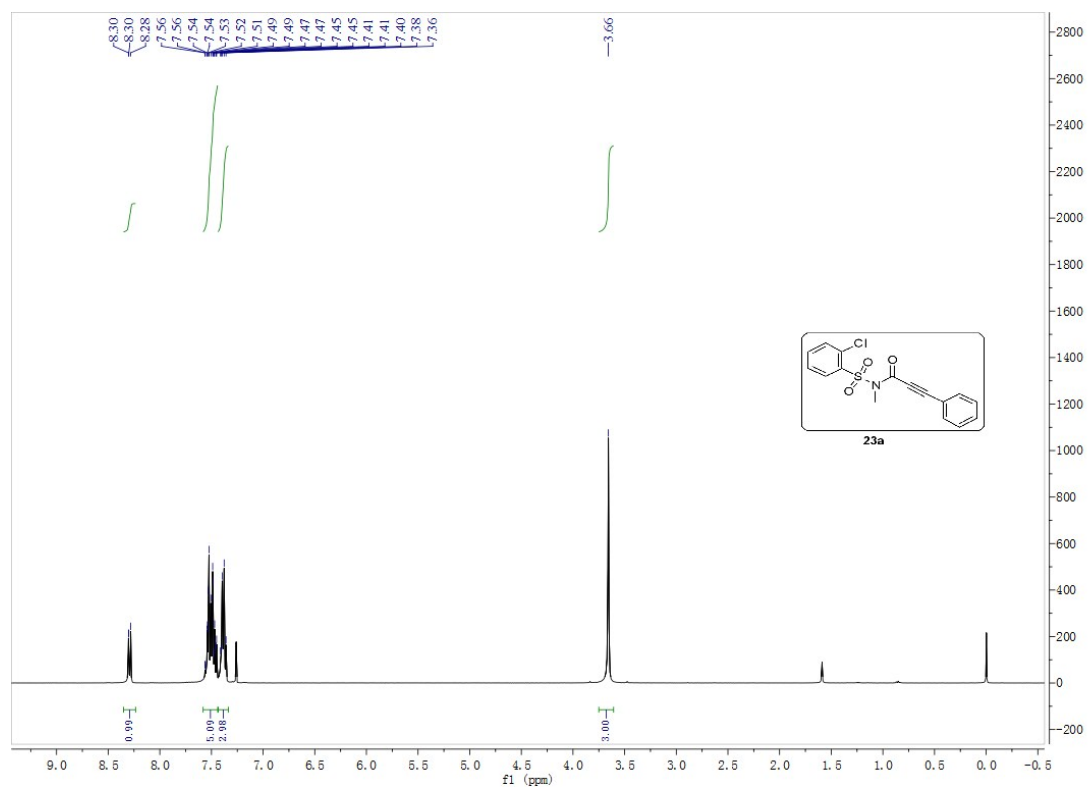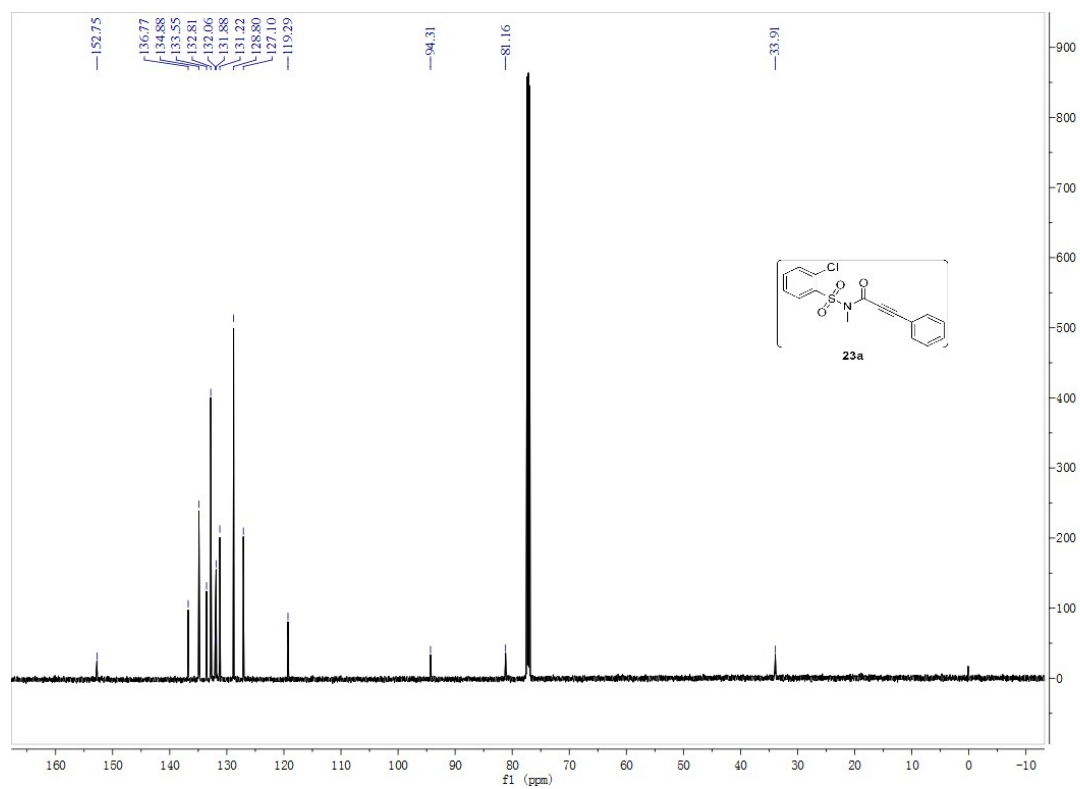

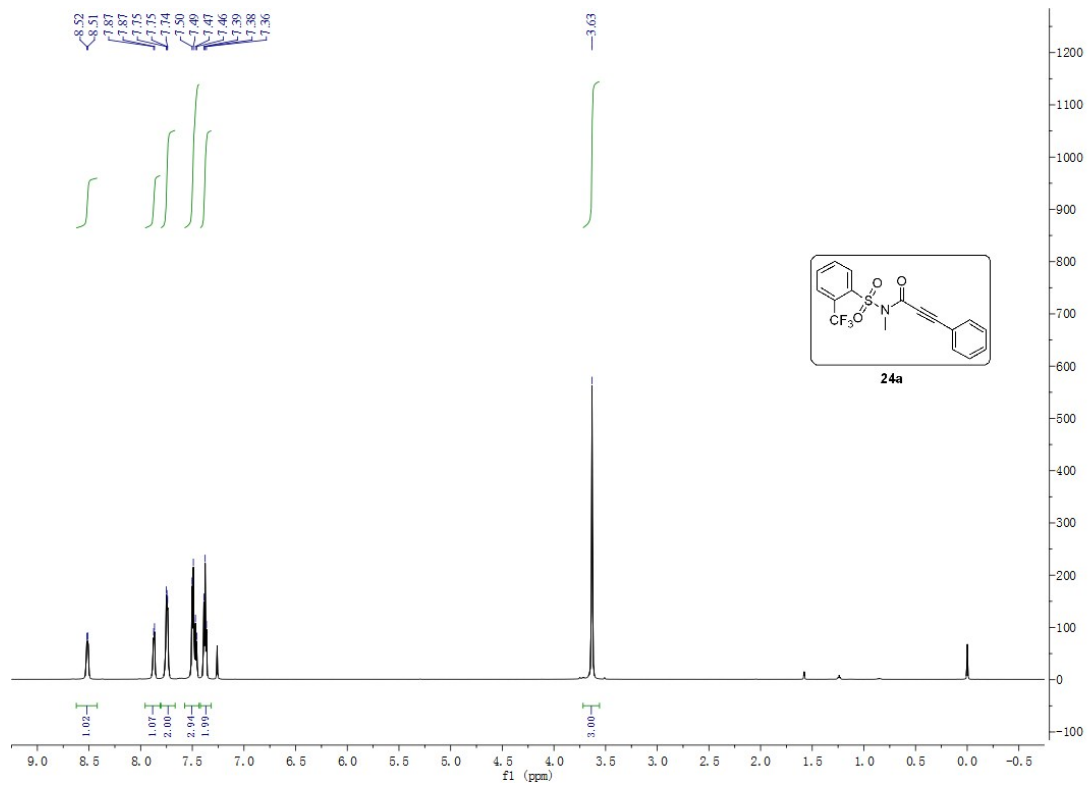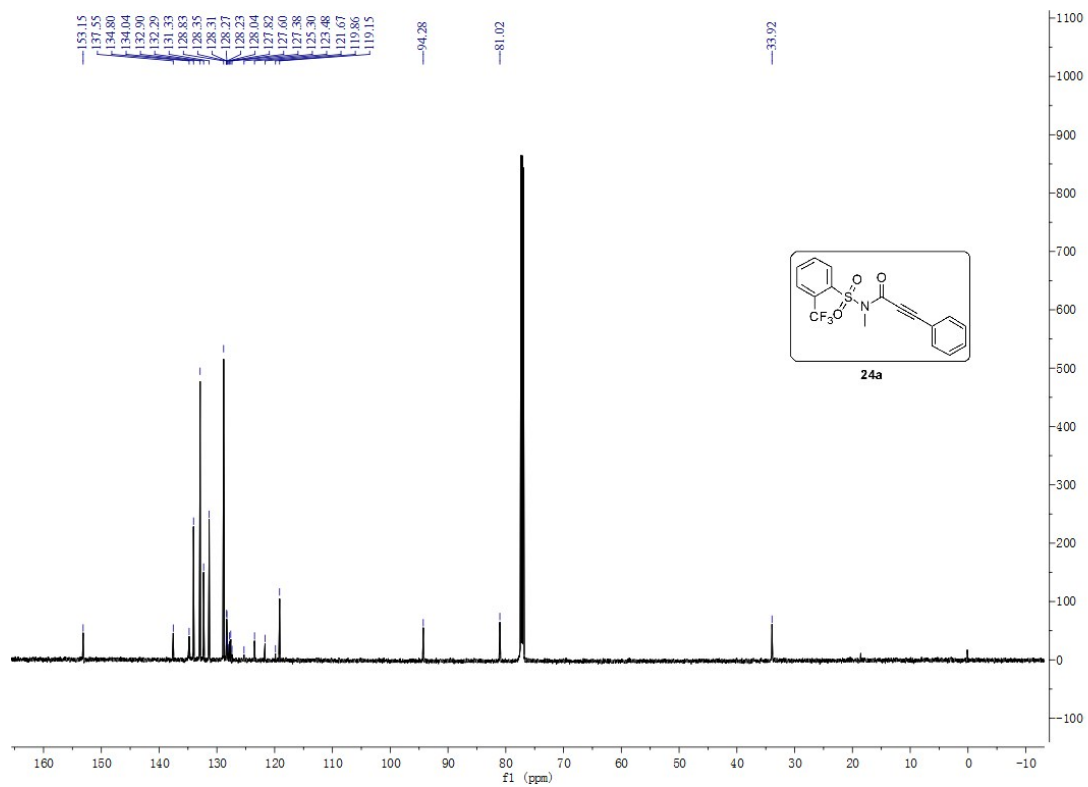

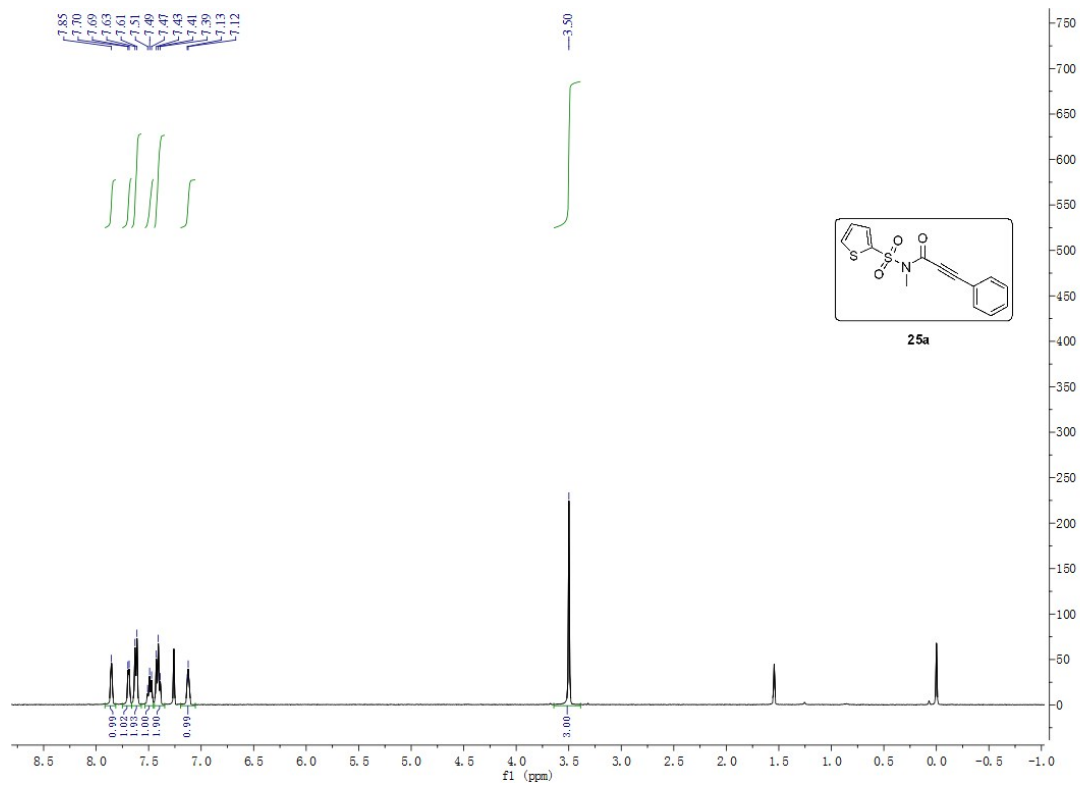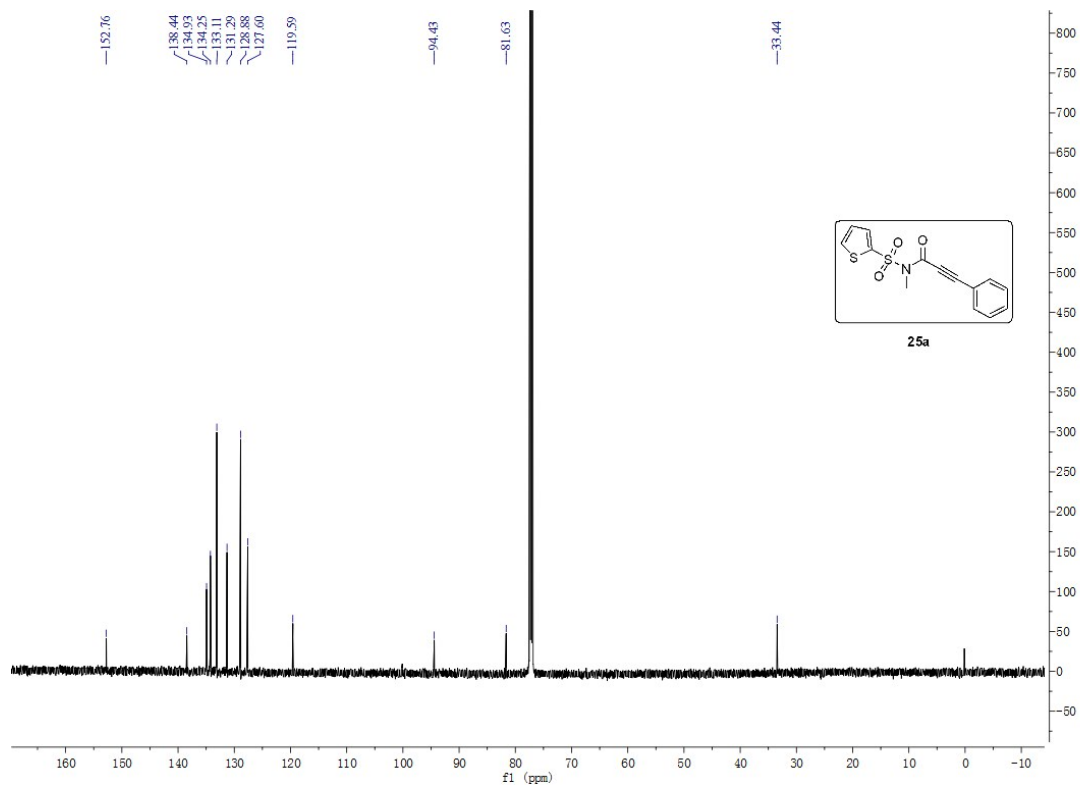



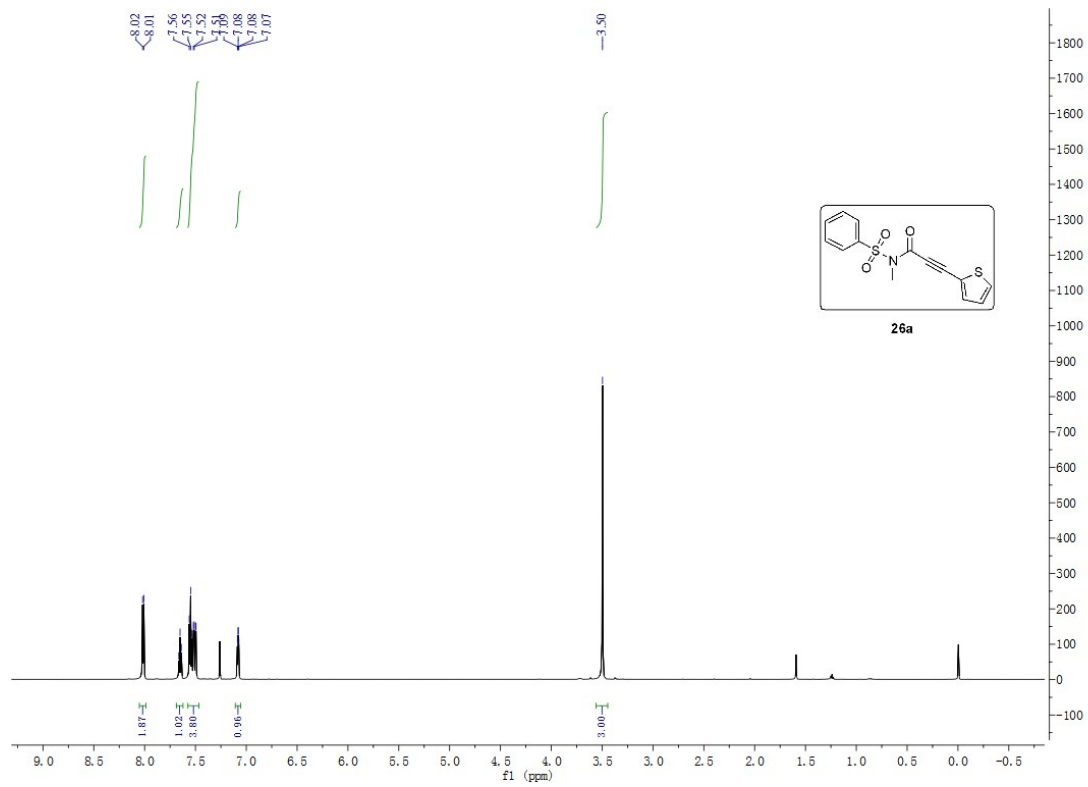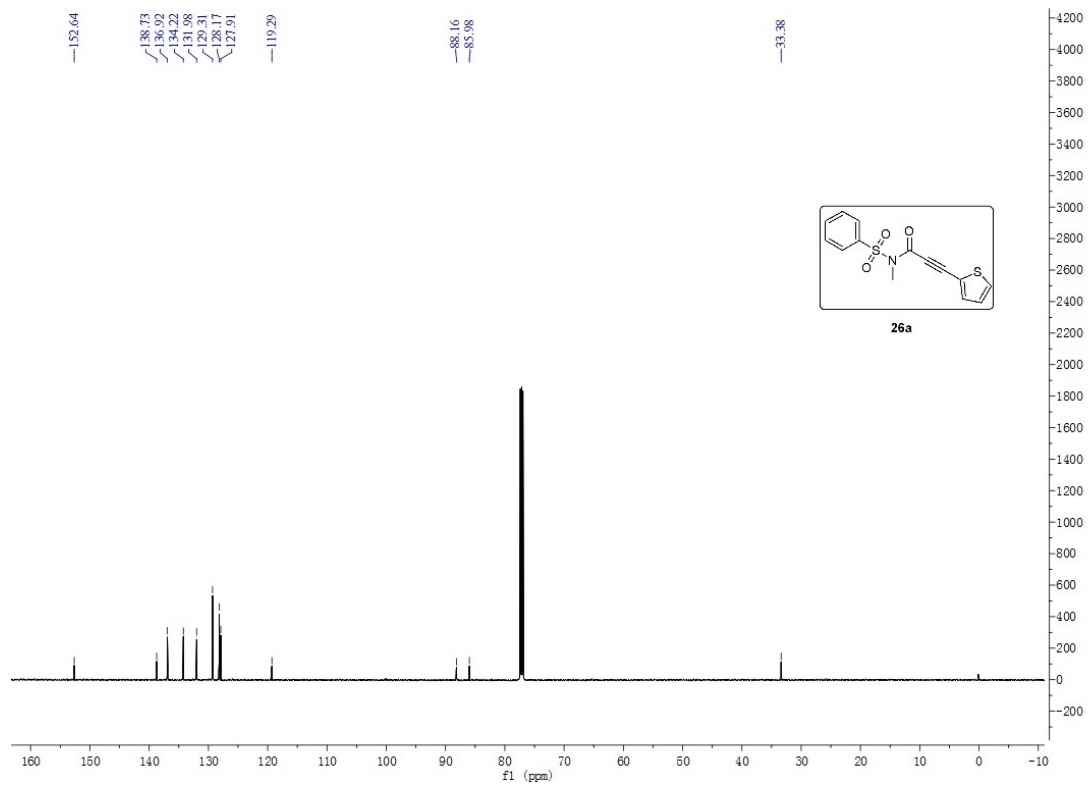

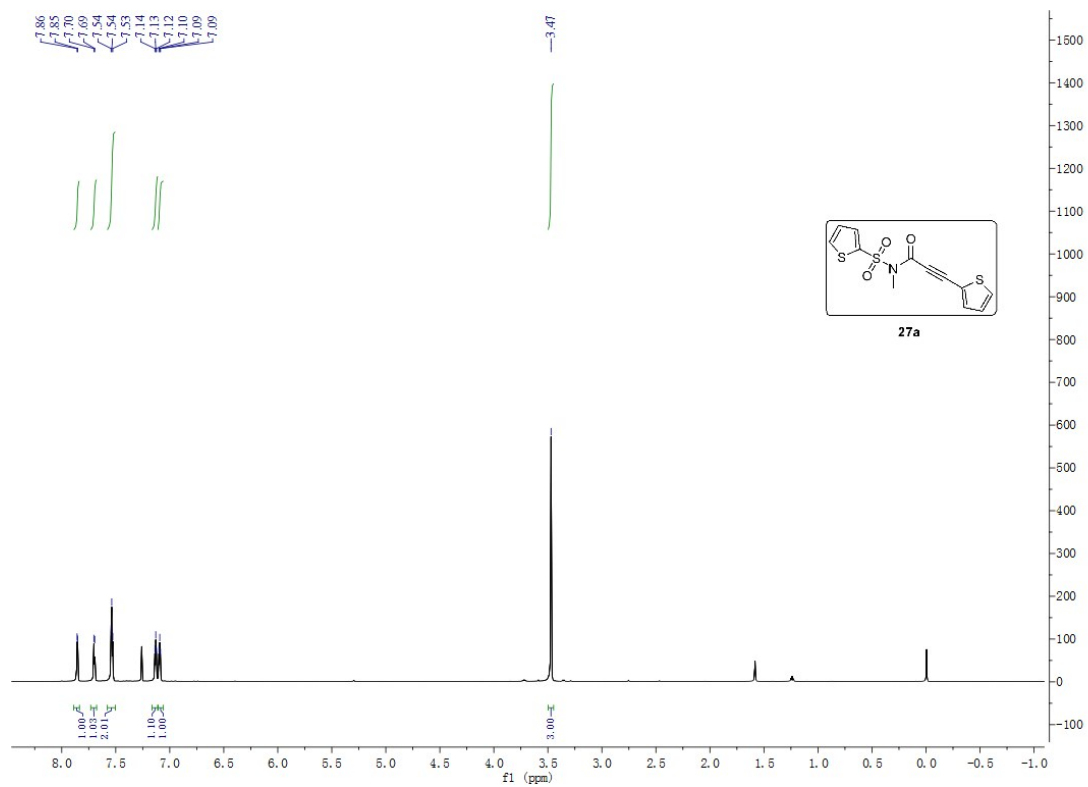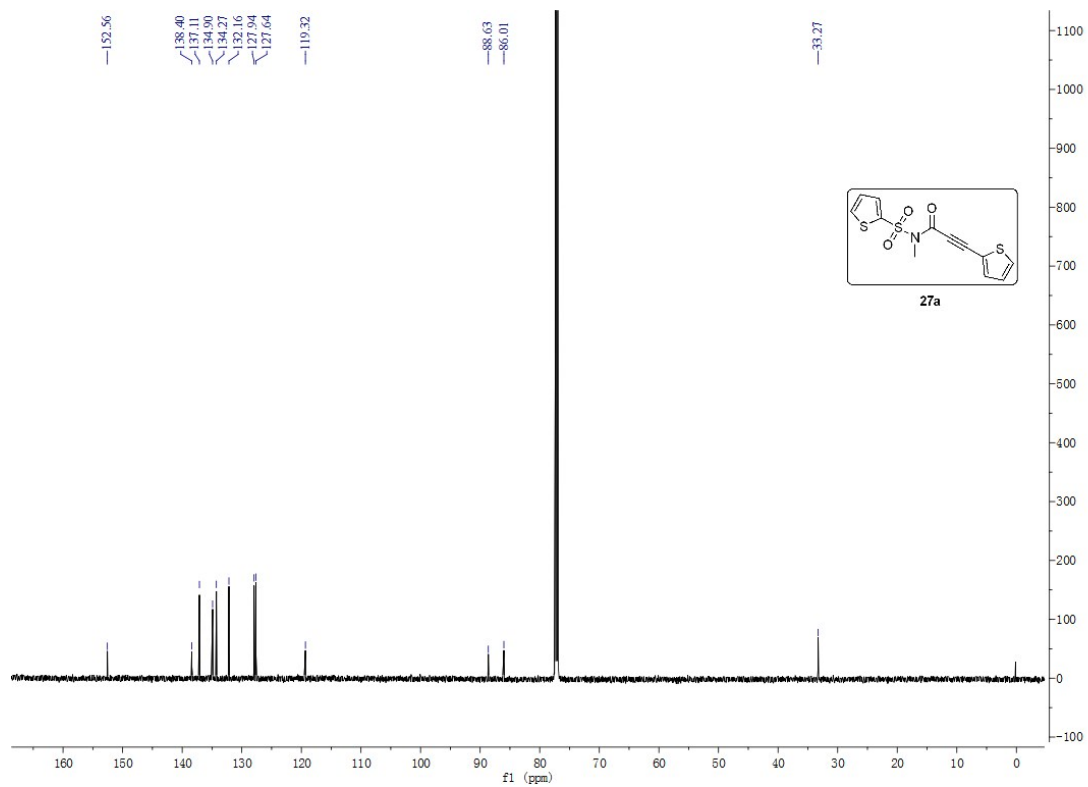

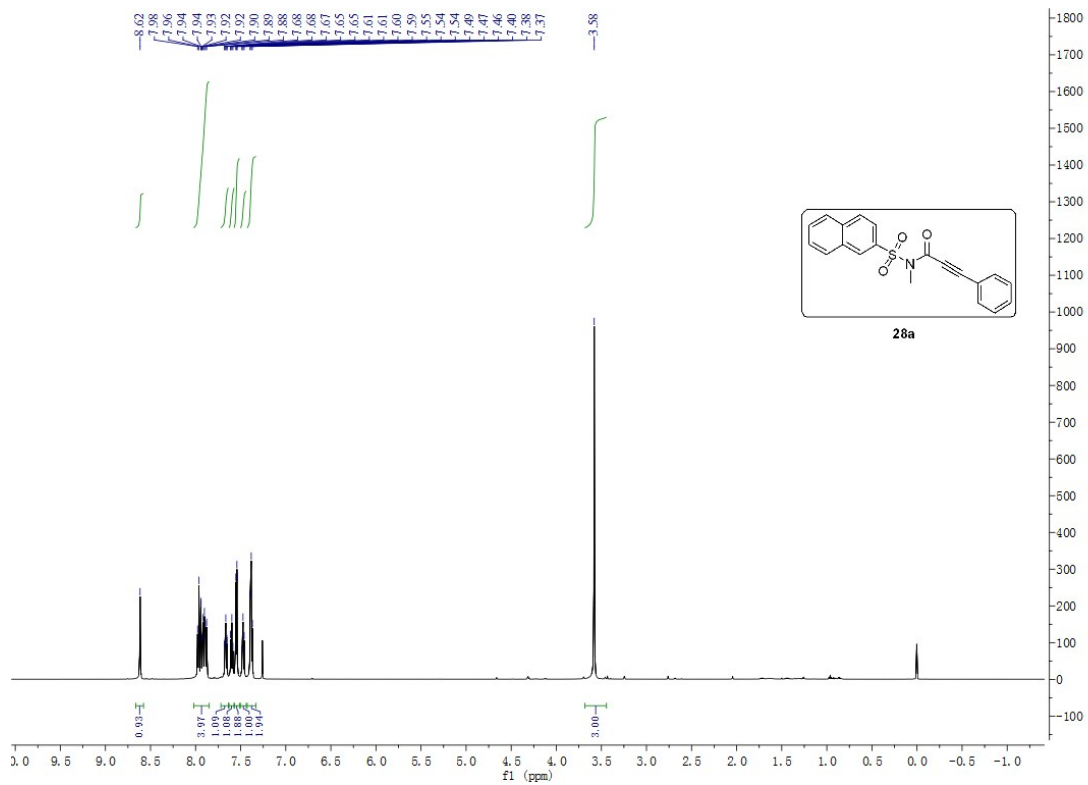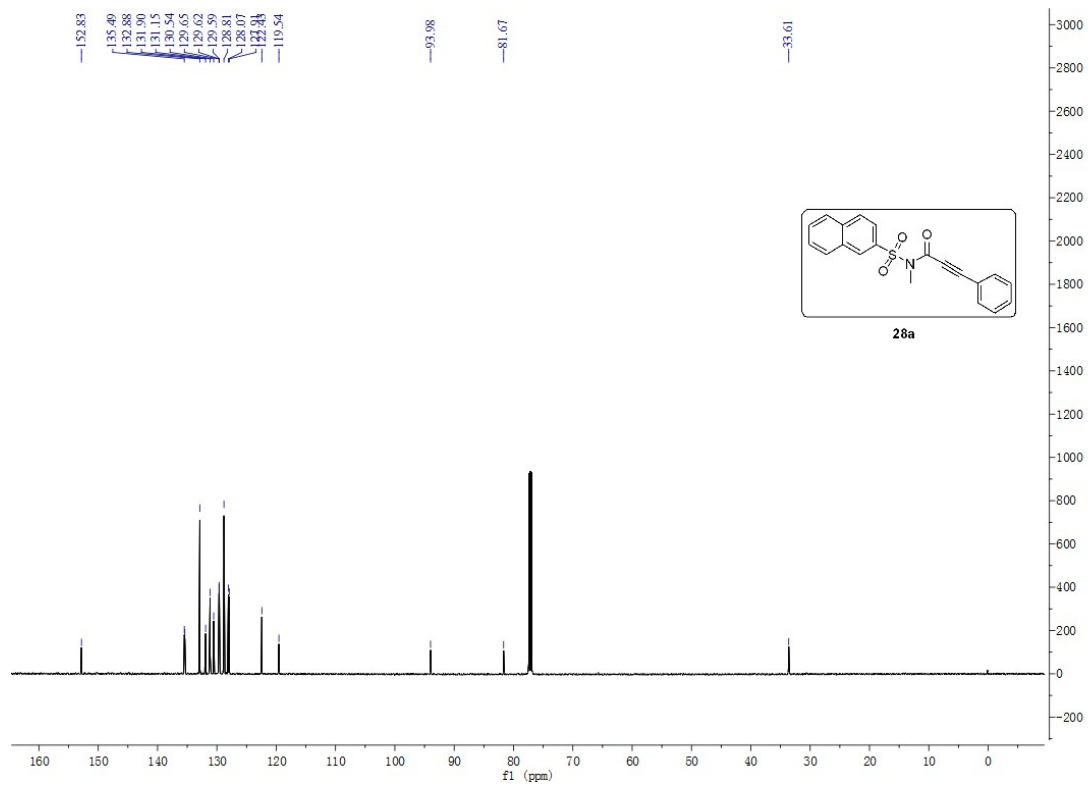

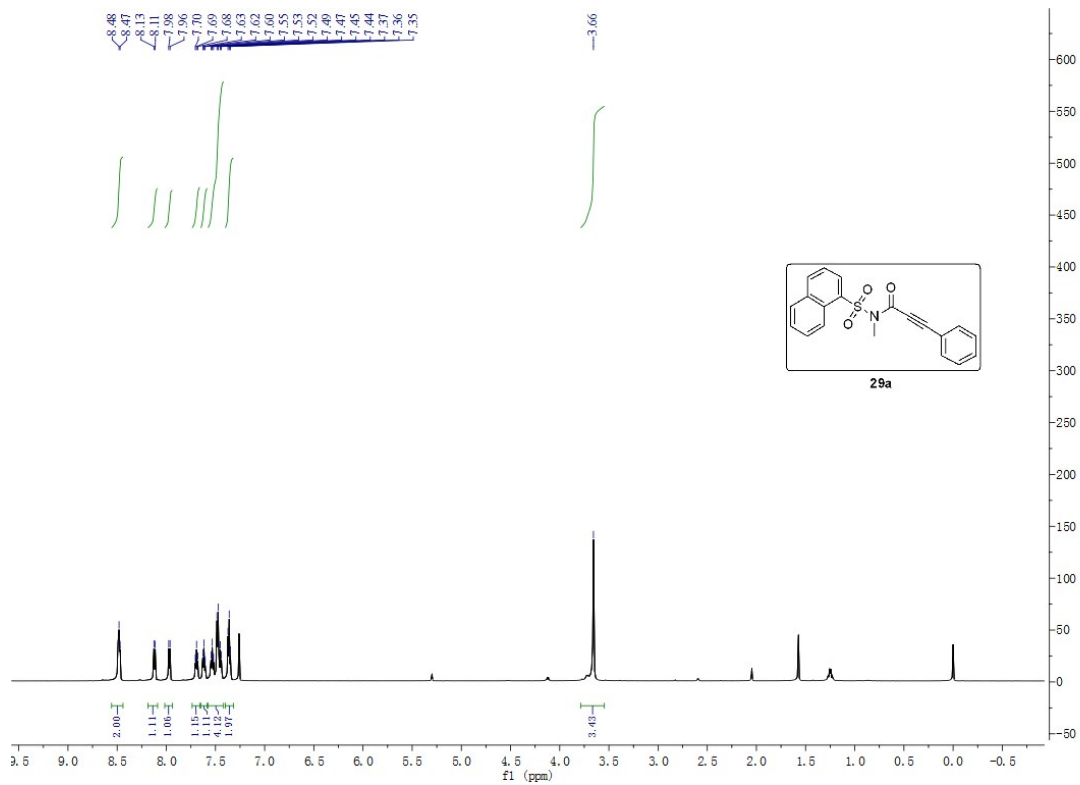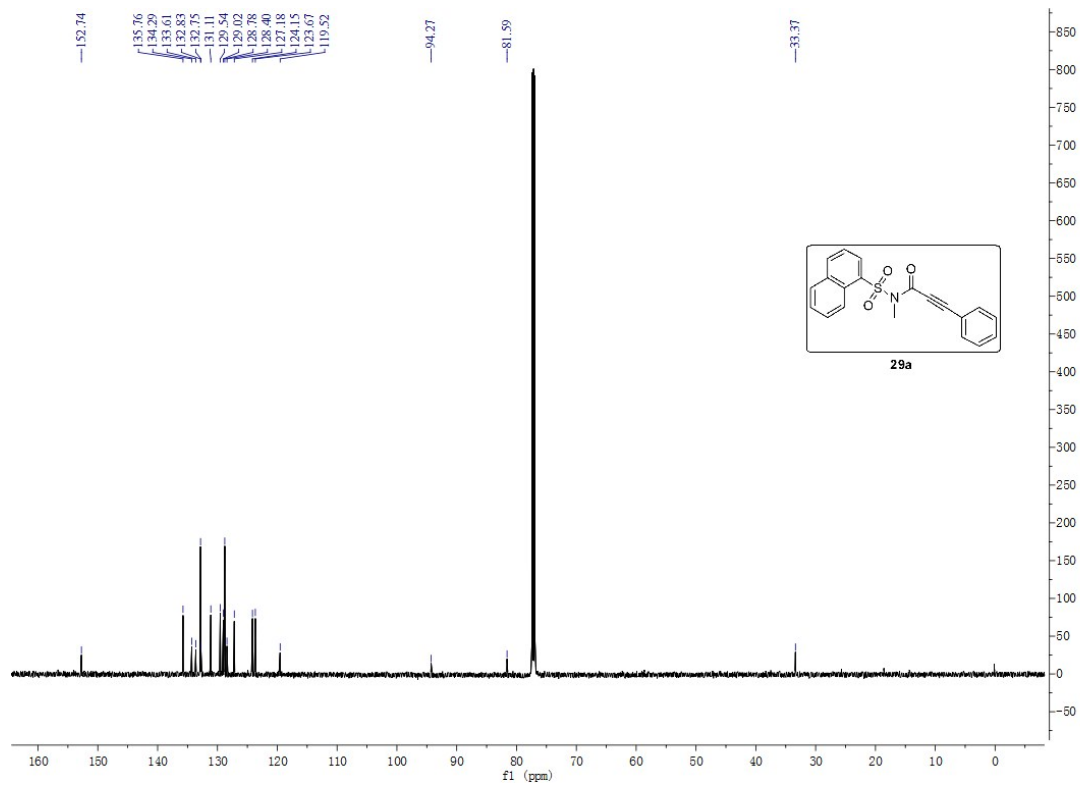

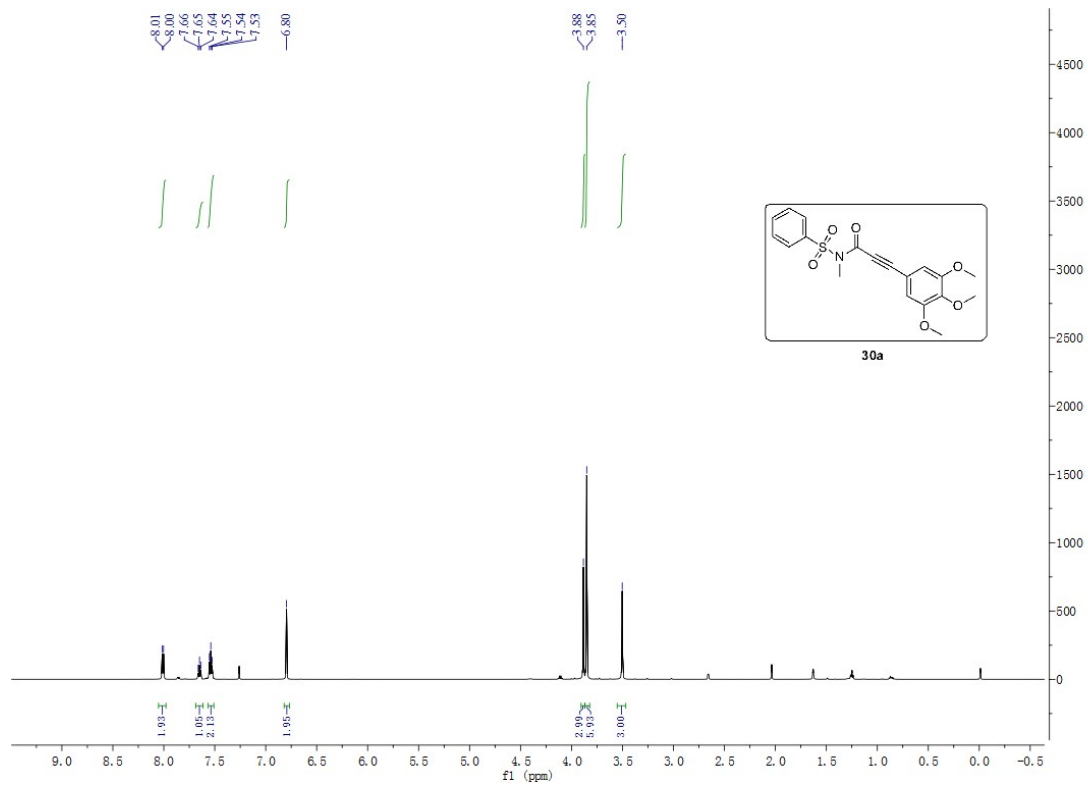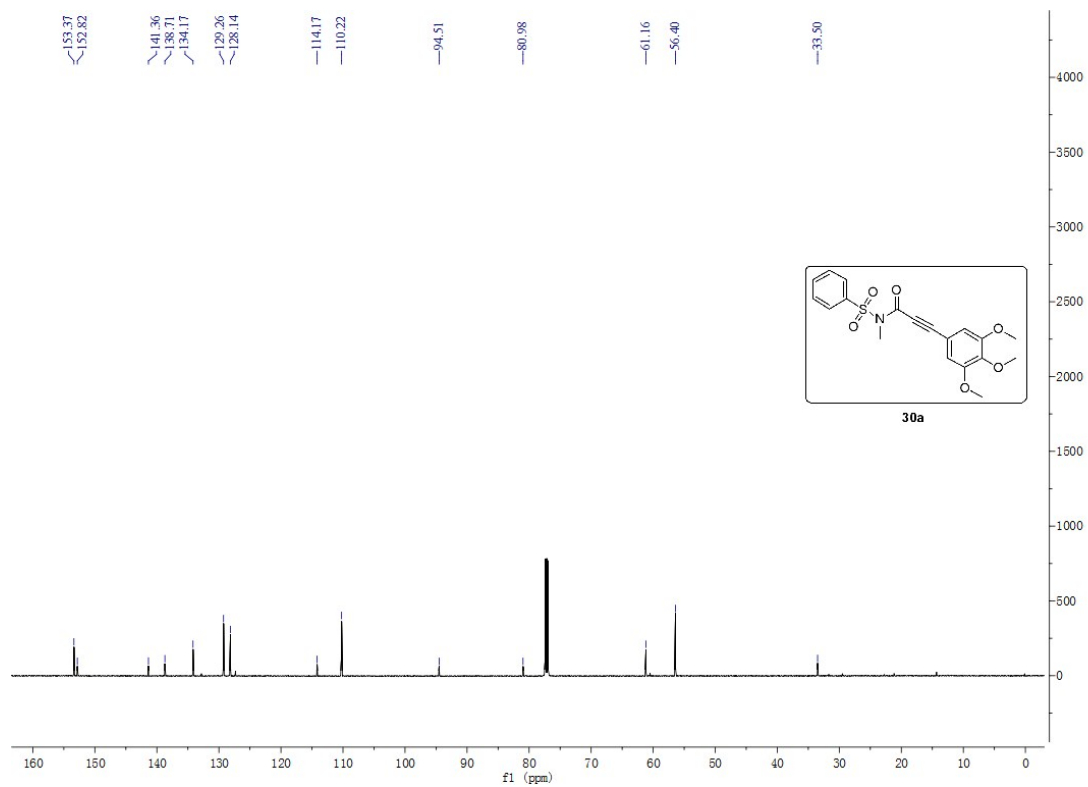

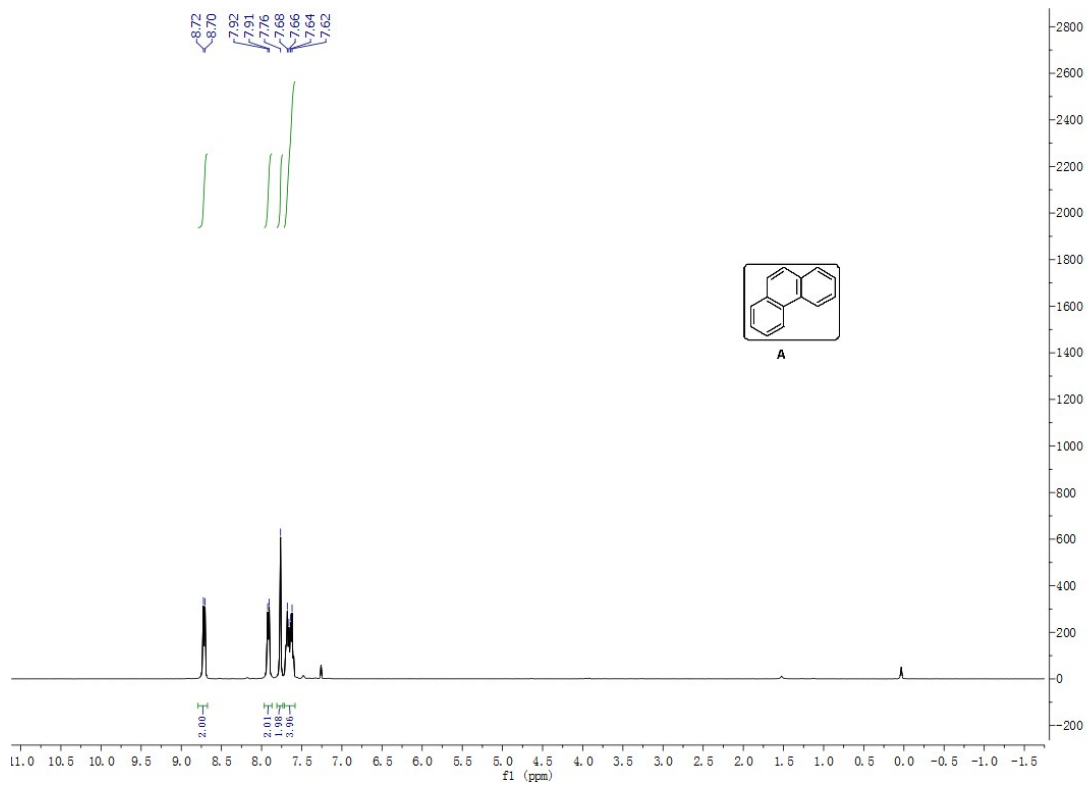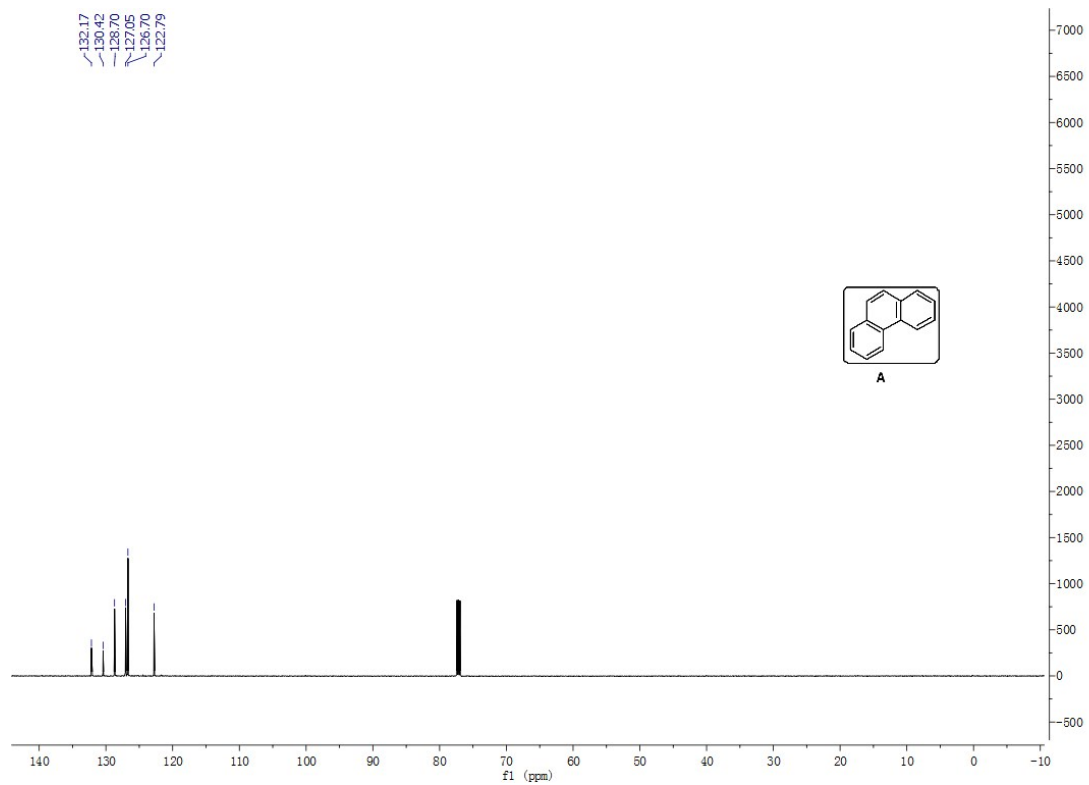

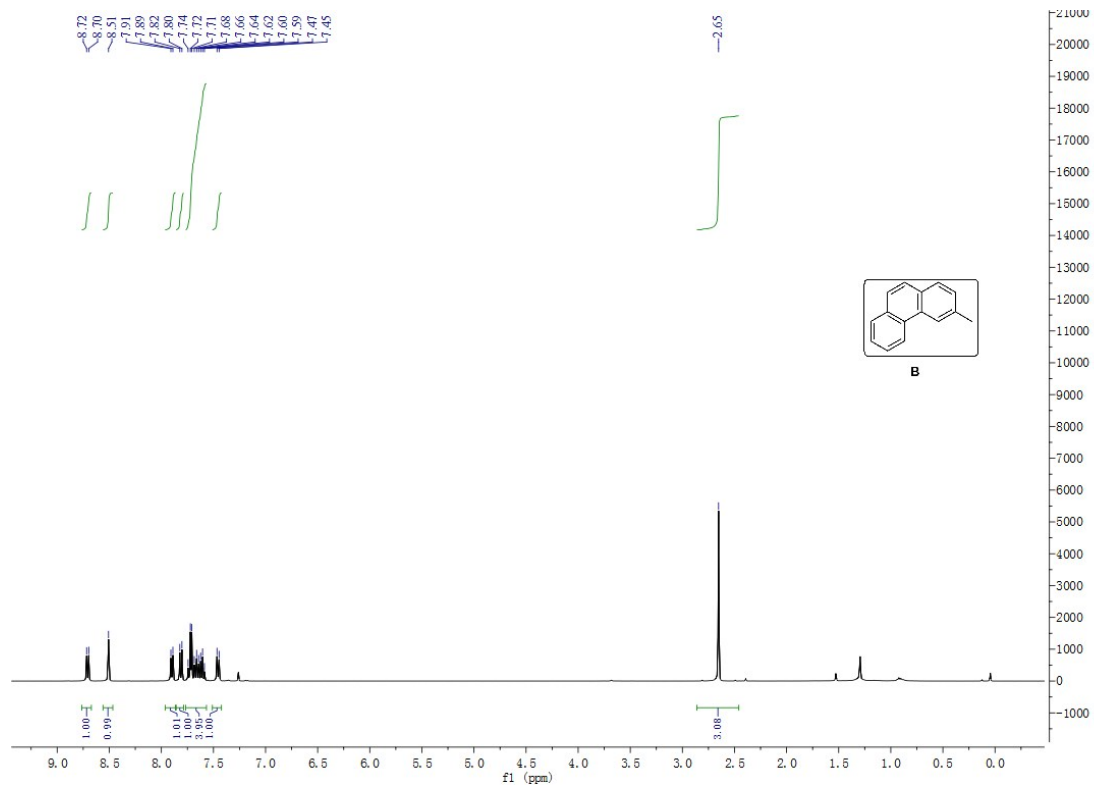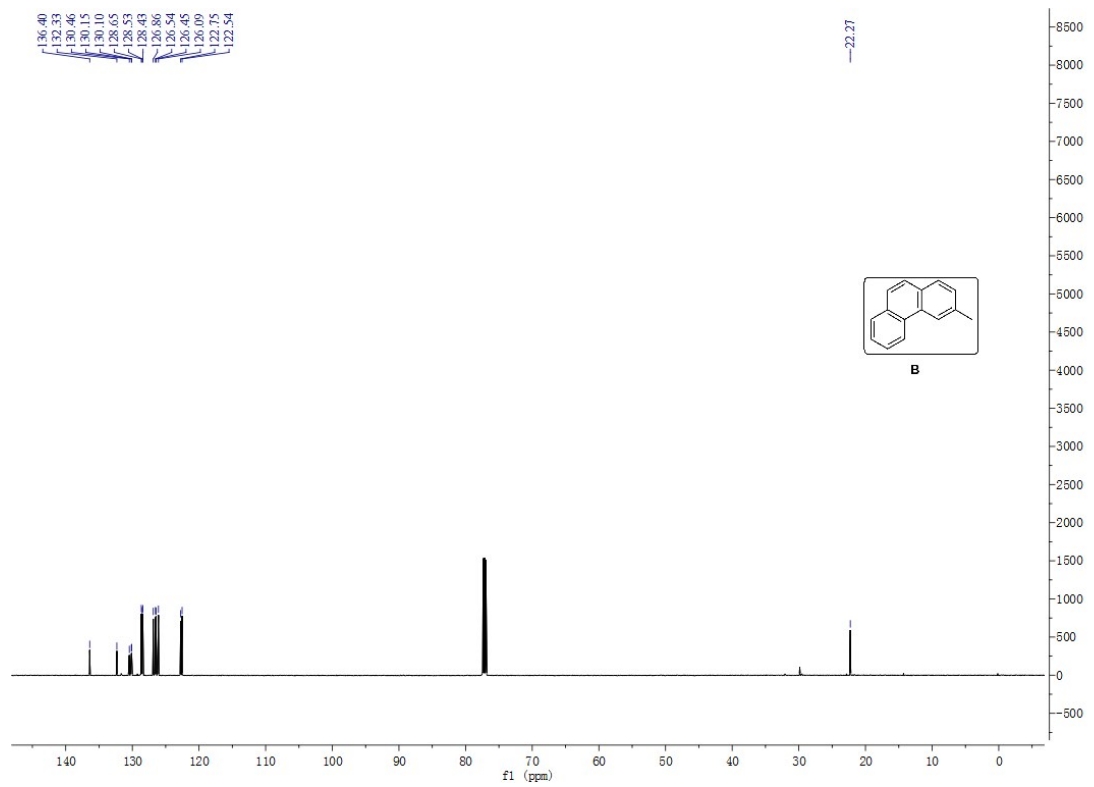

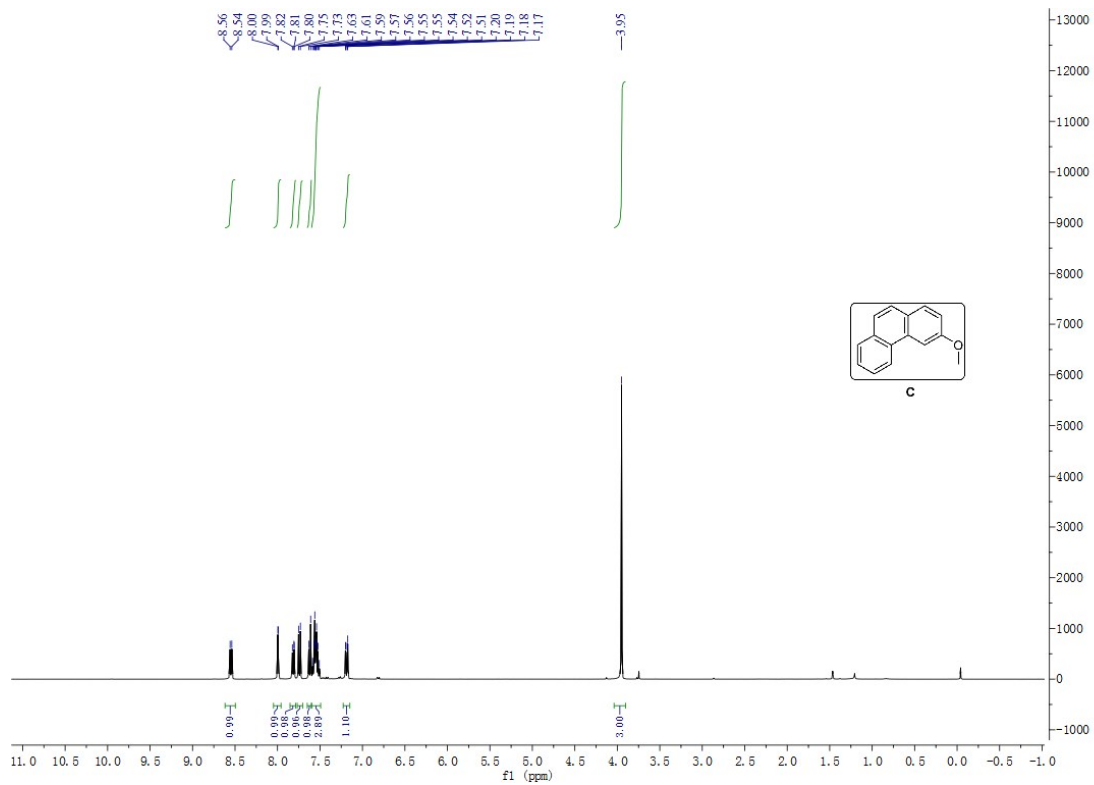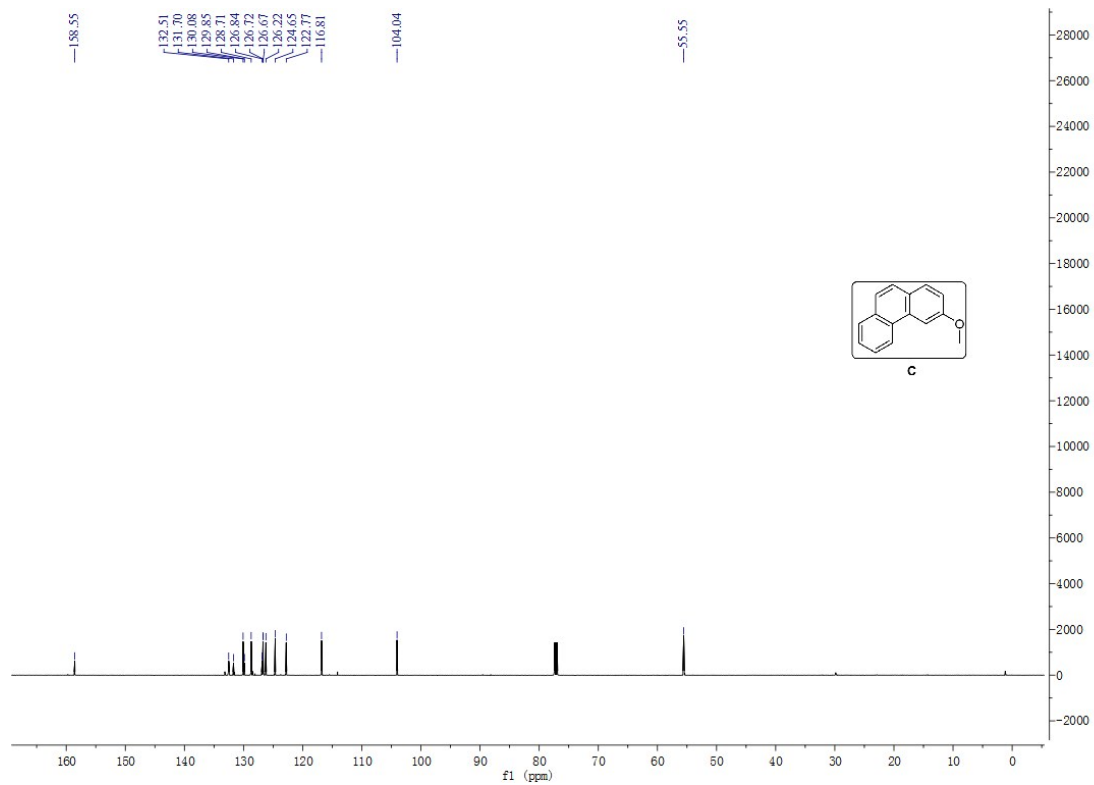



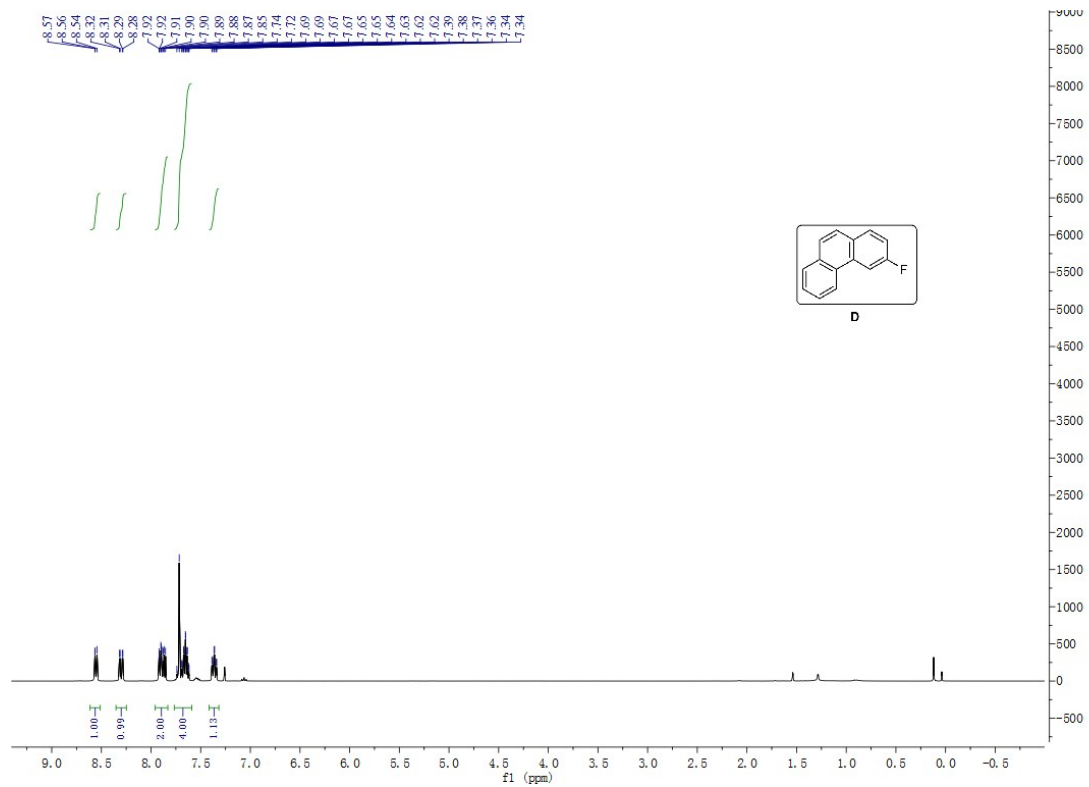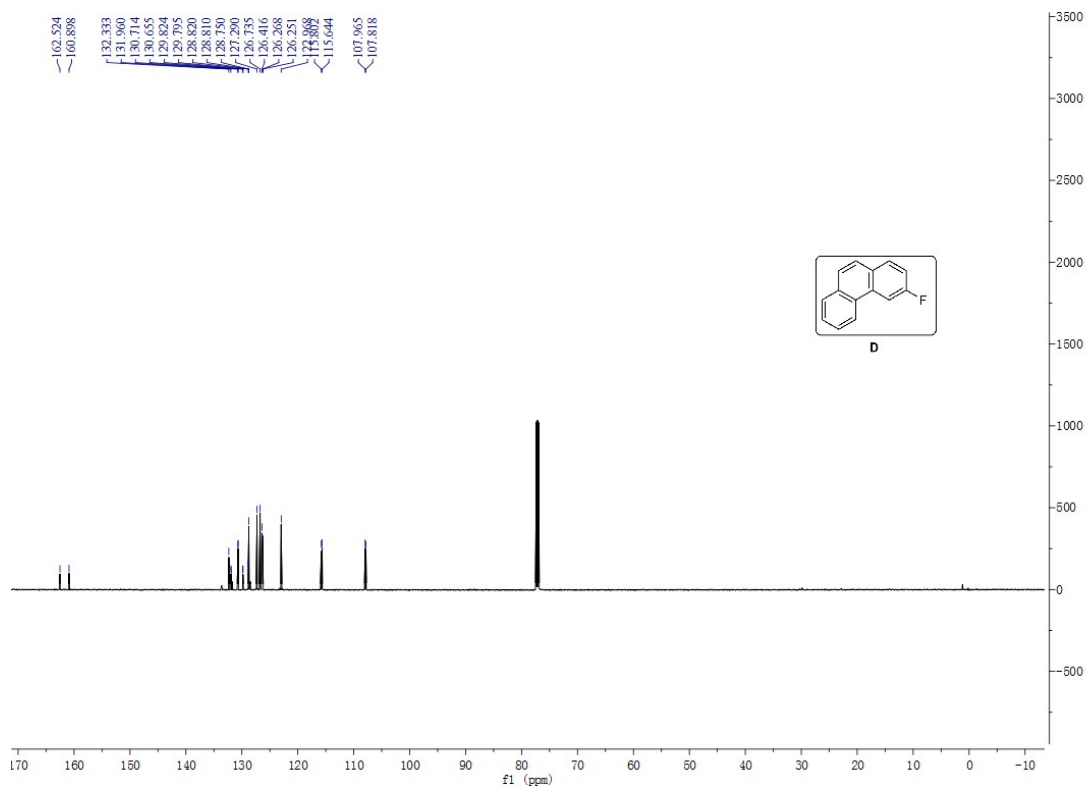

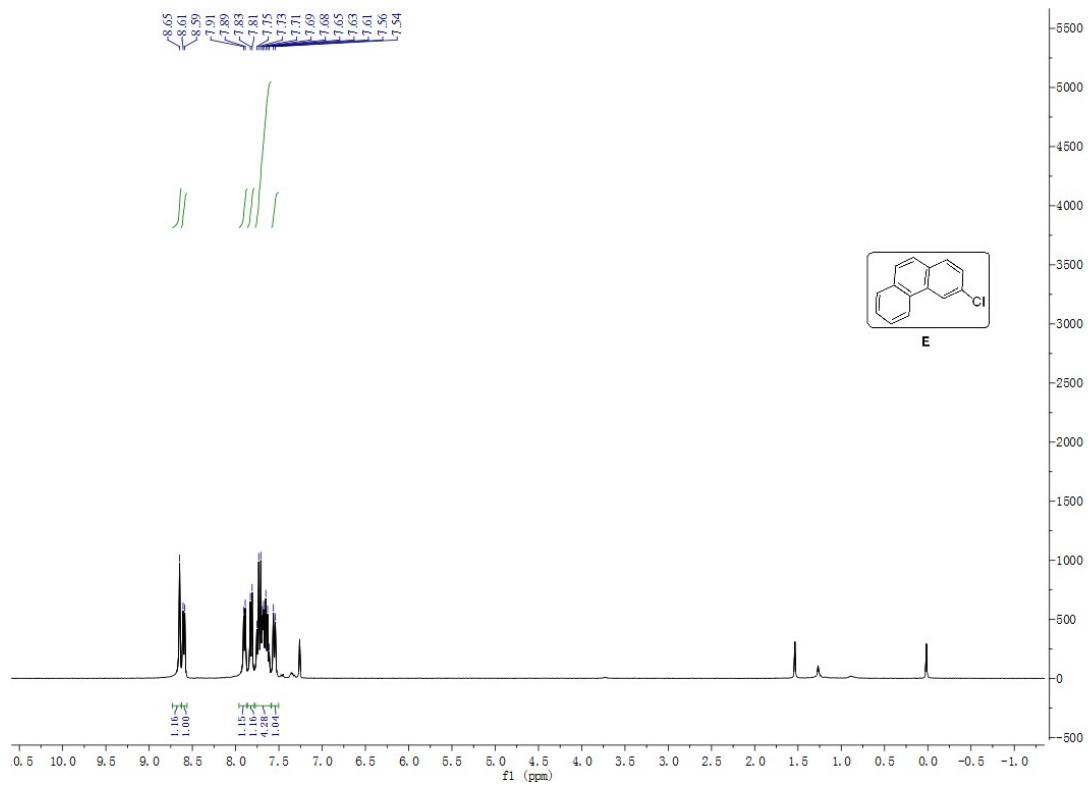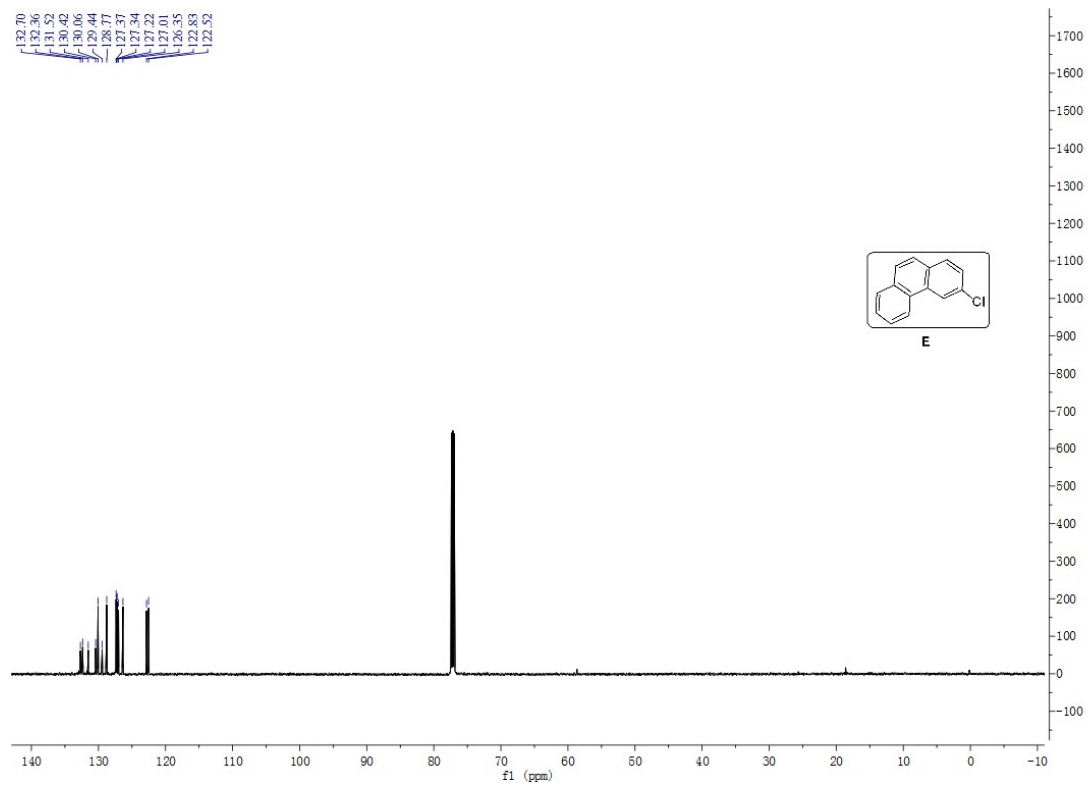

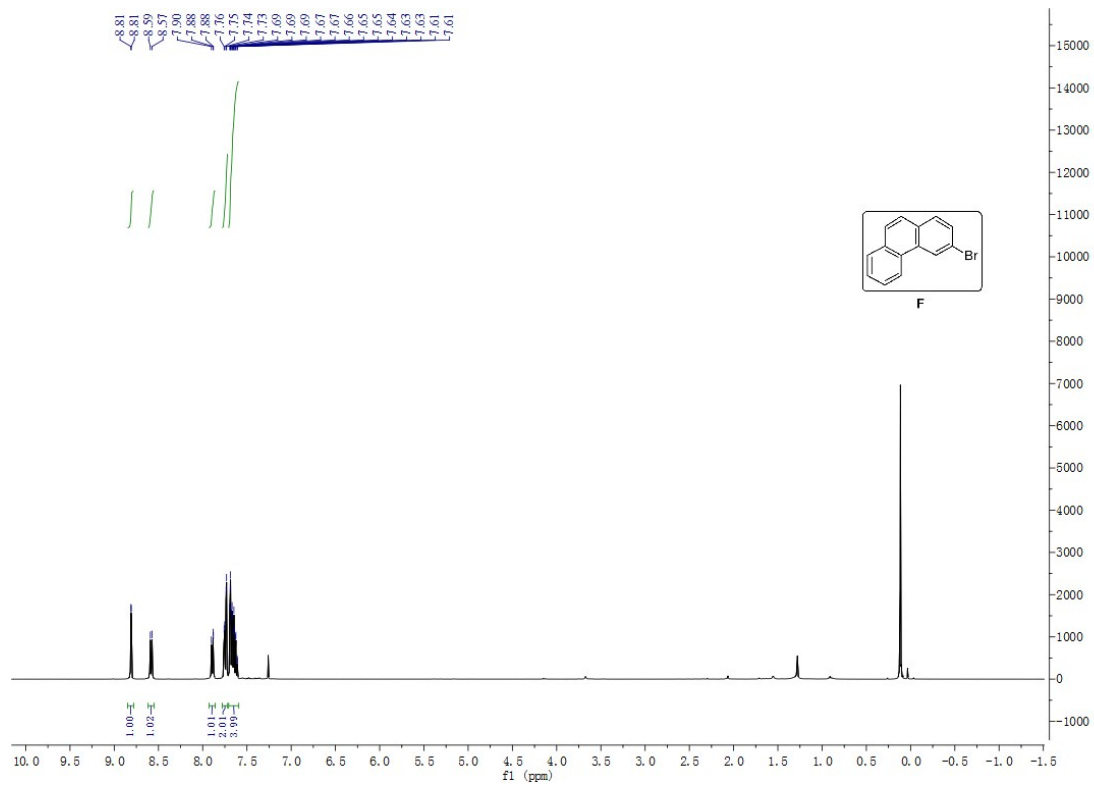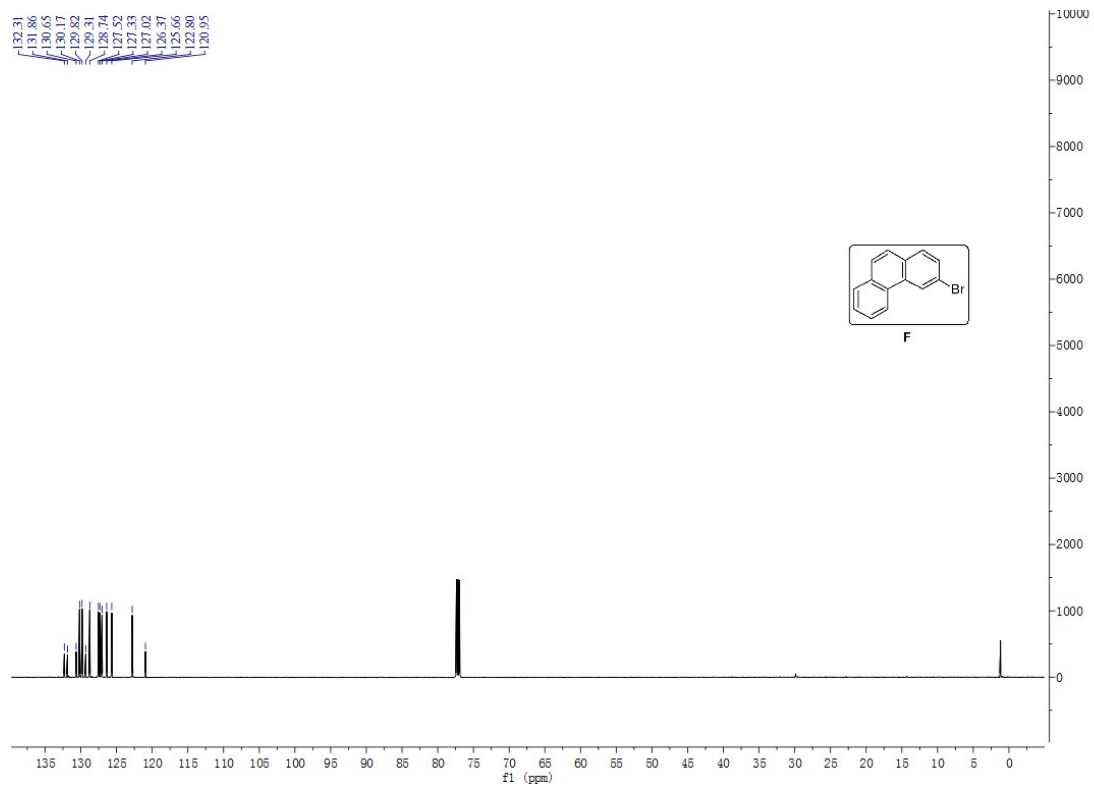

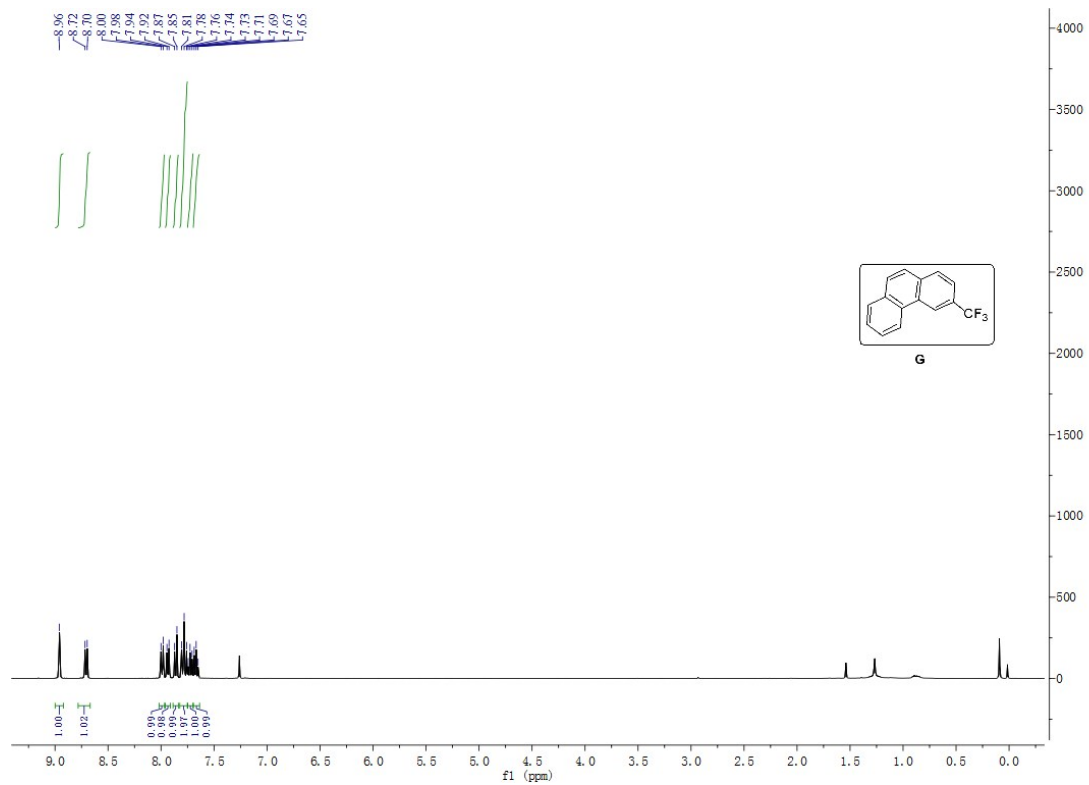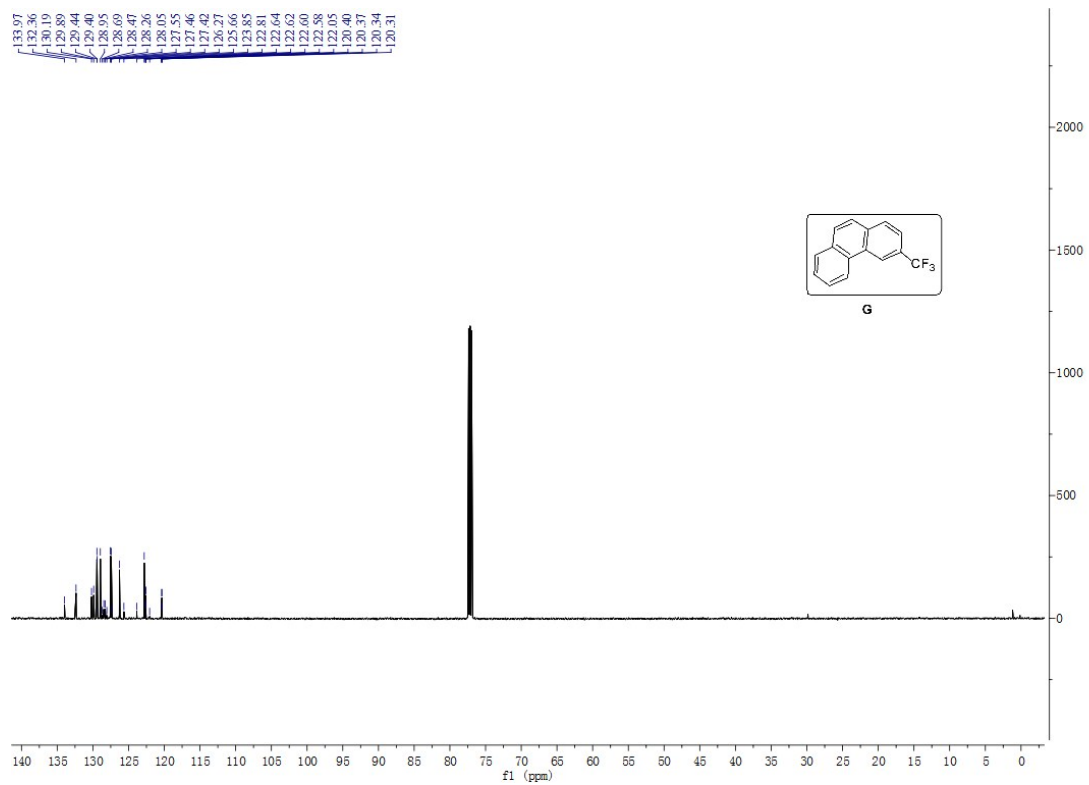

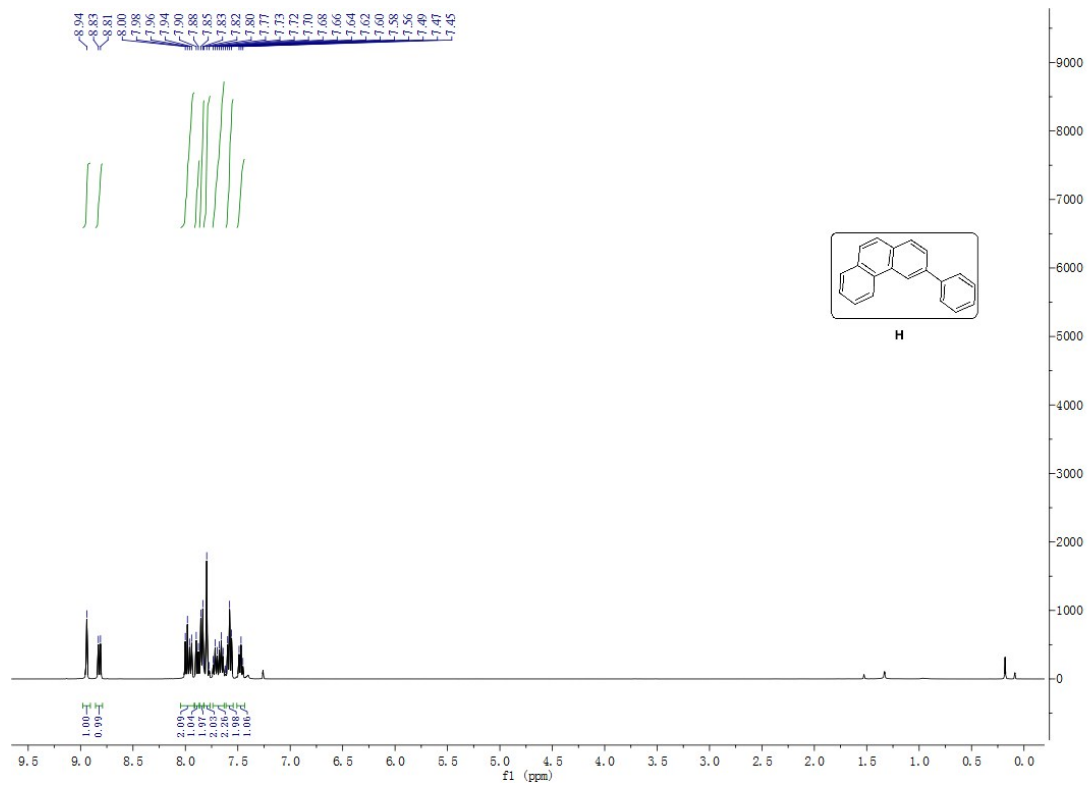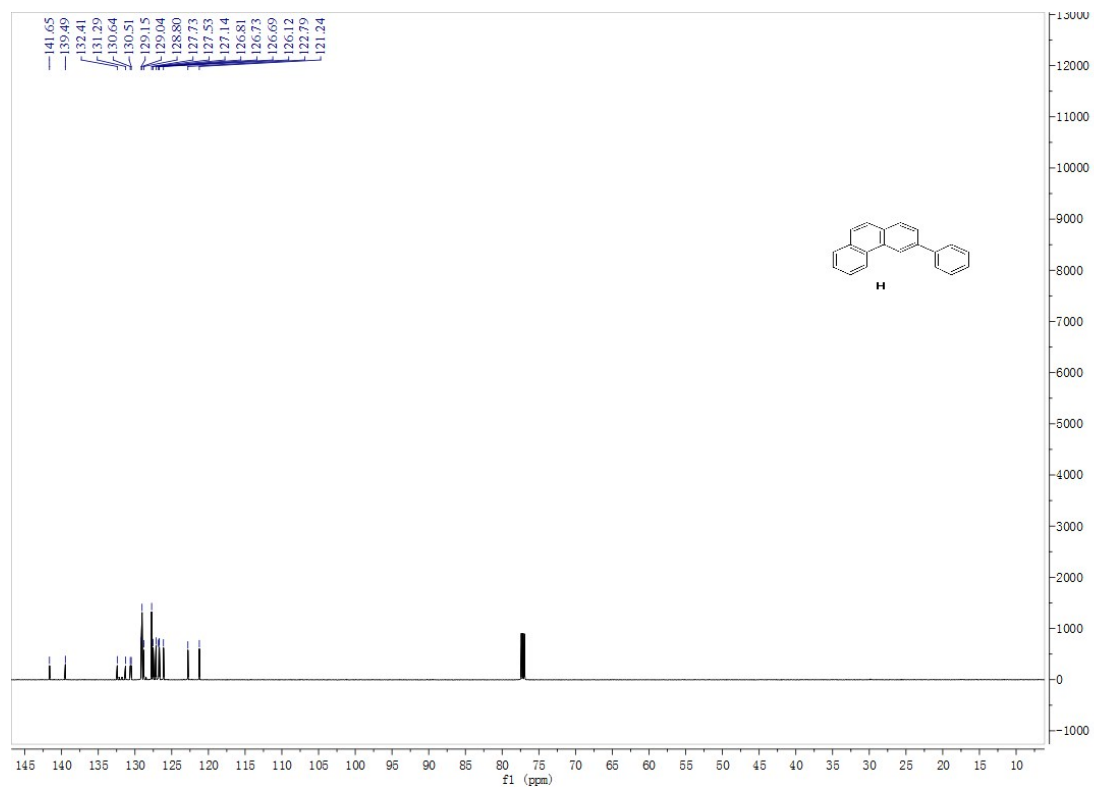

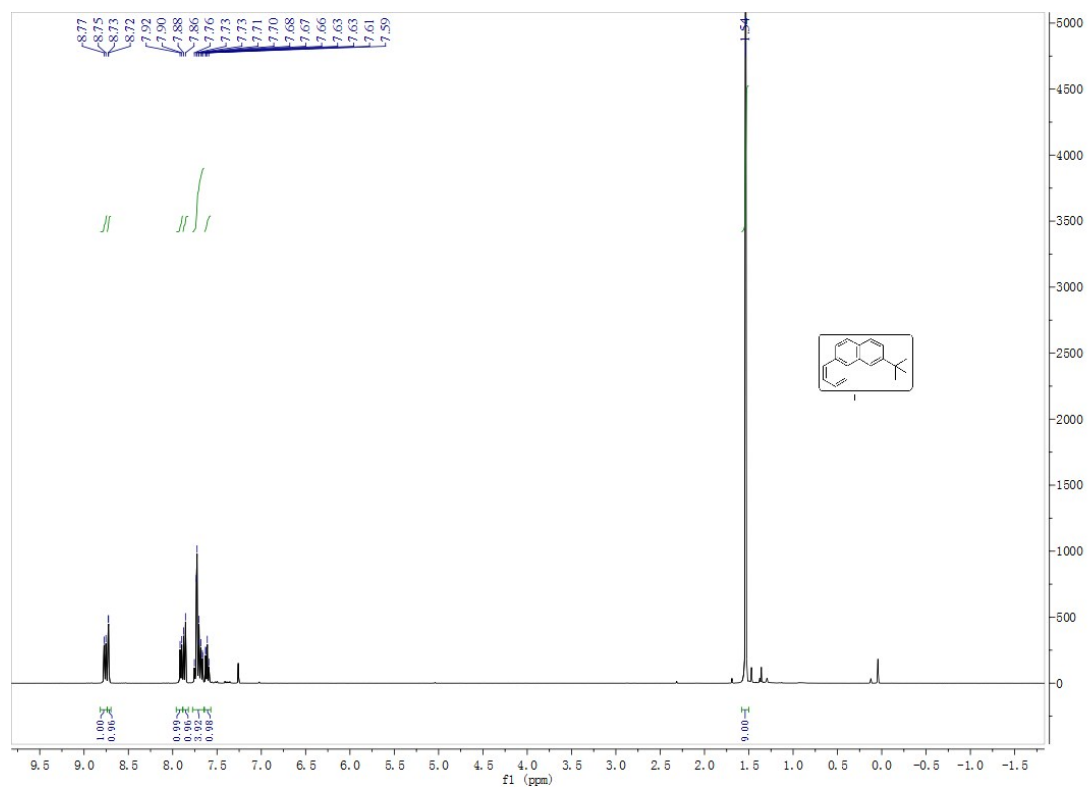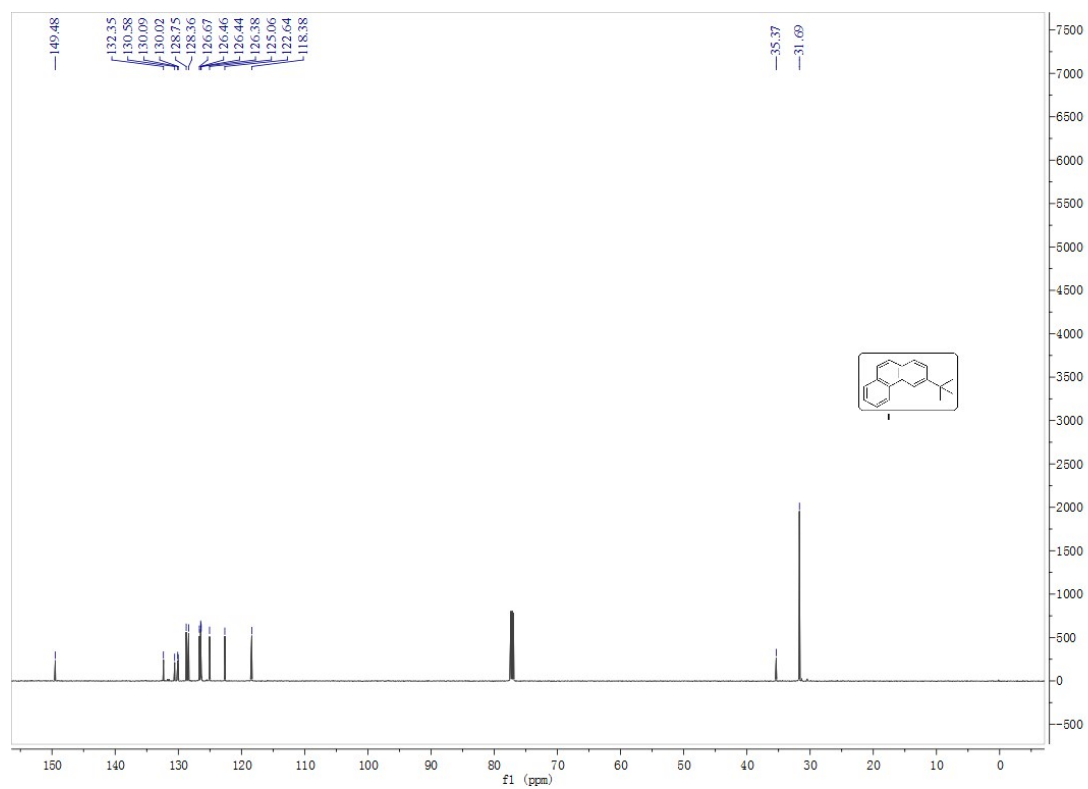

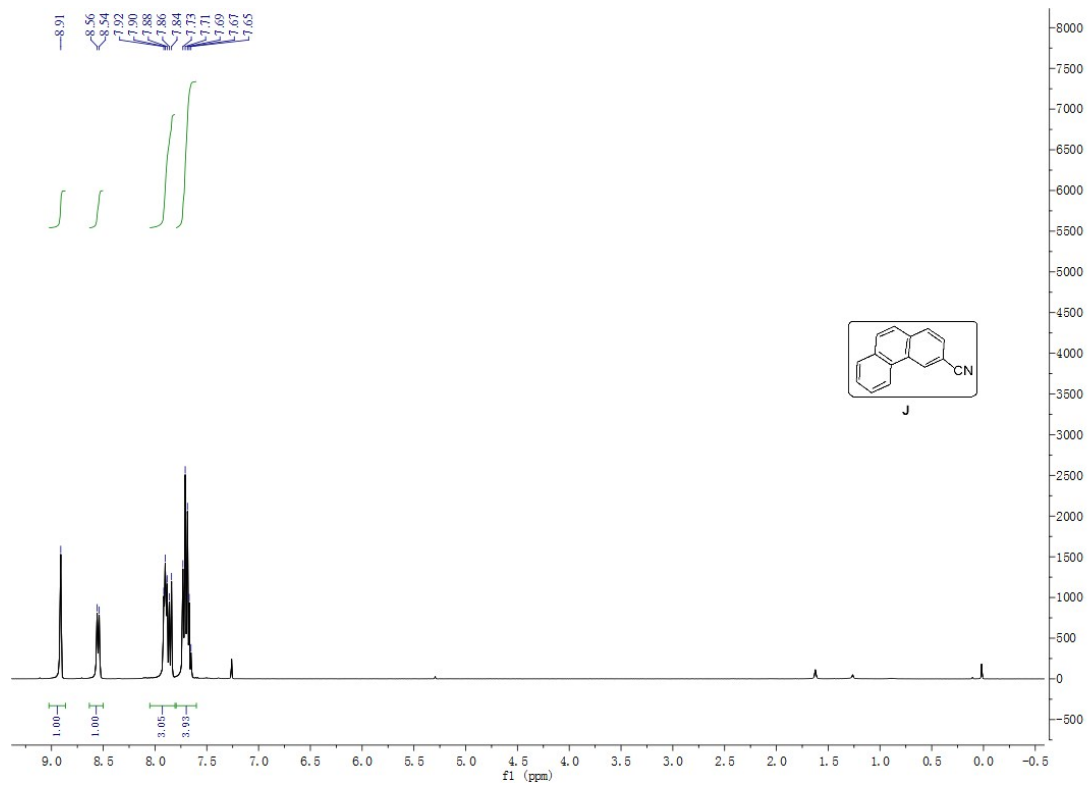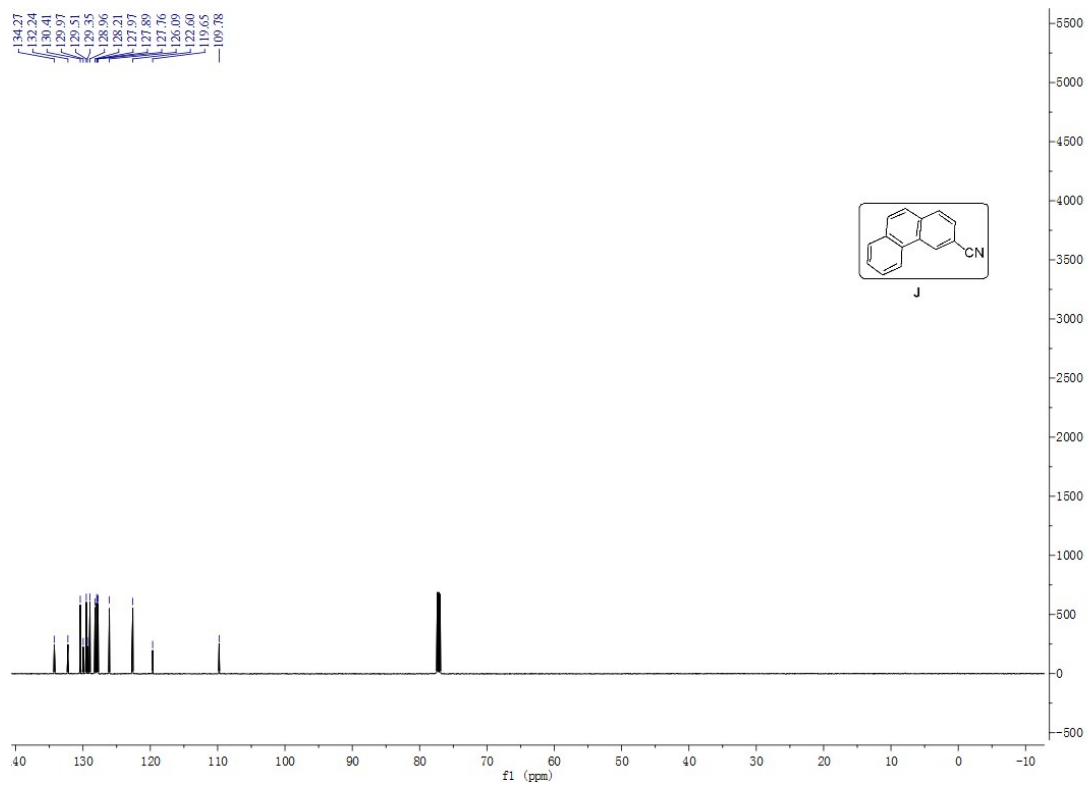

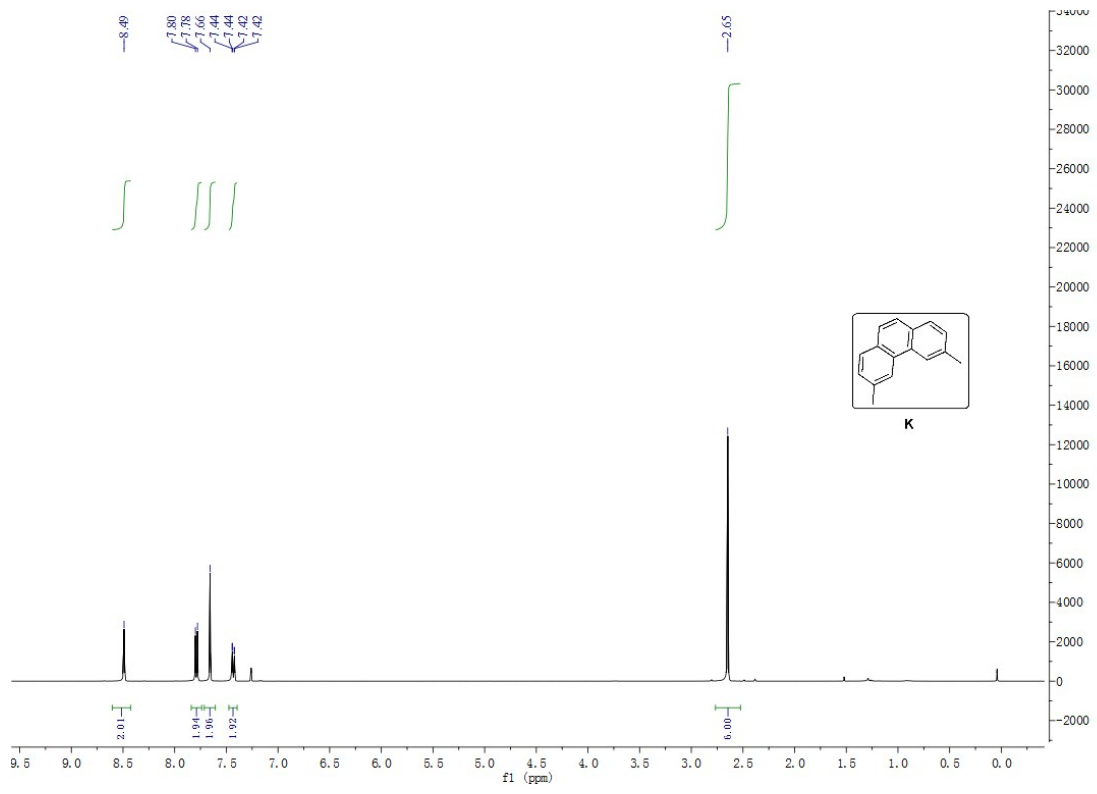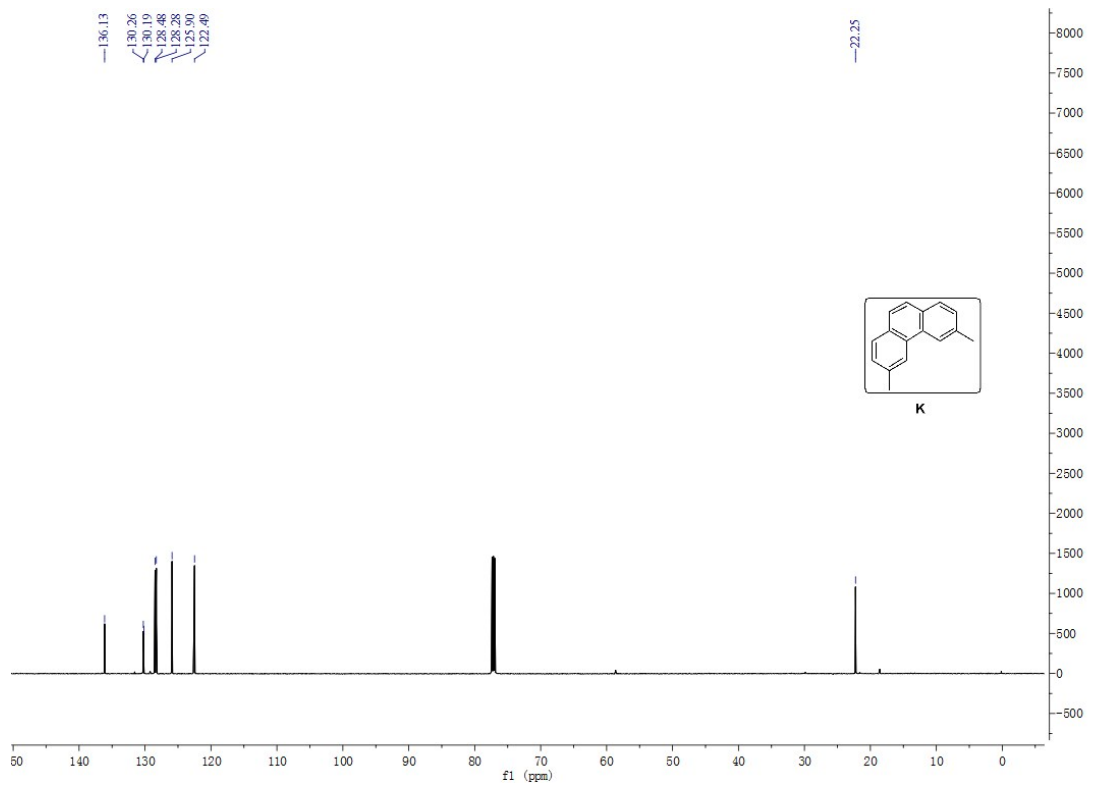



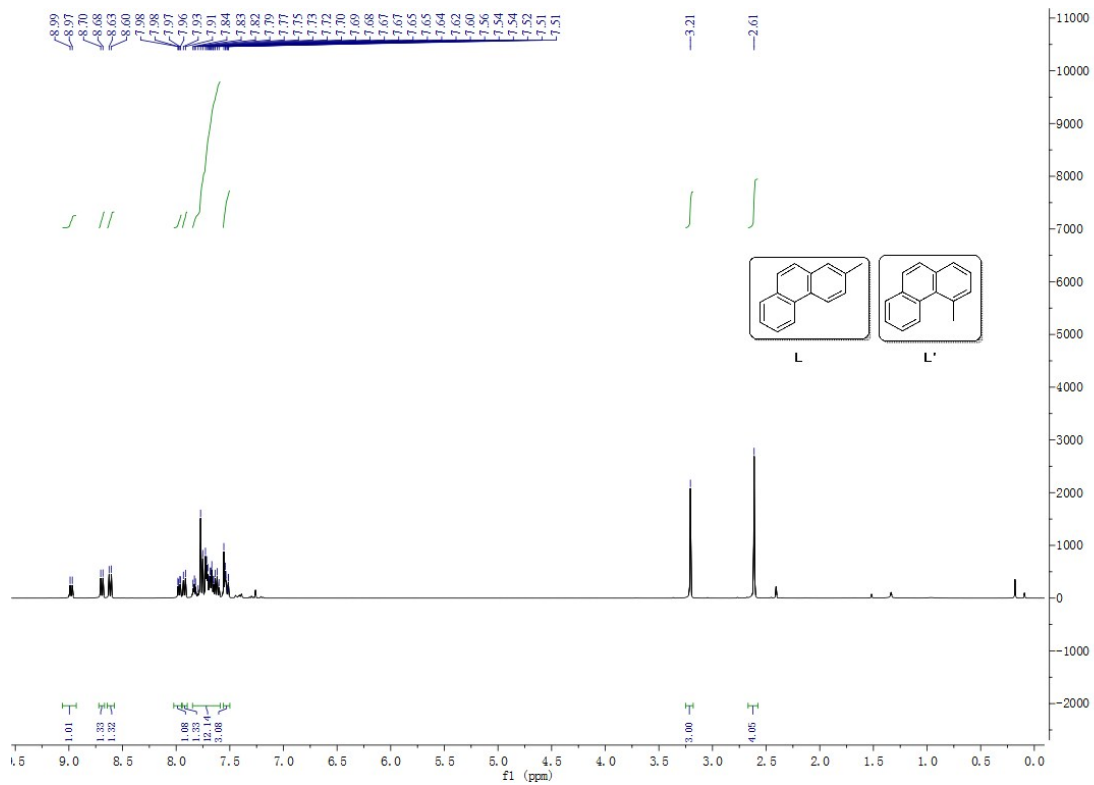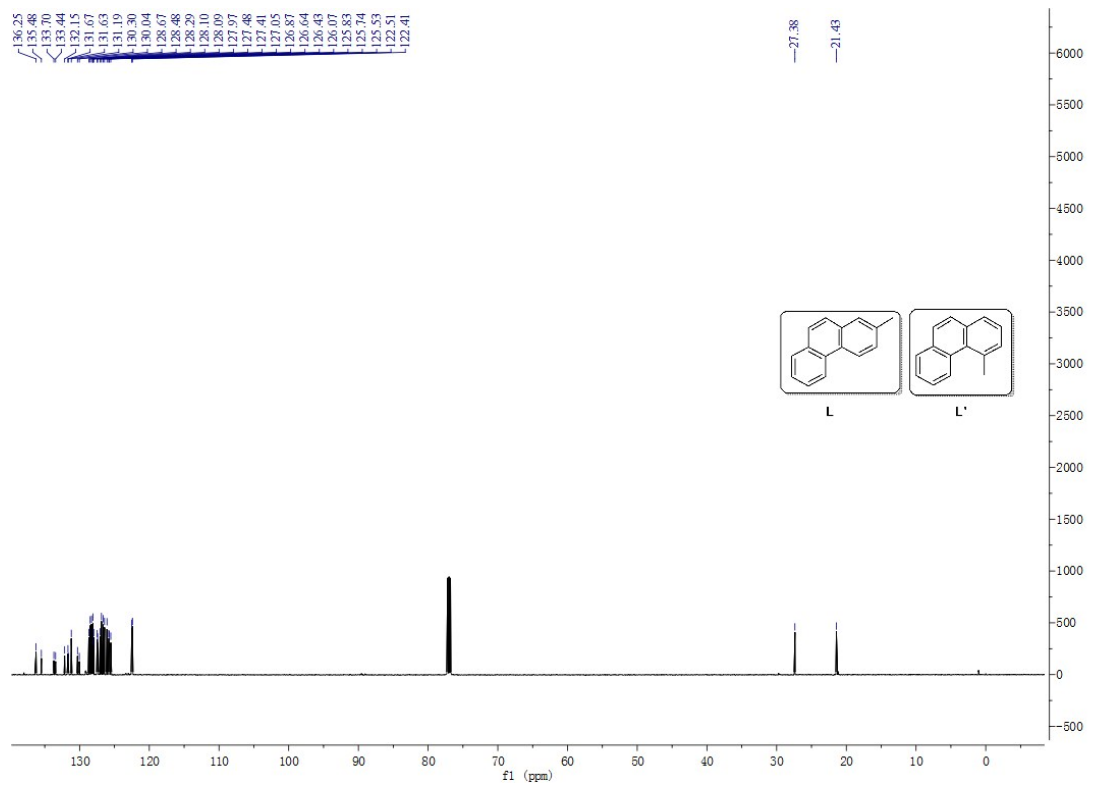

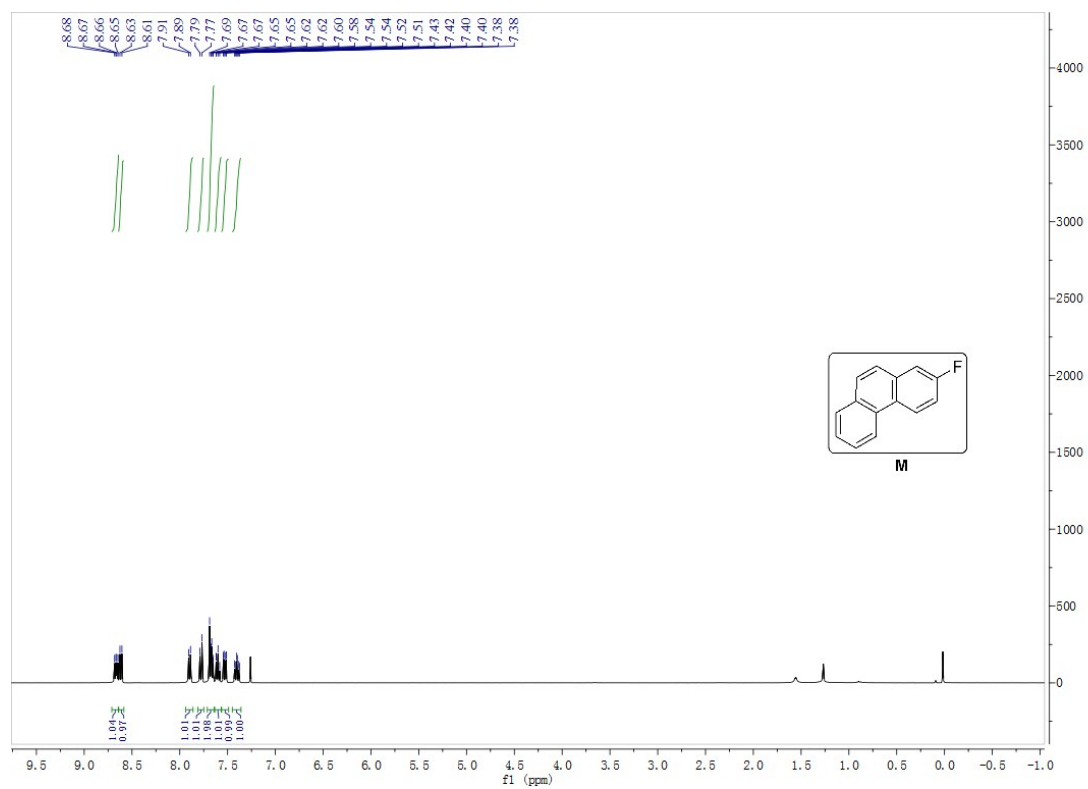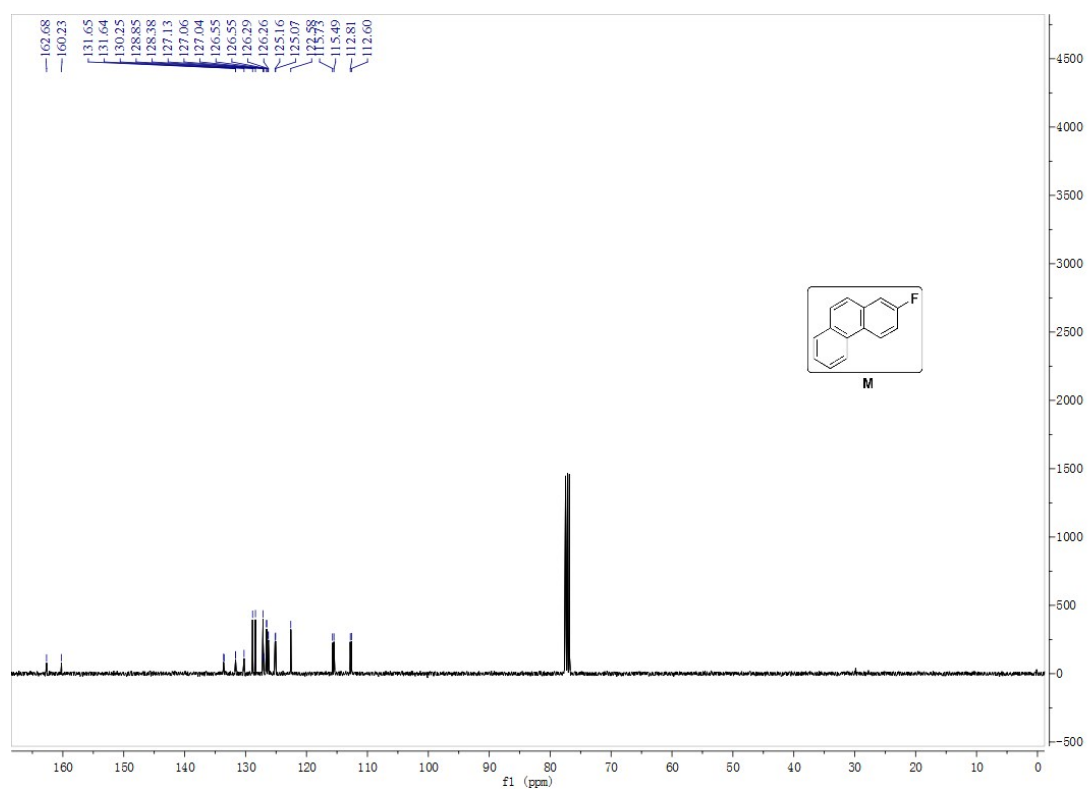

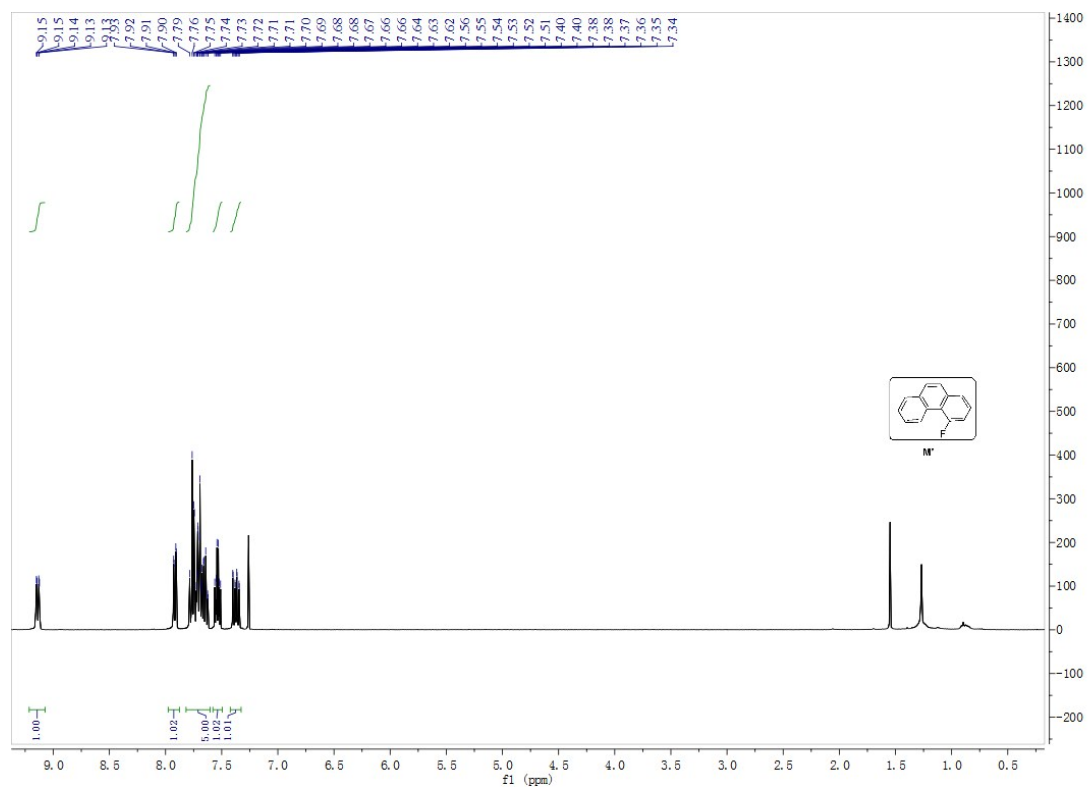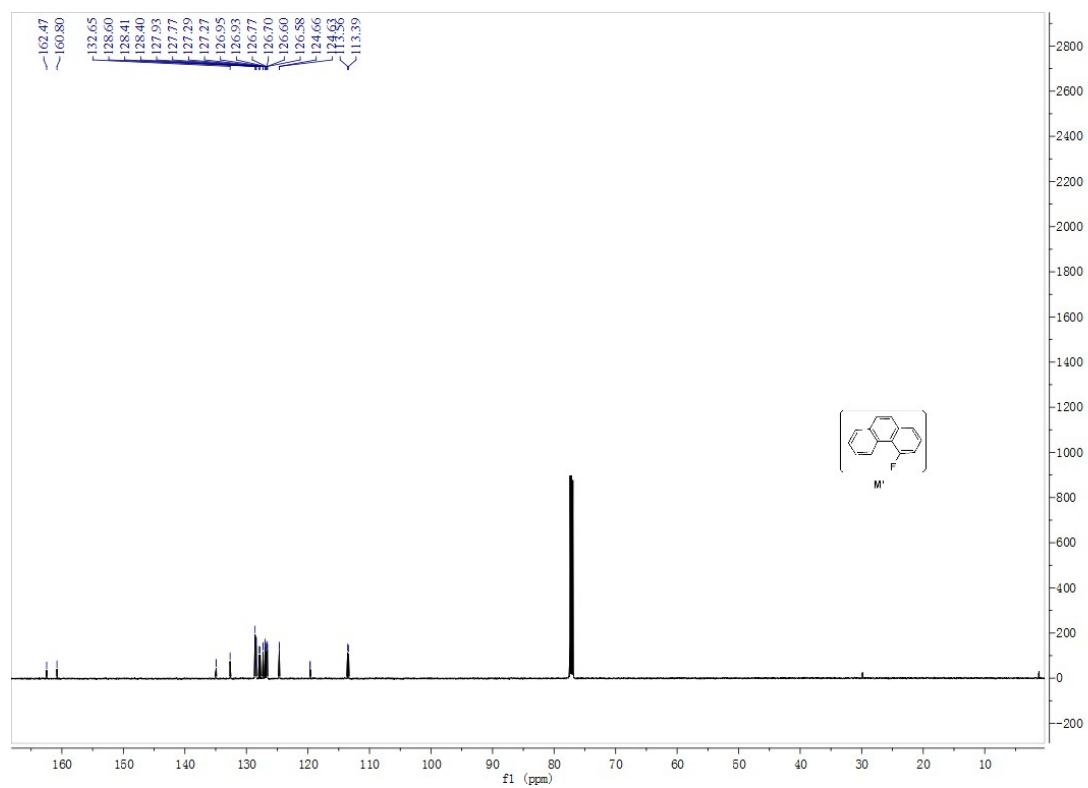

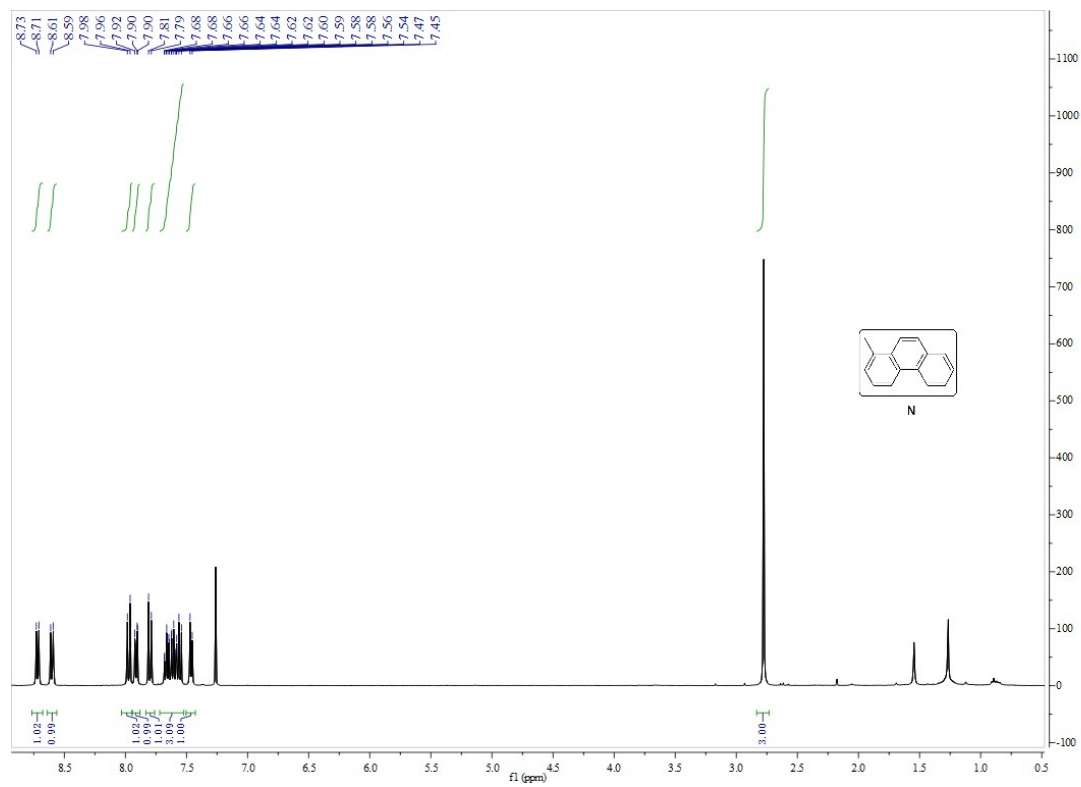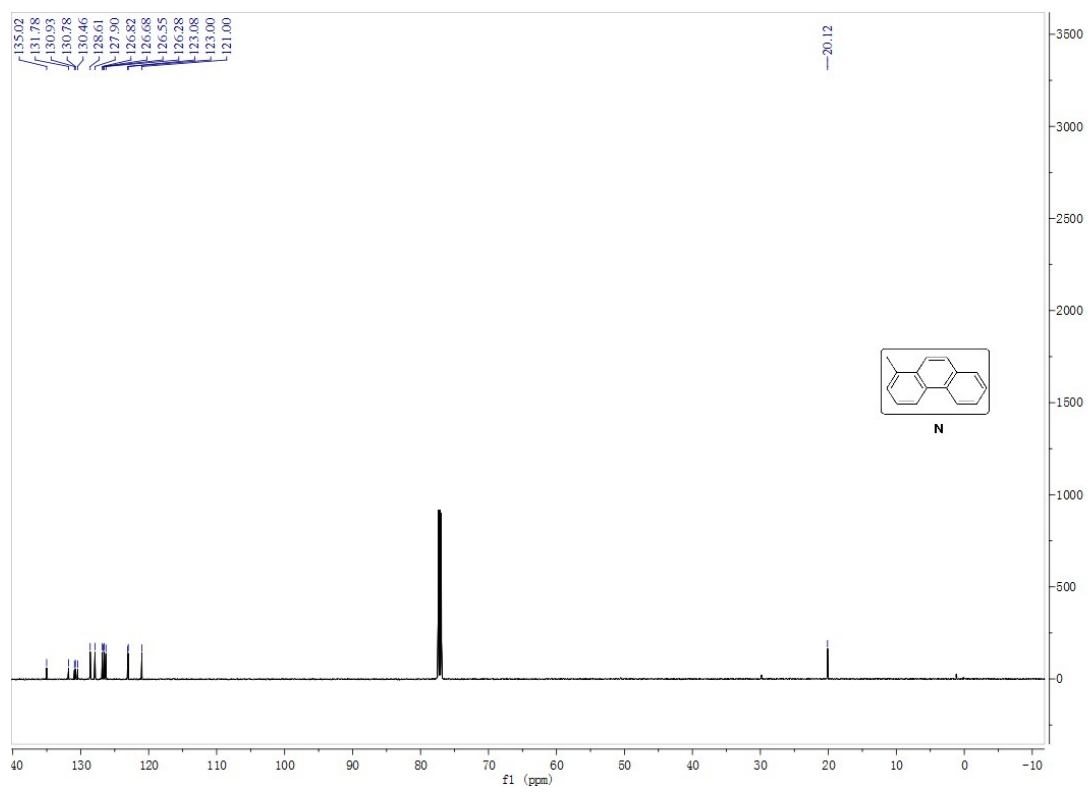

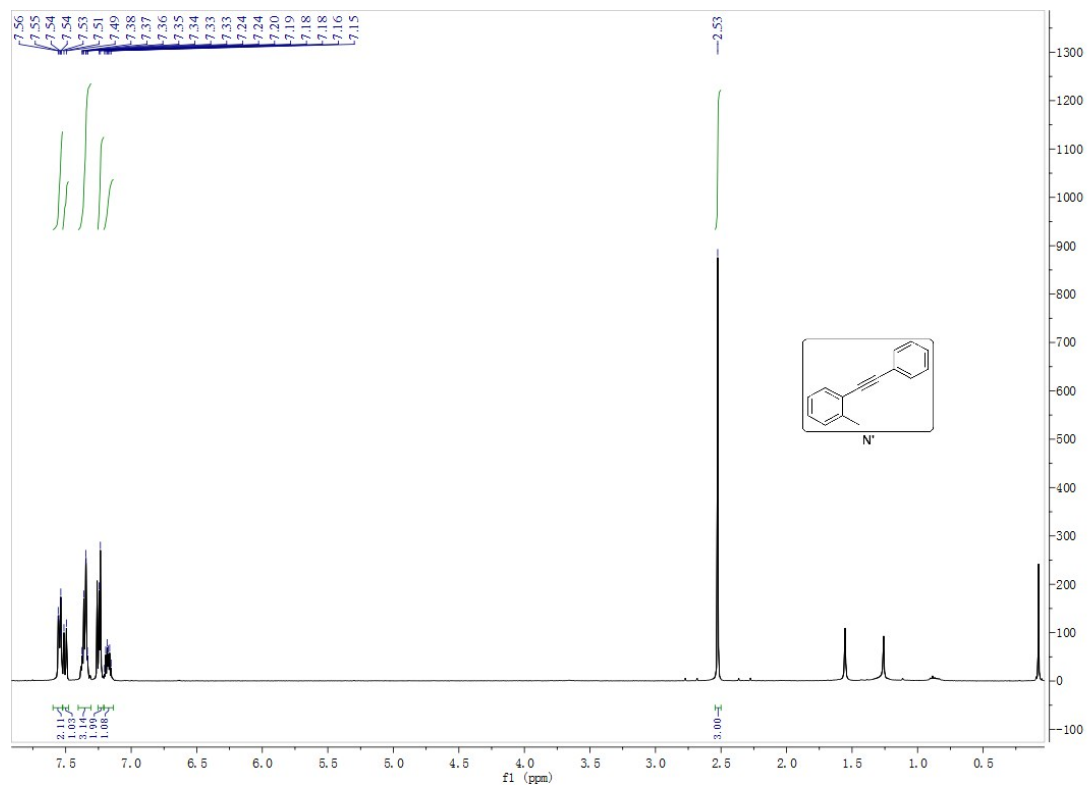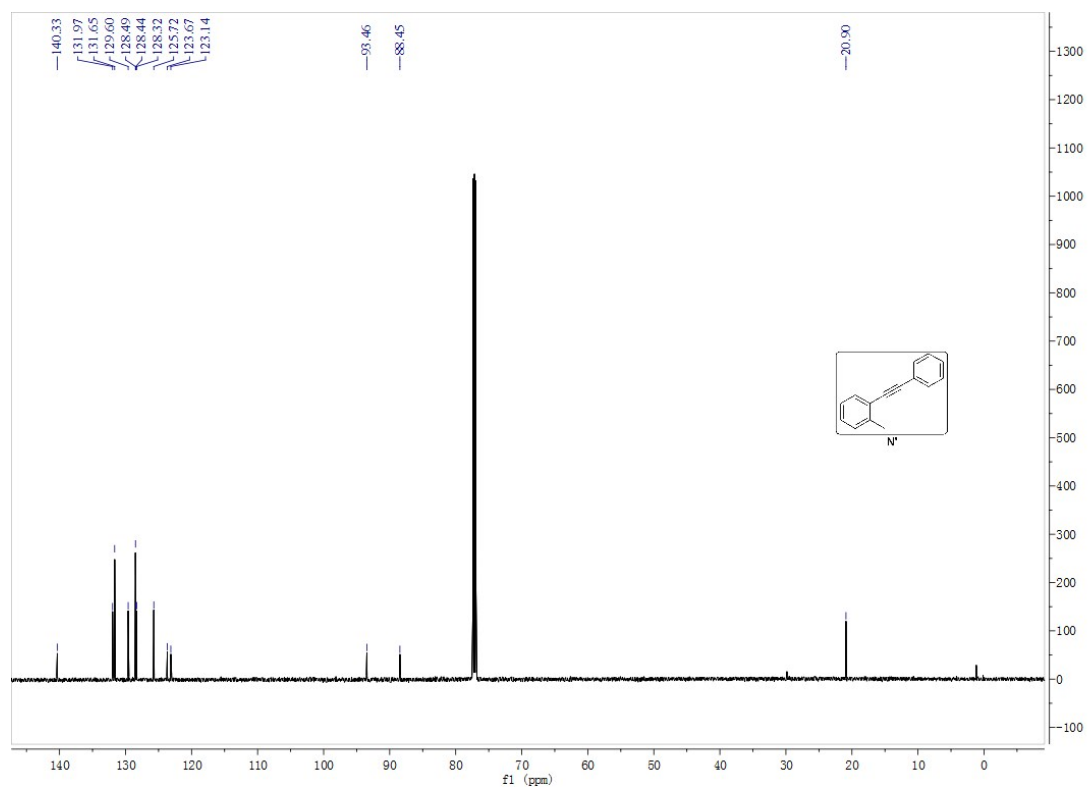

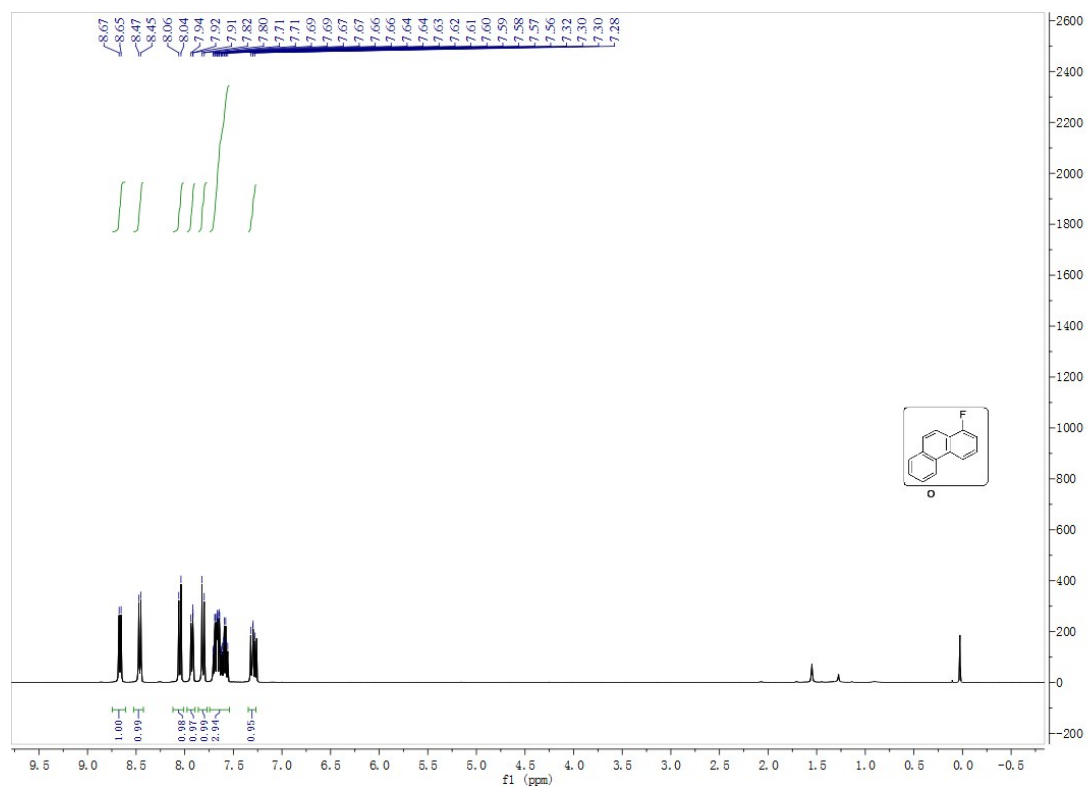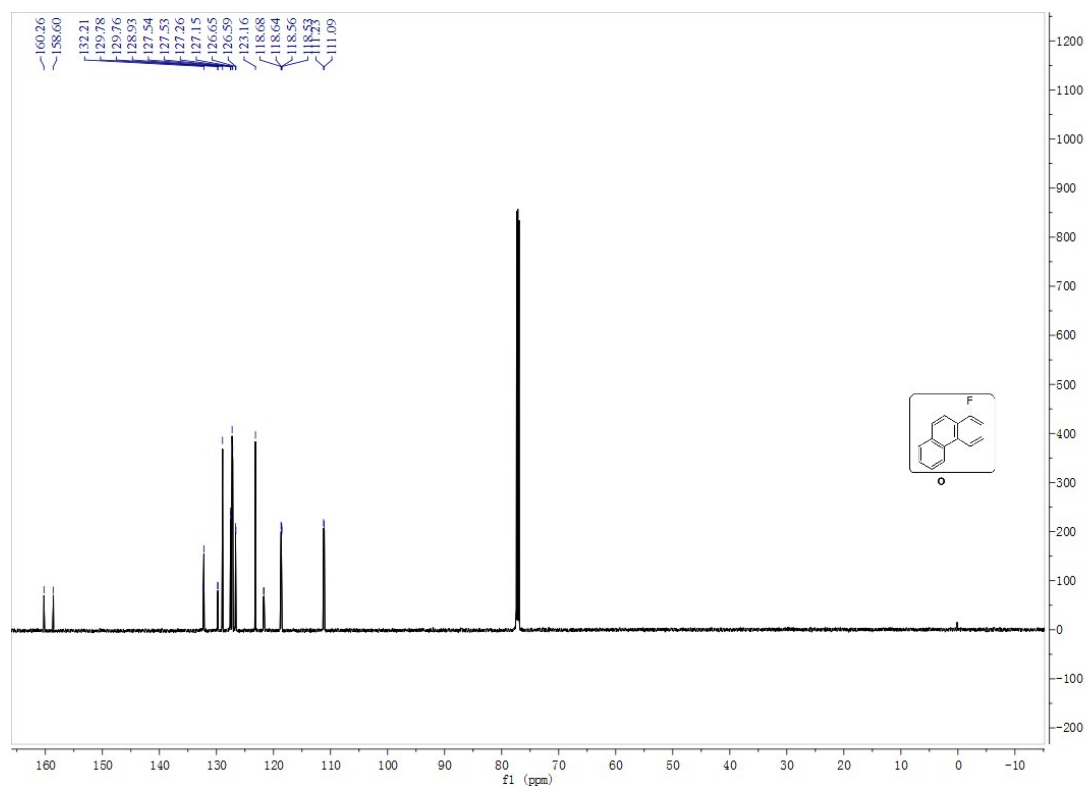

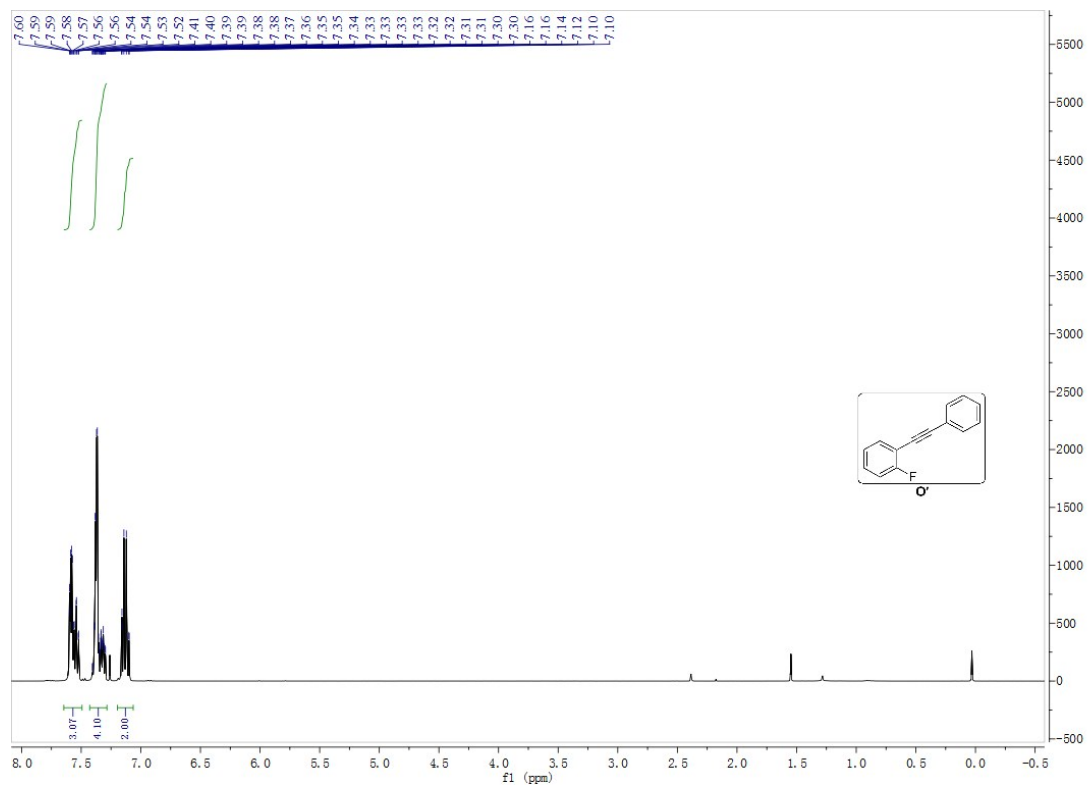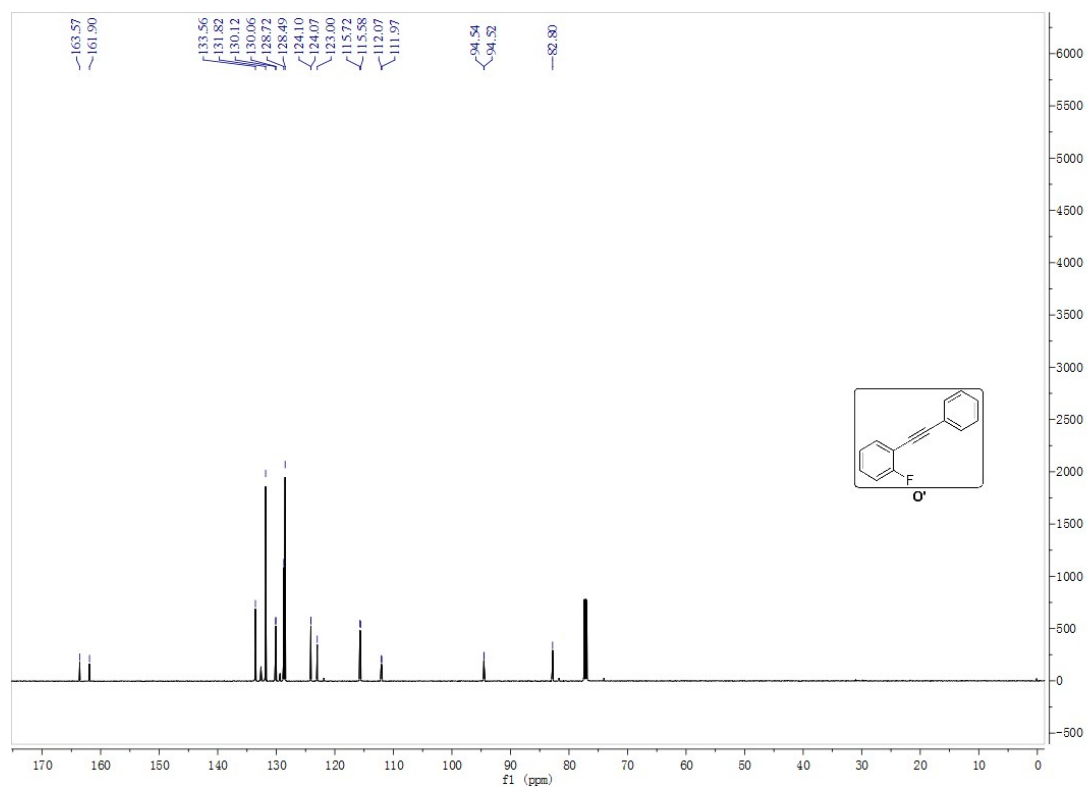

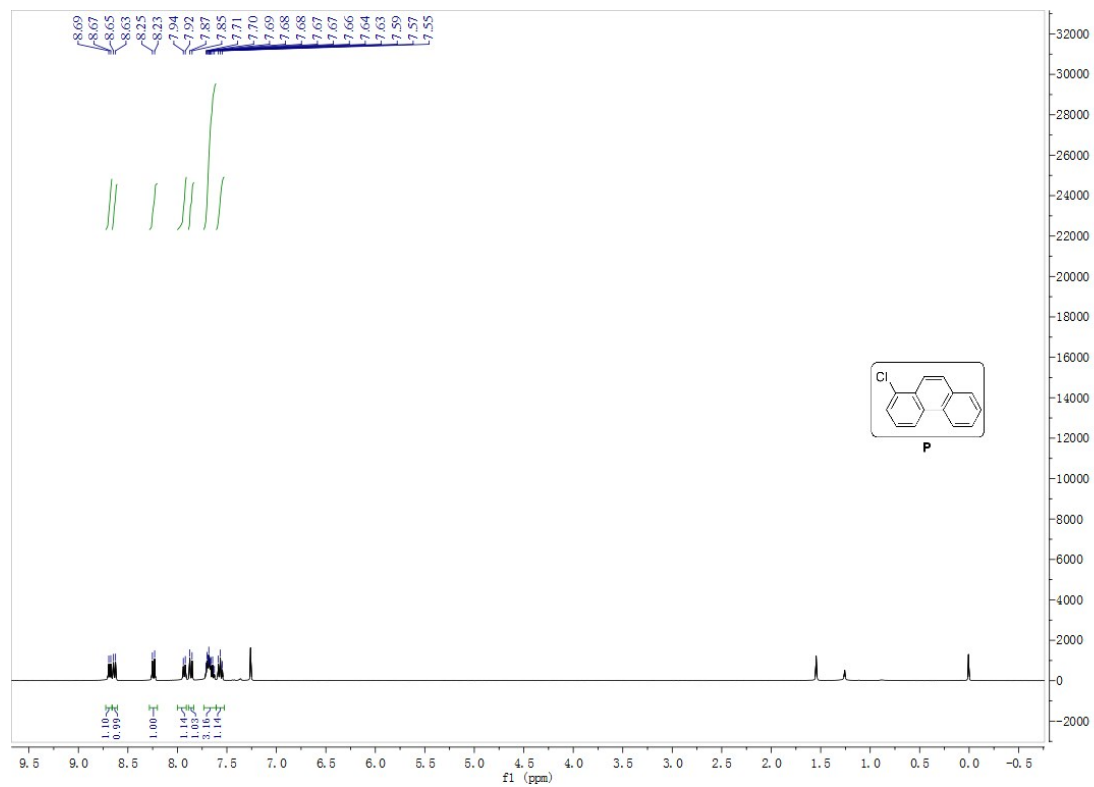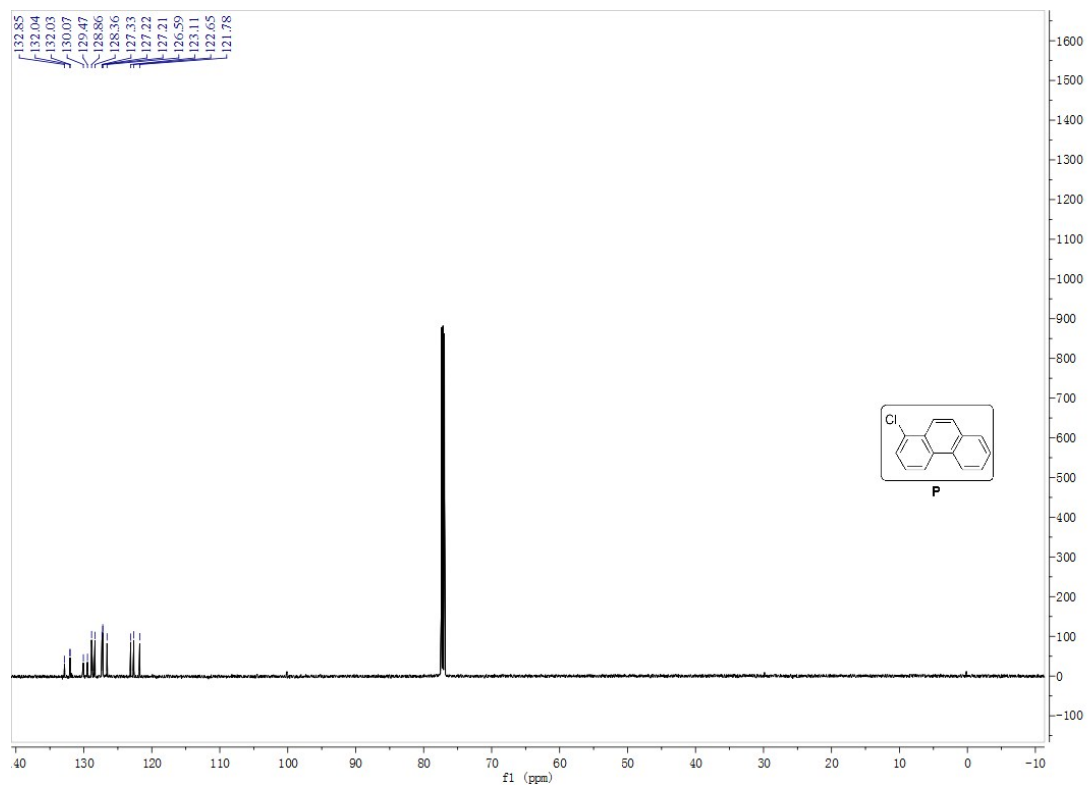



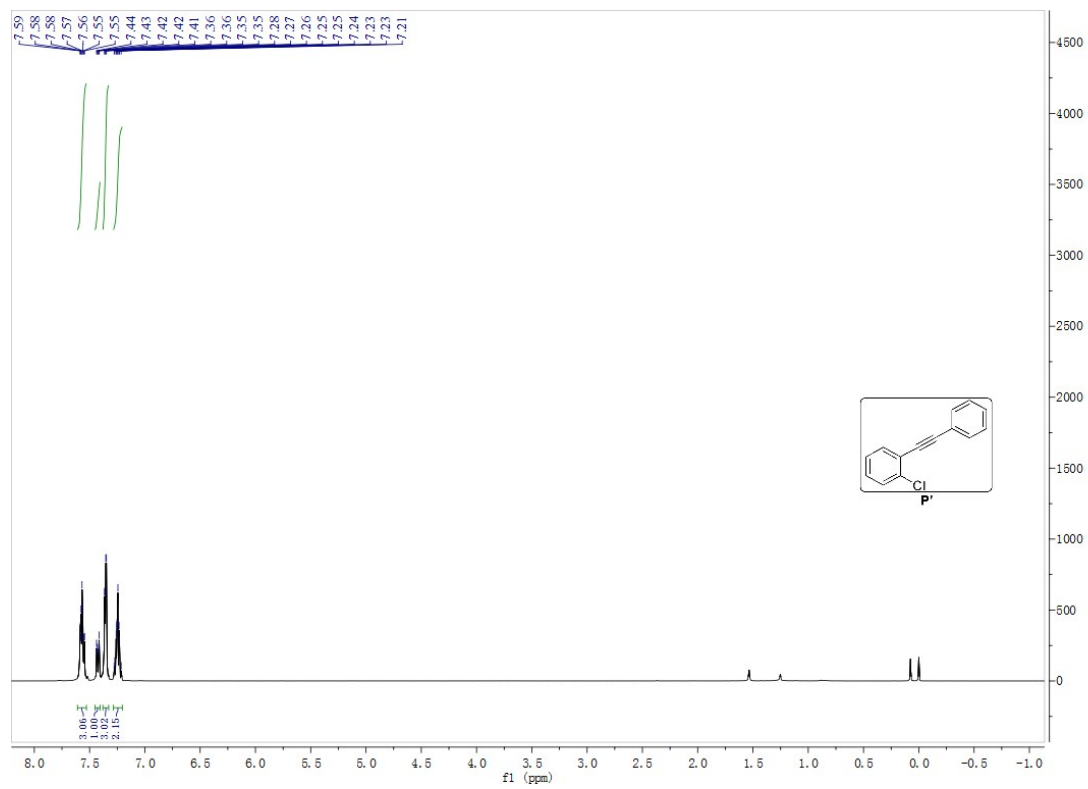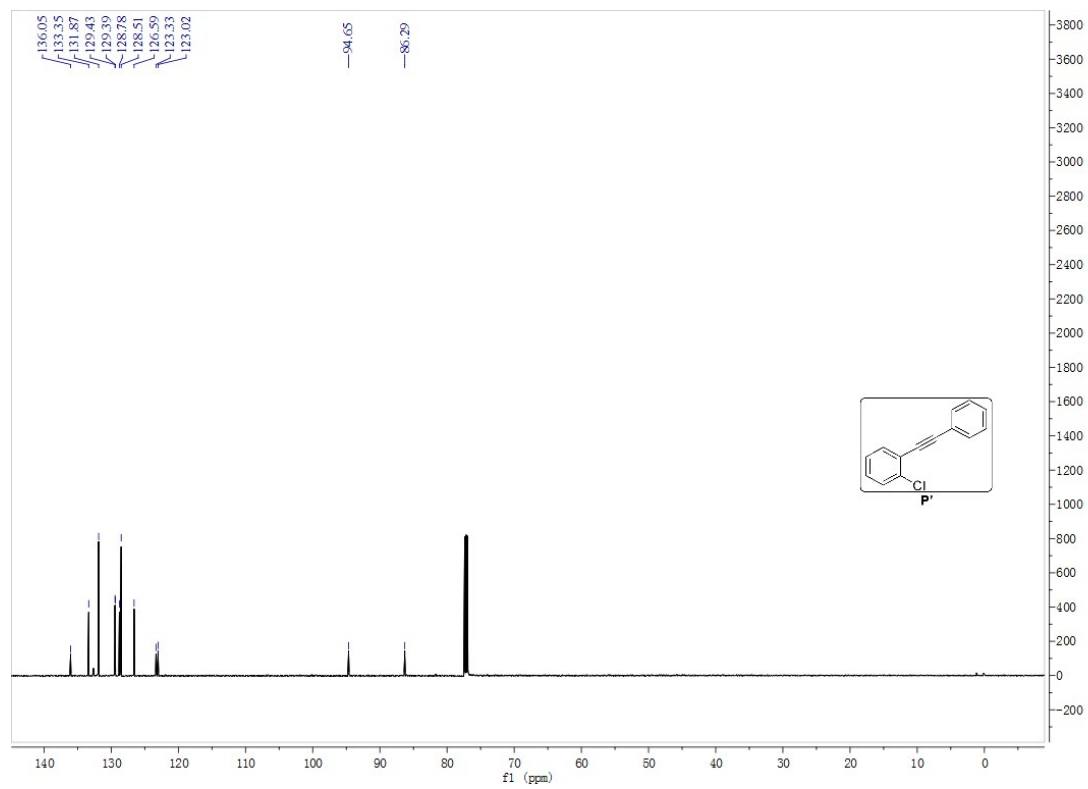

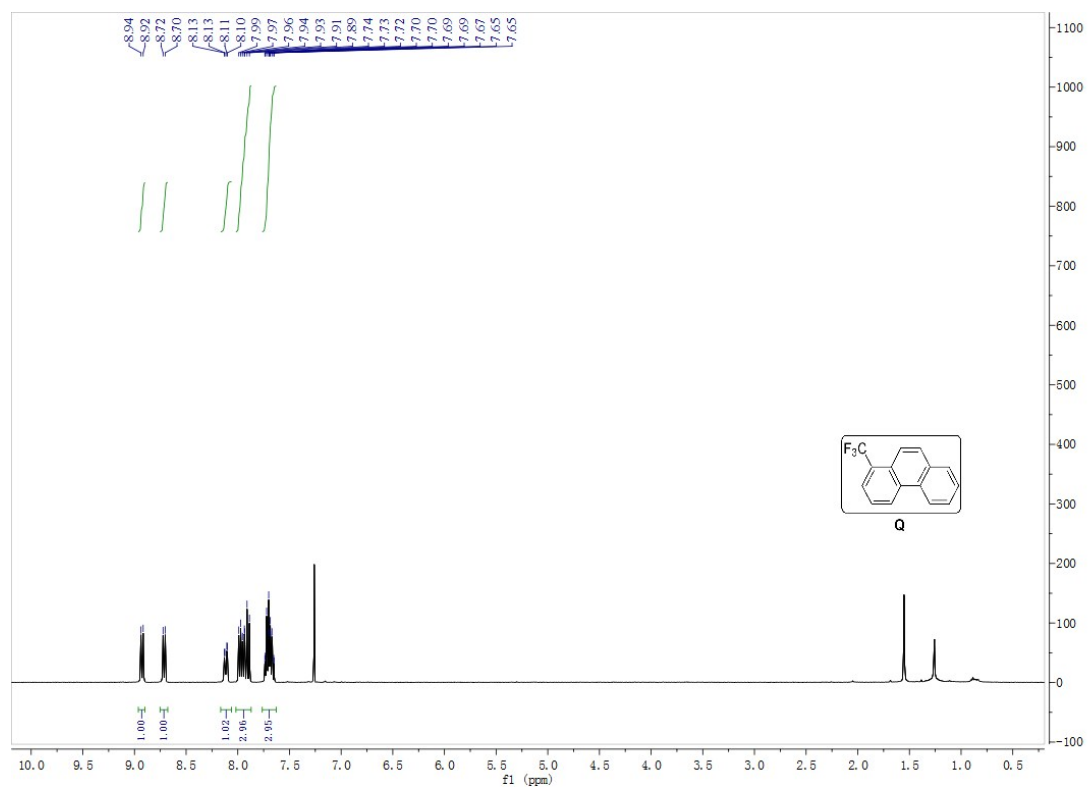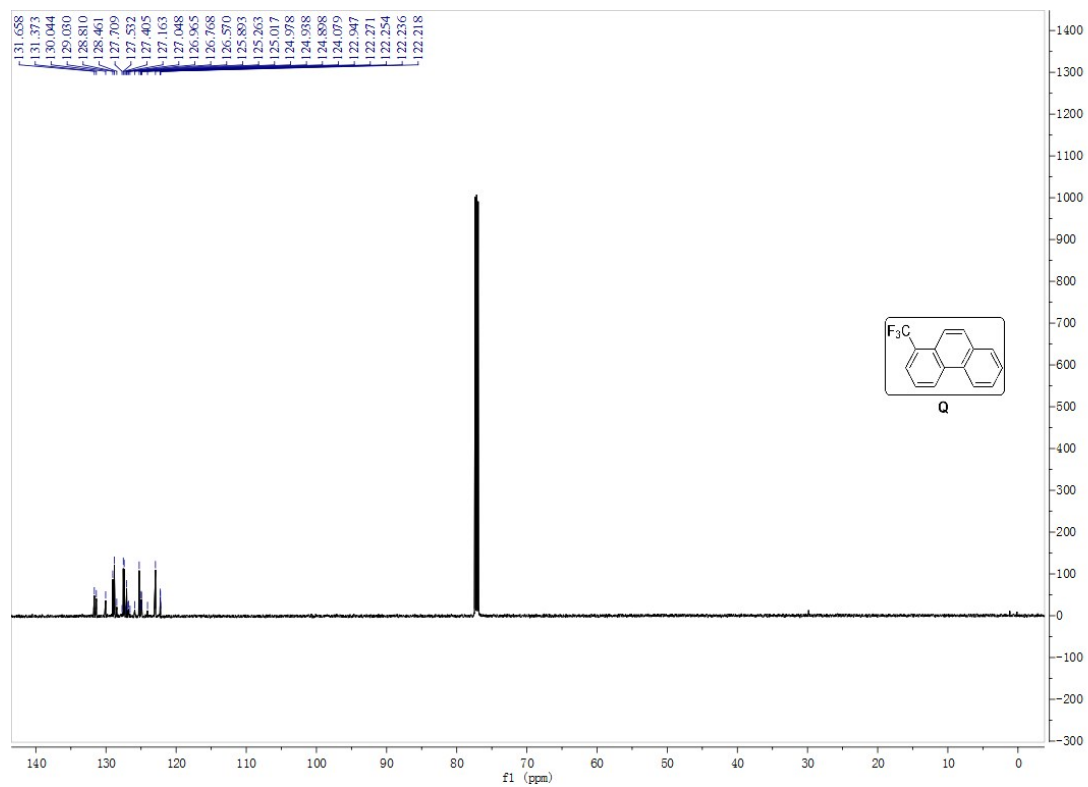

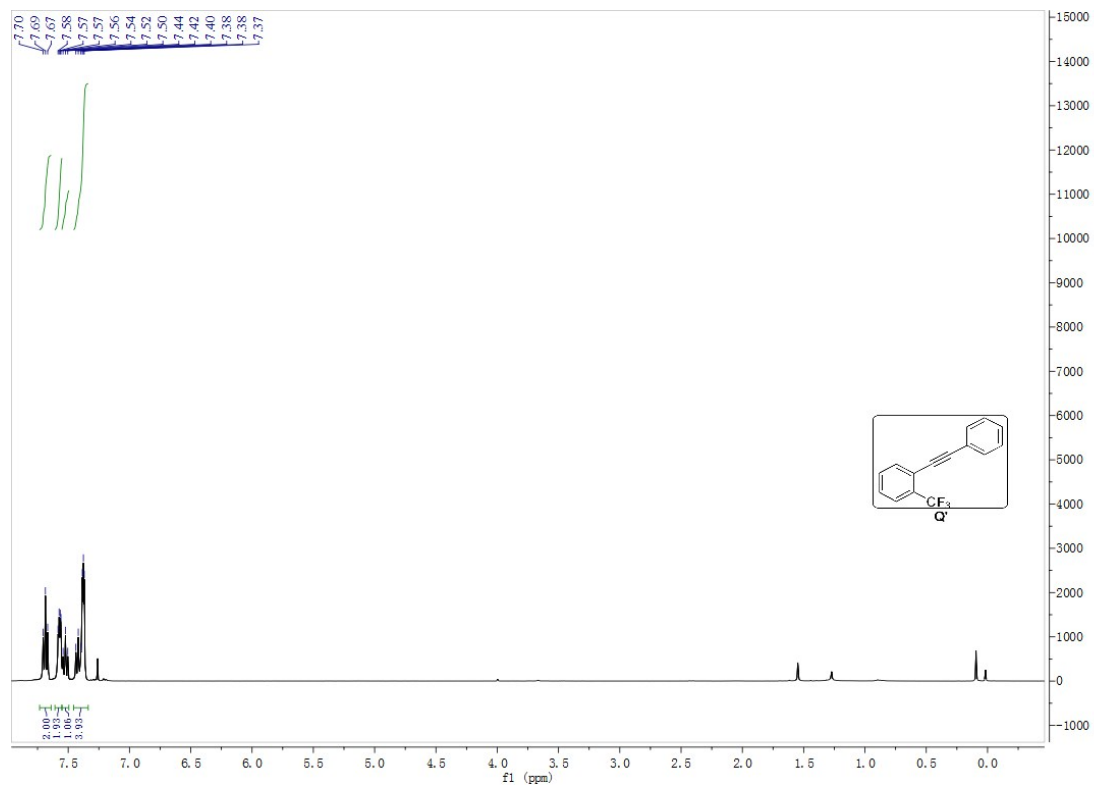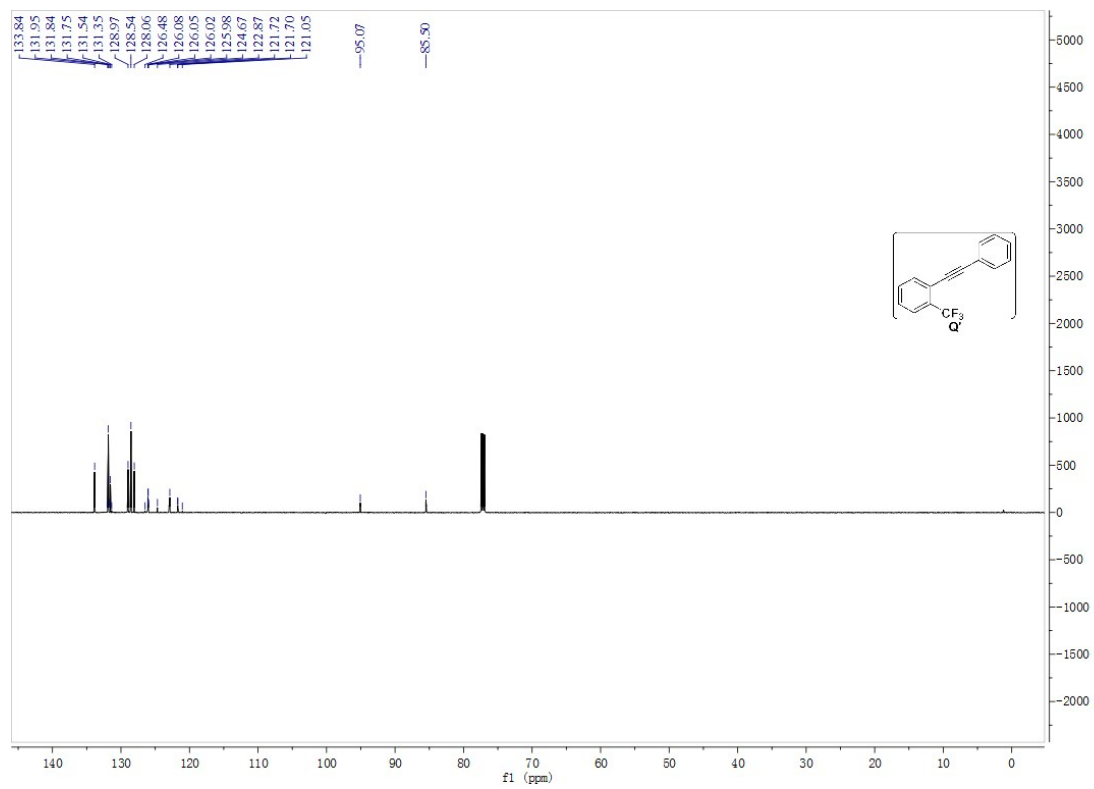

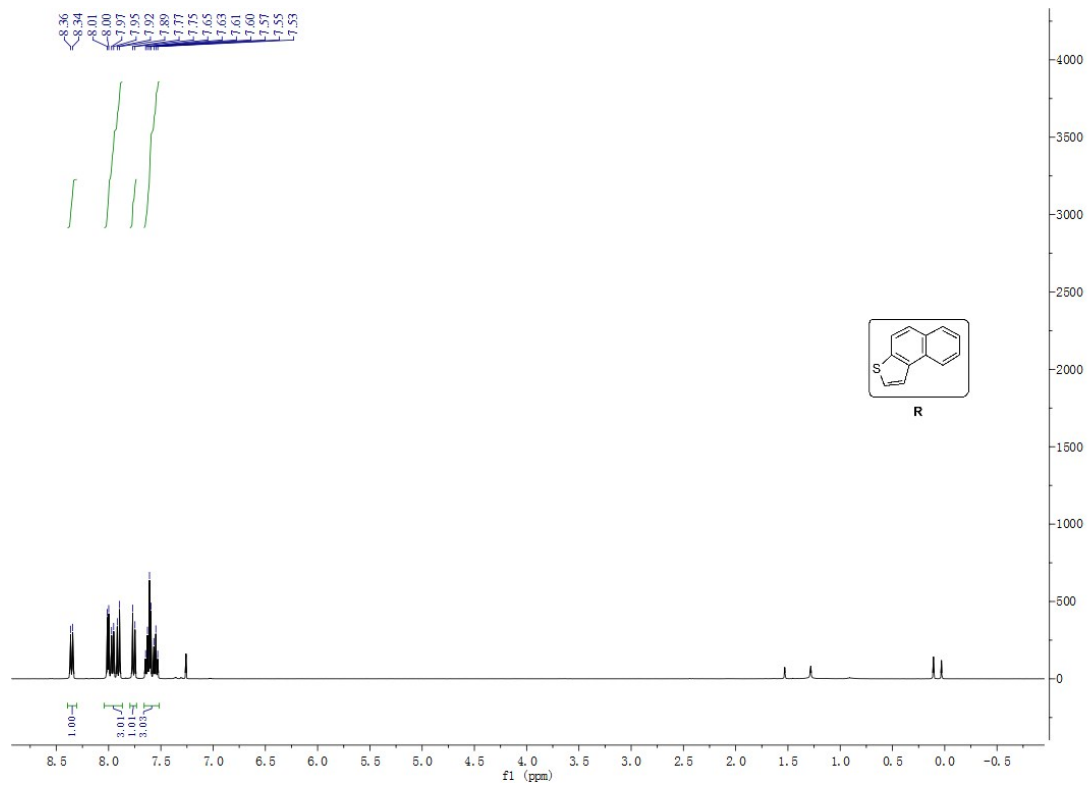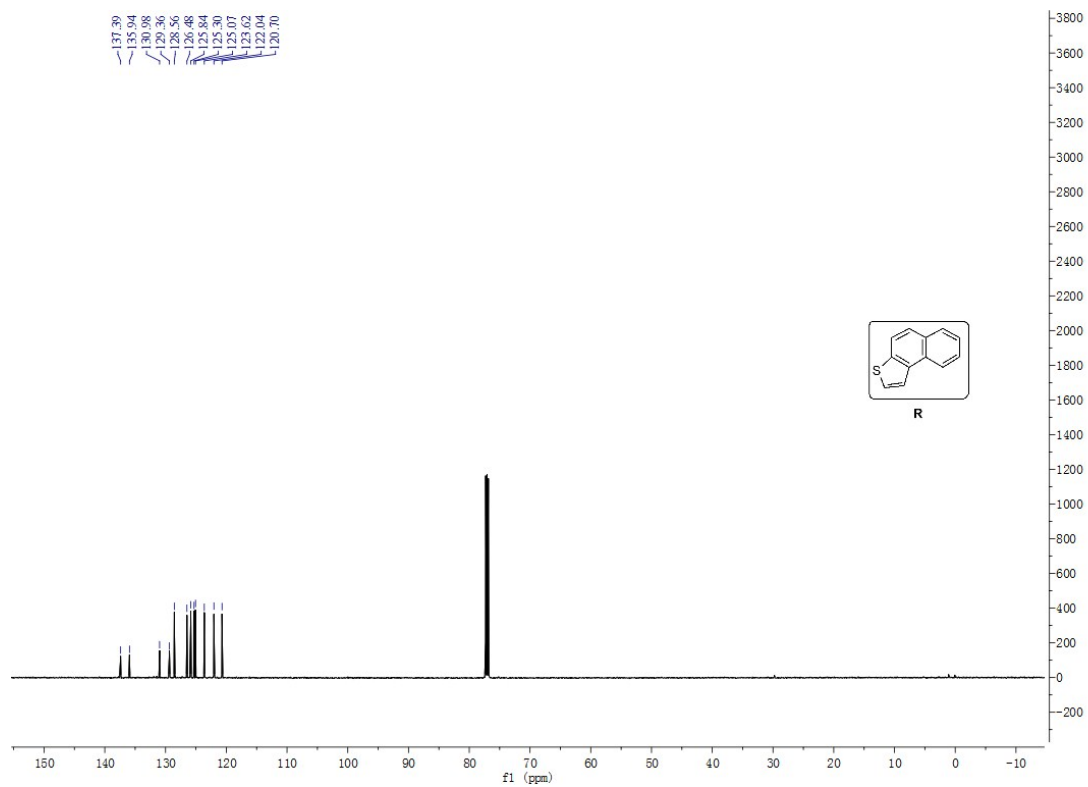

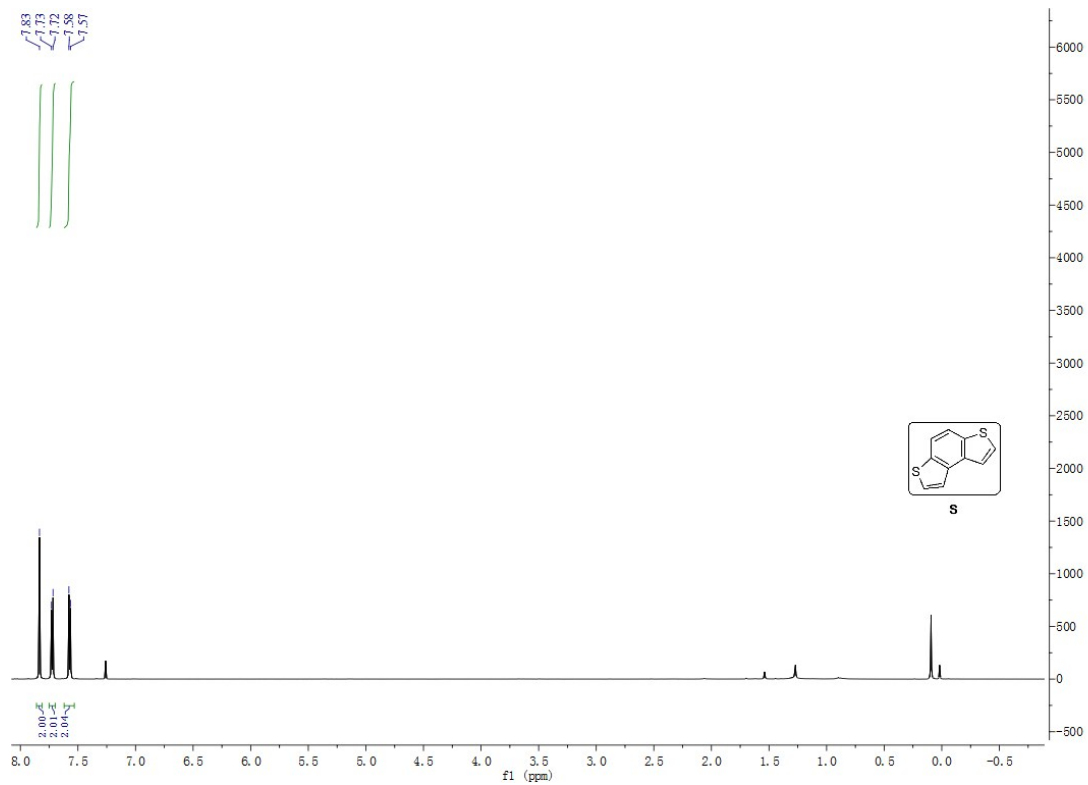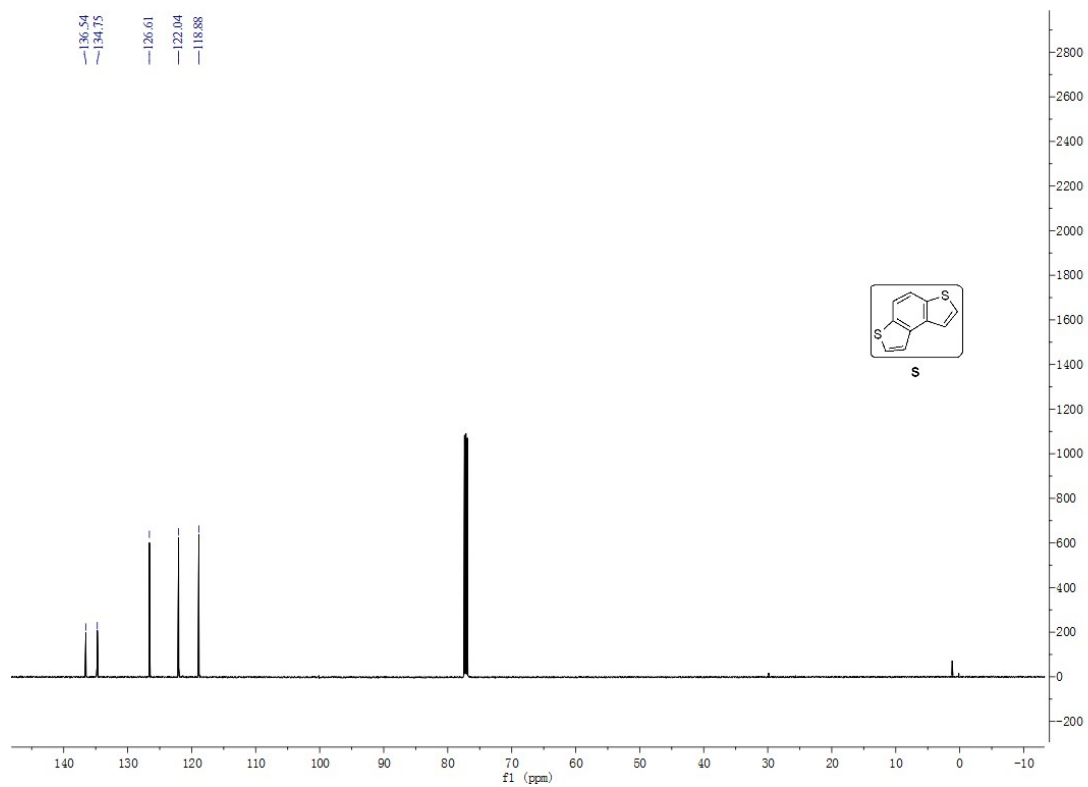

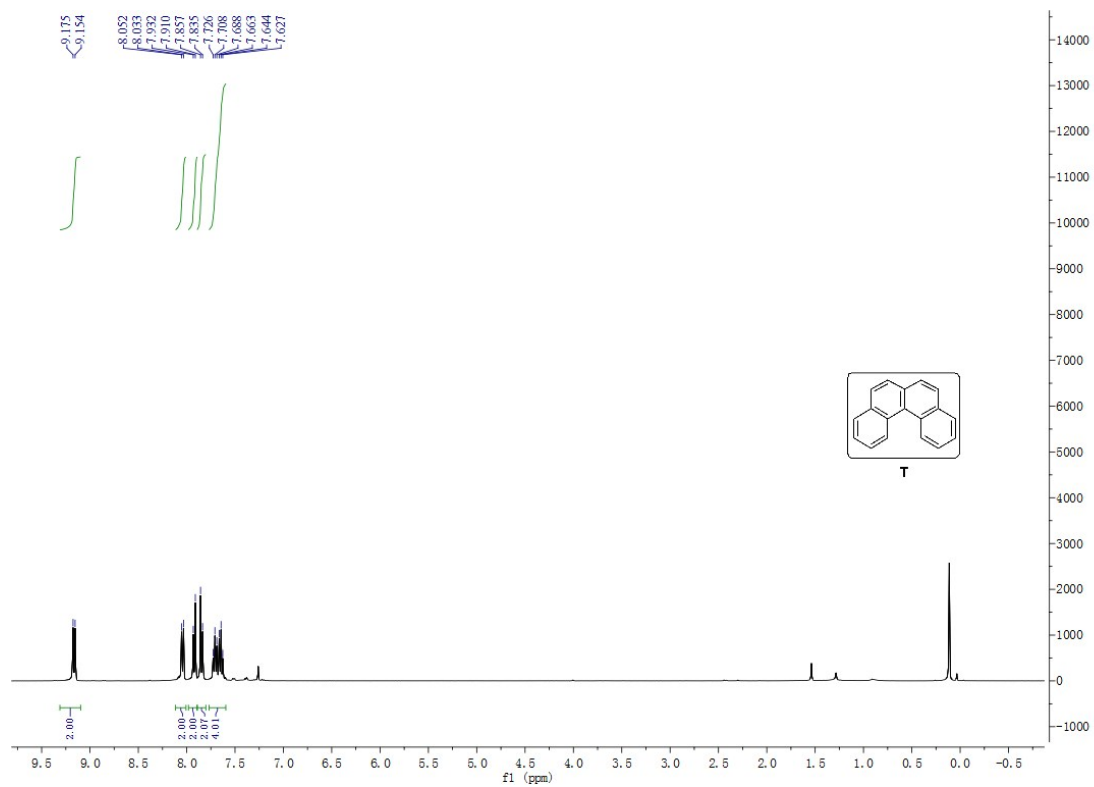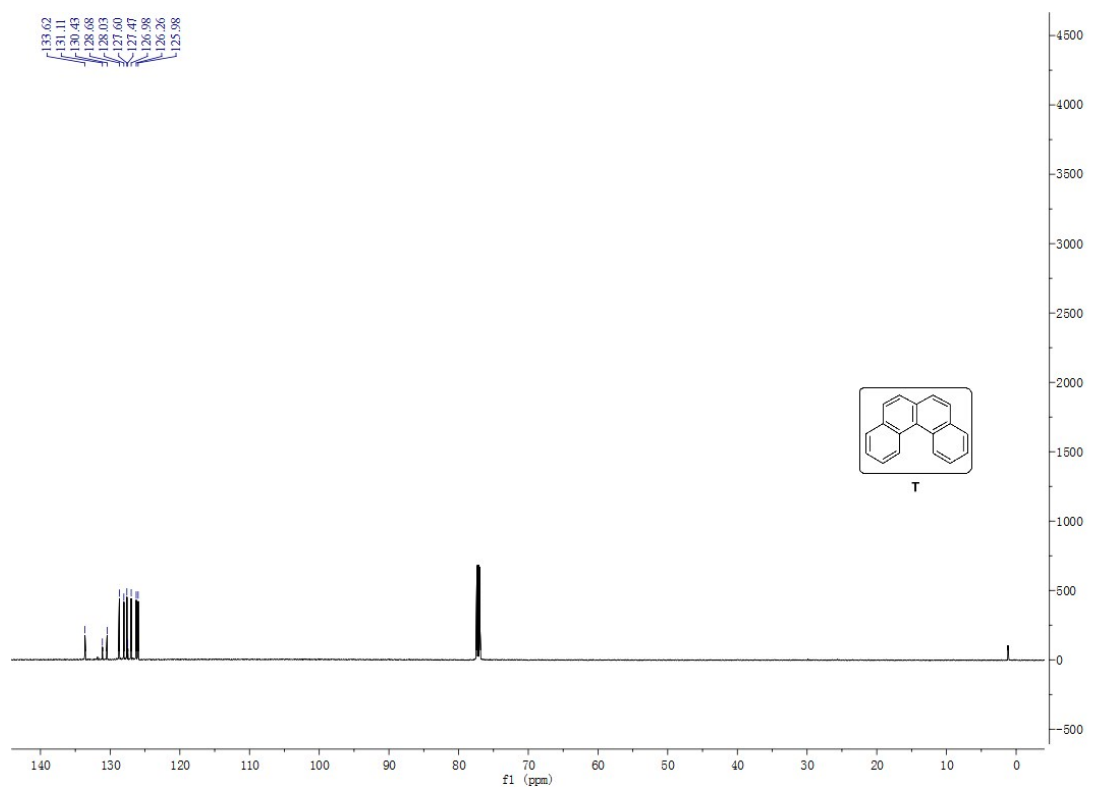

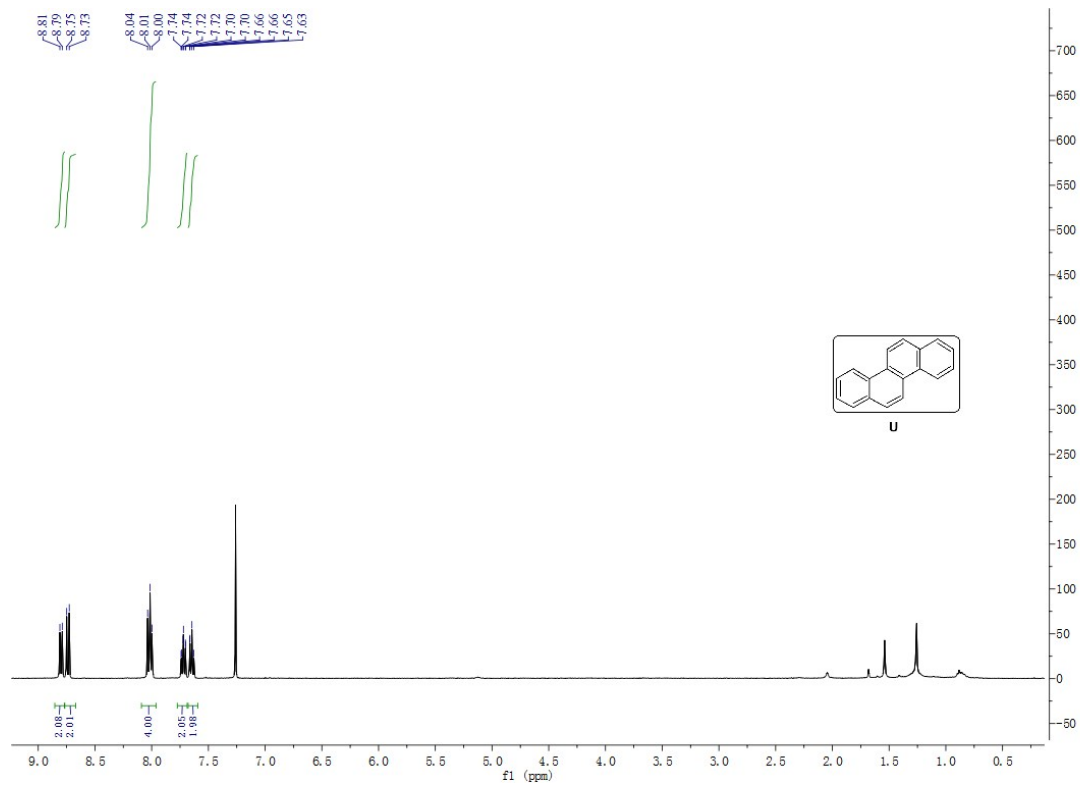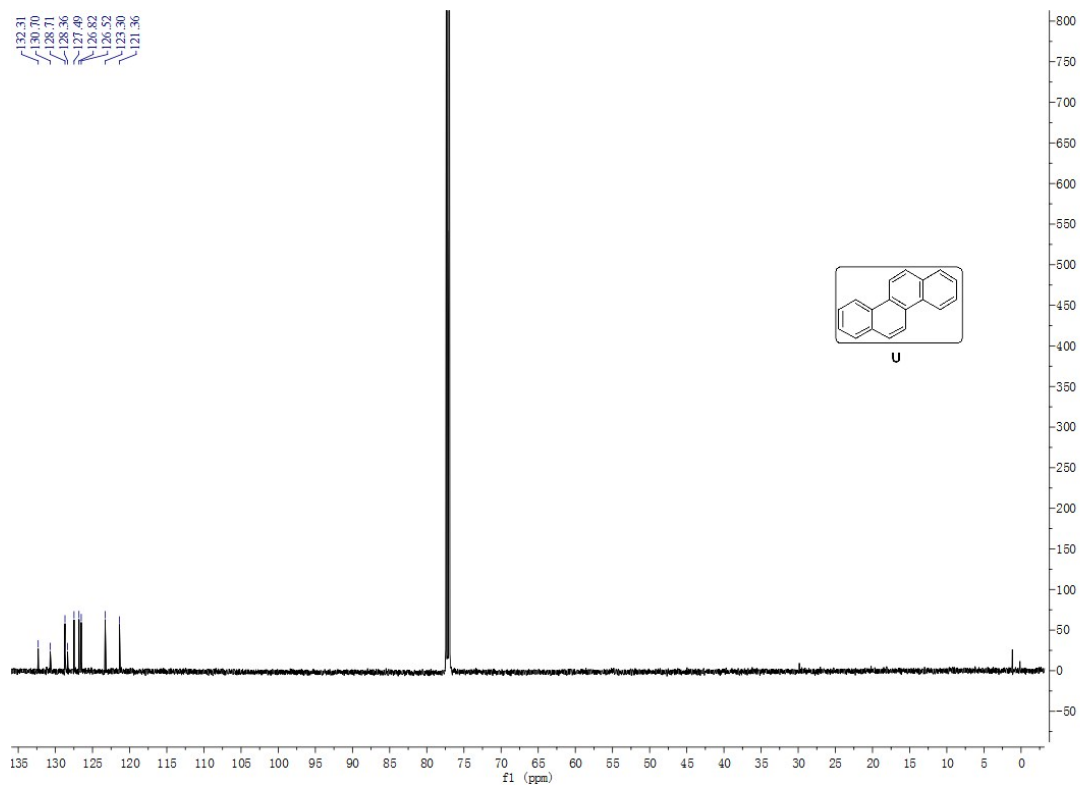

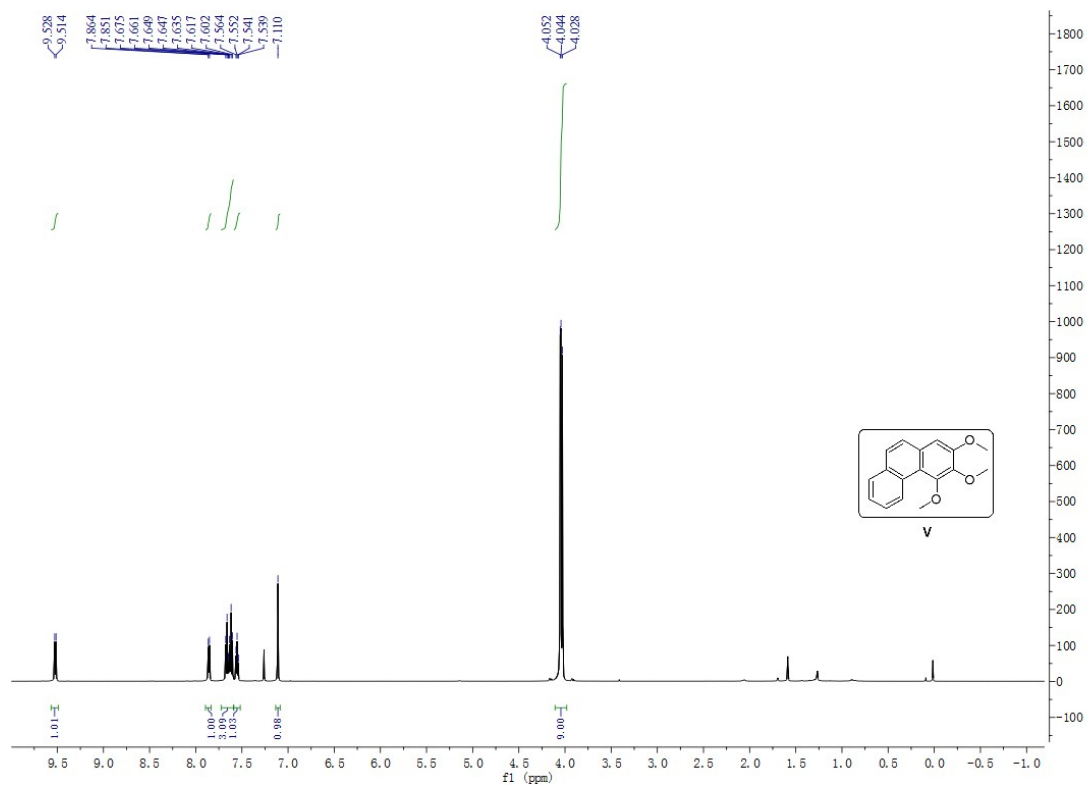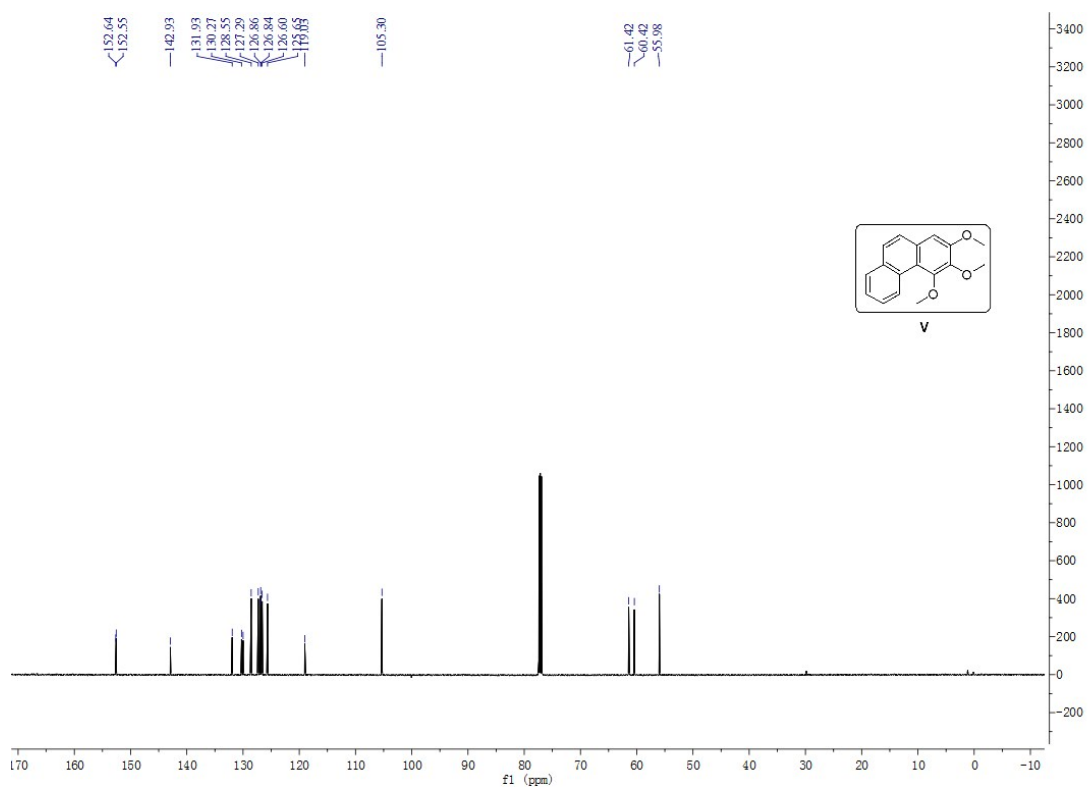



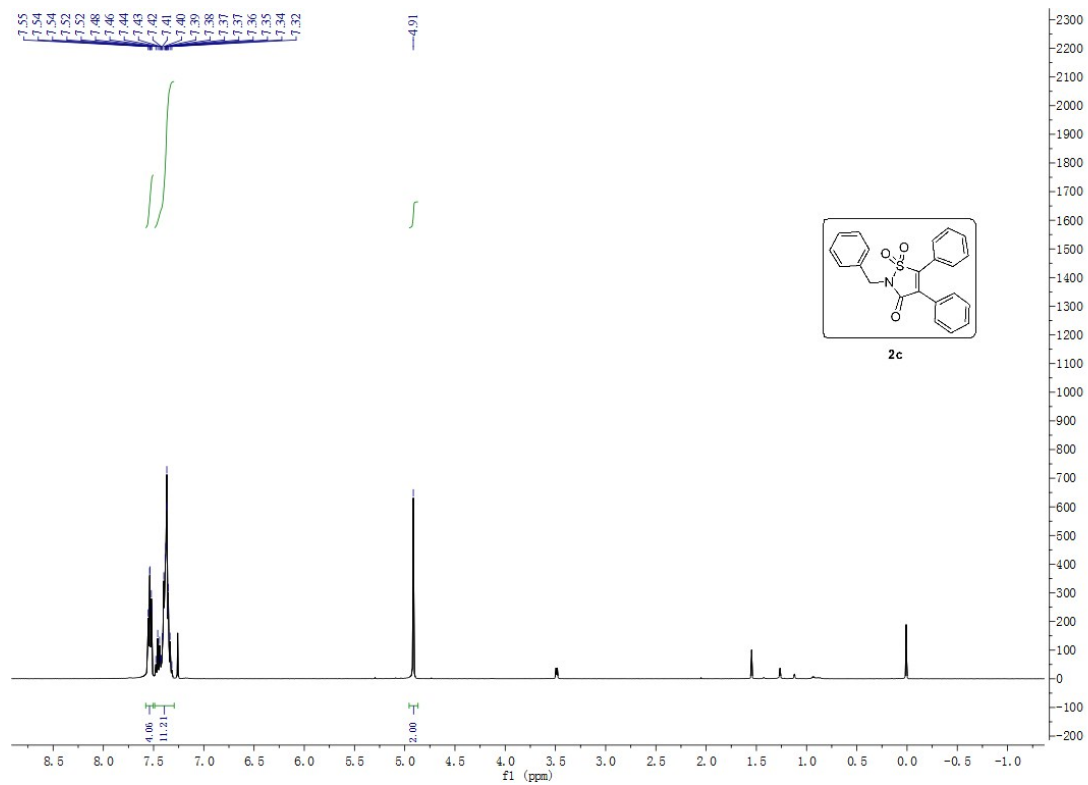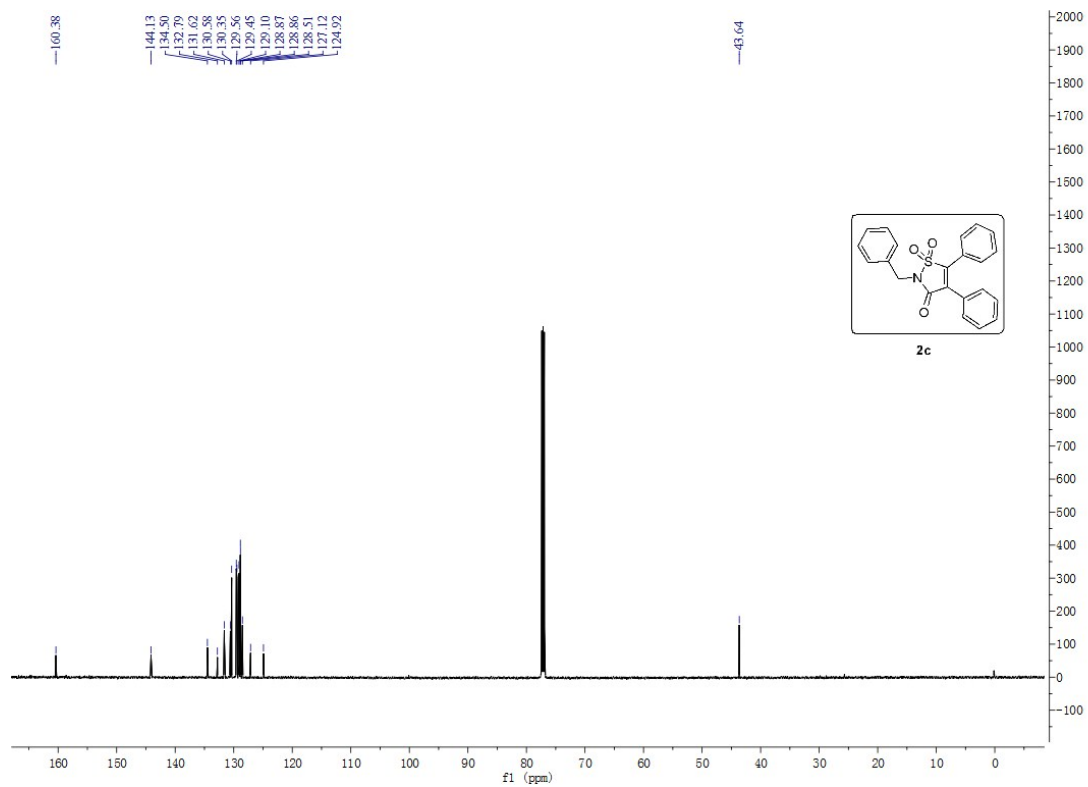

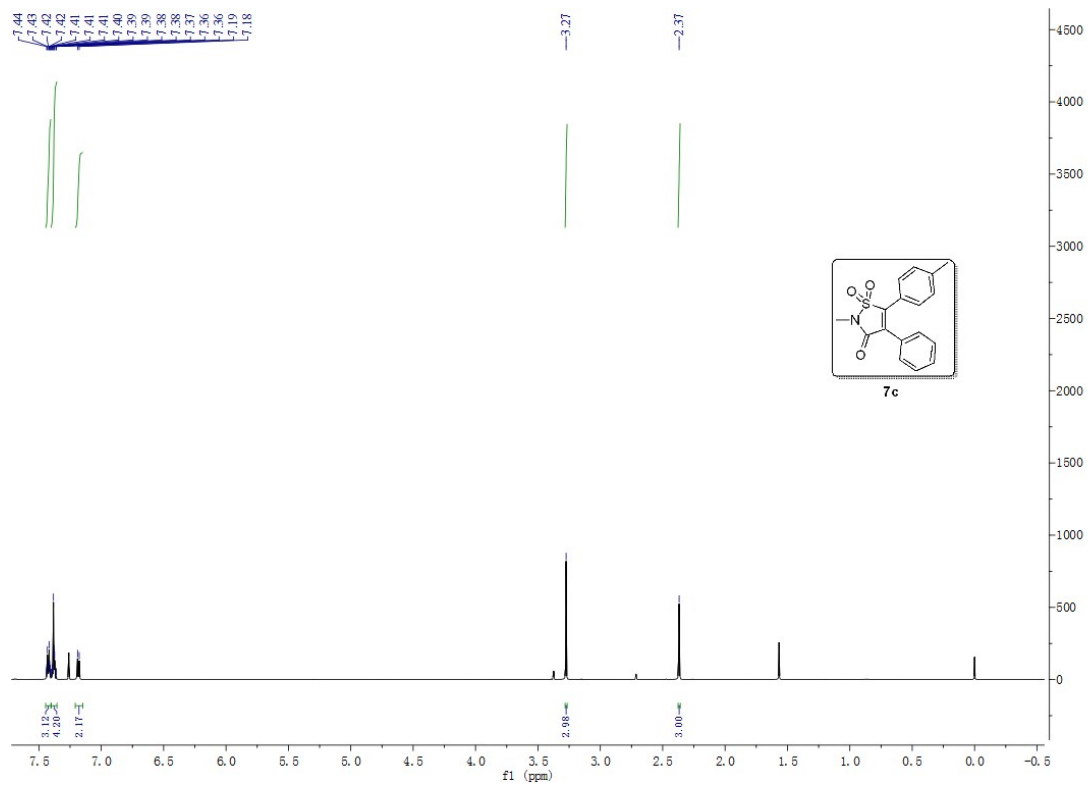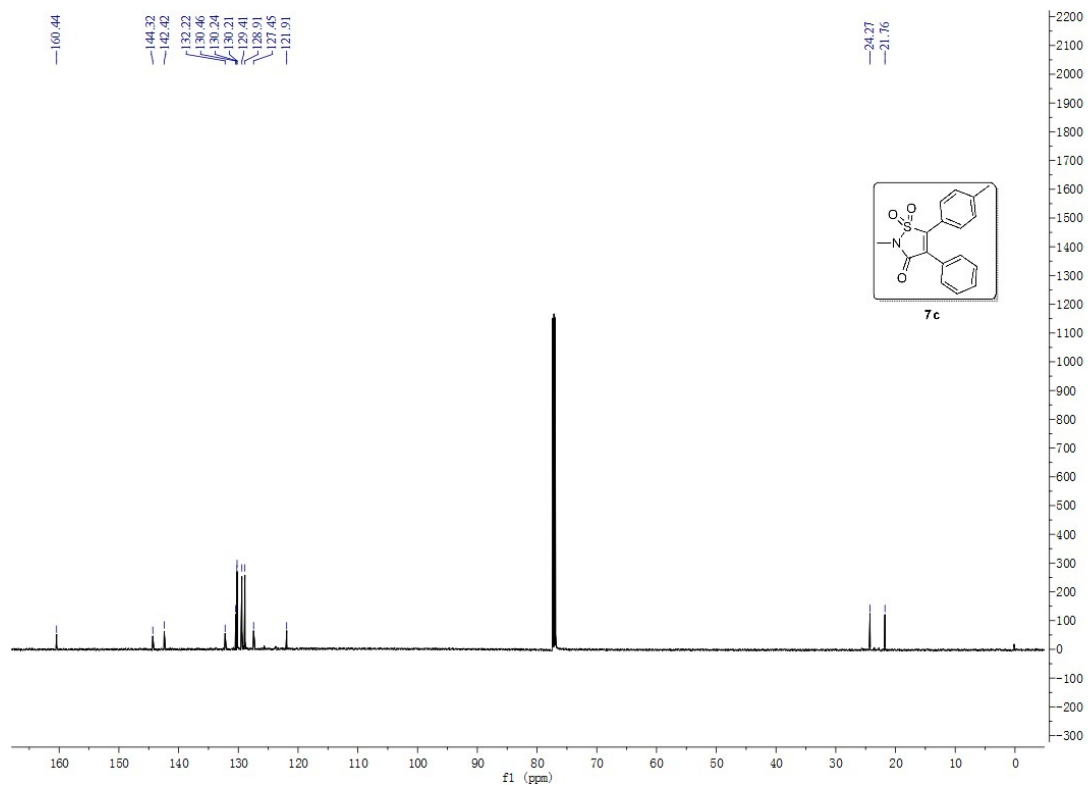

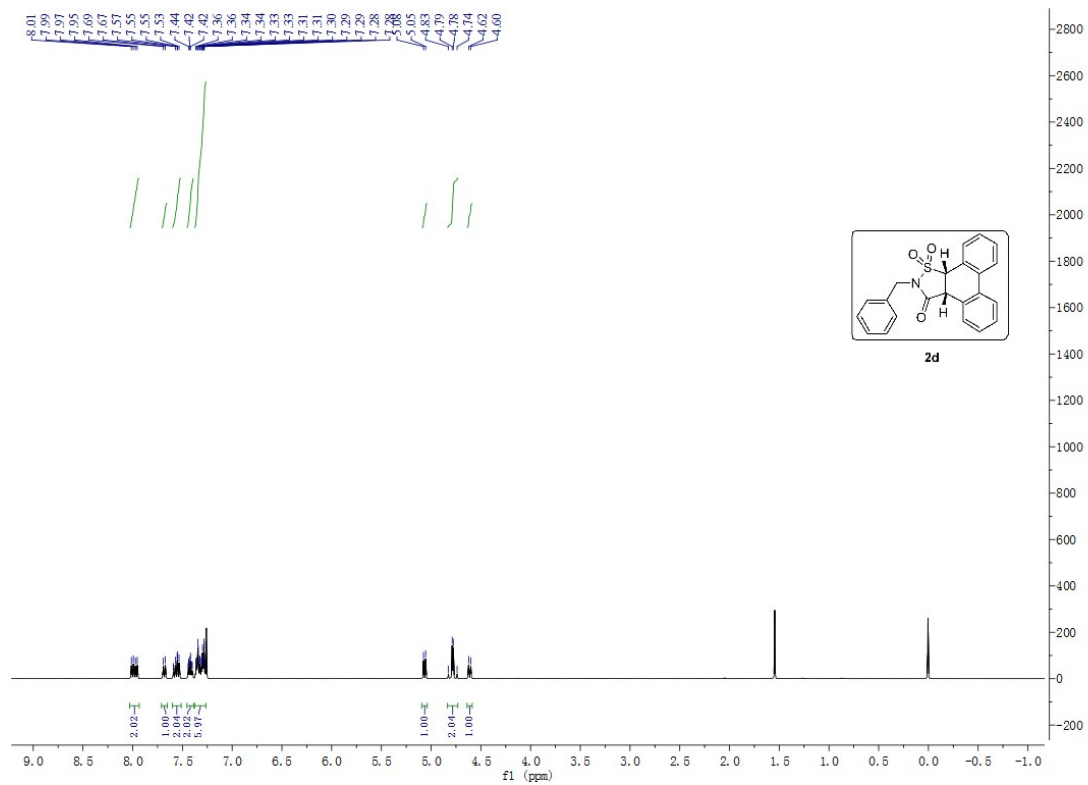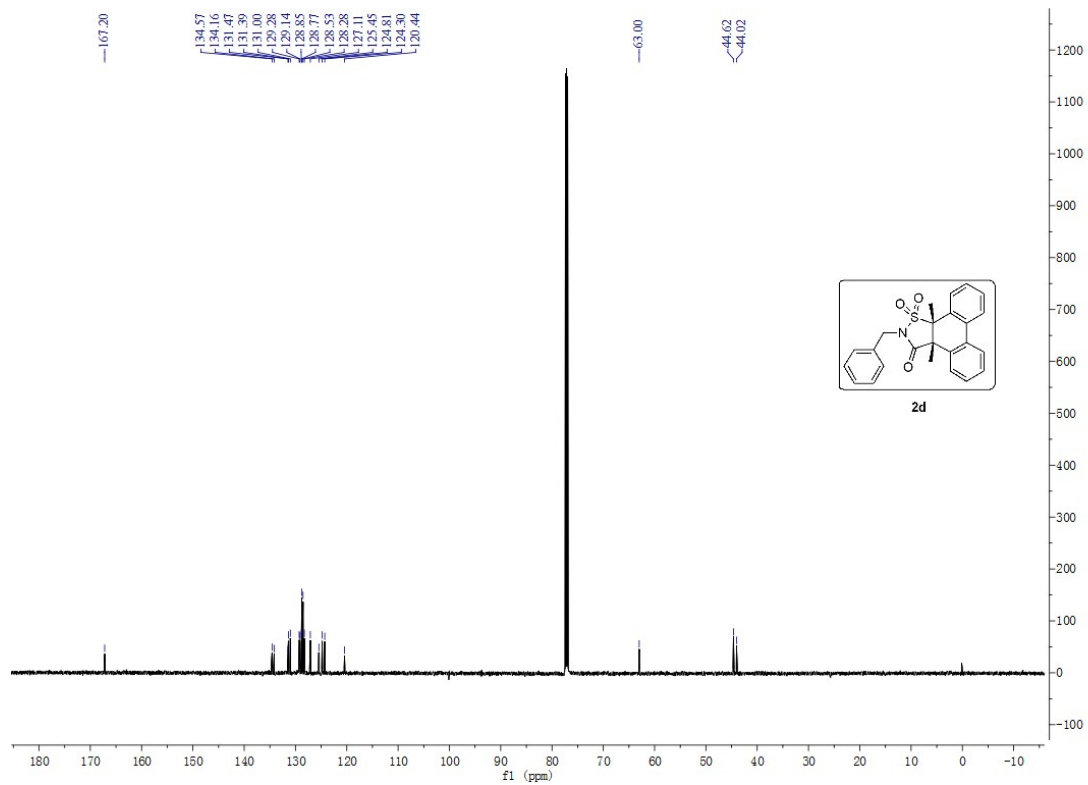

The NOE spectrum of **2d**.

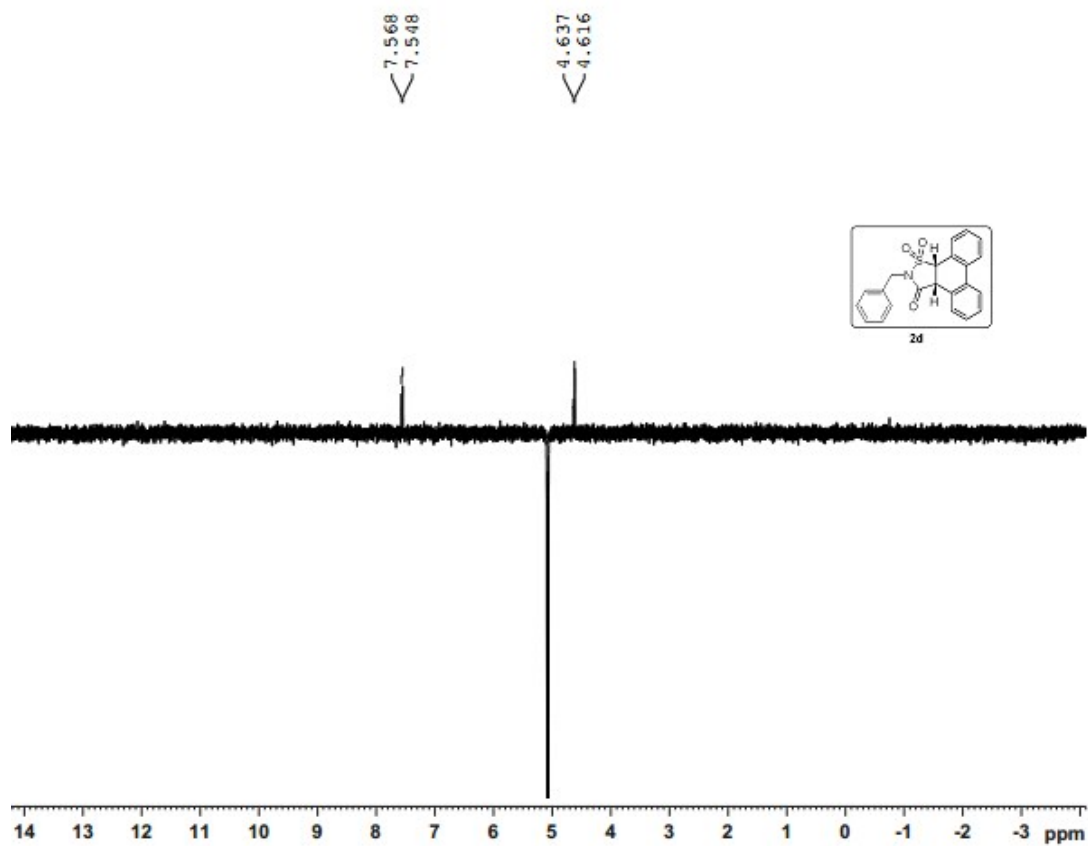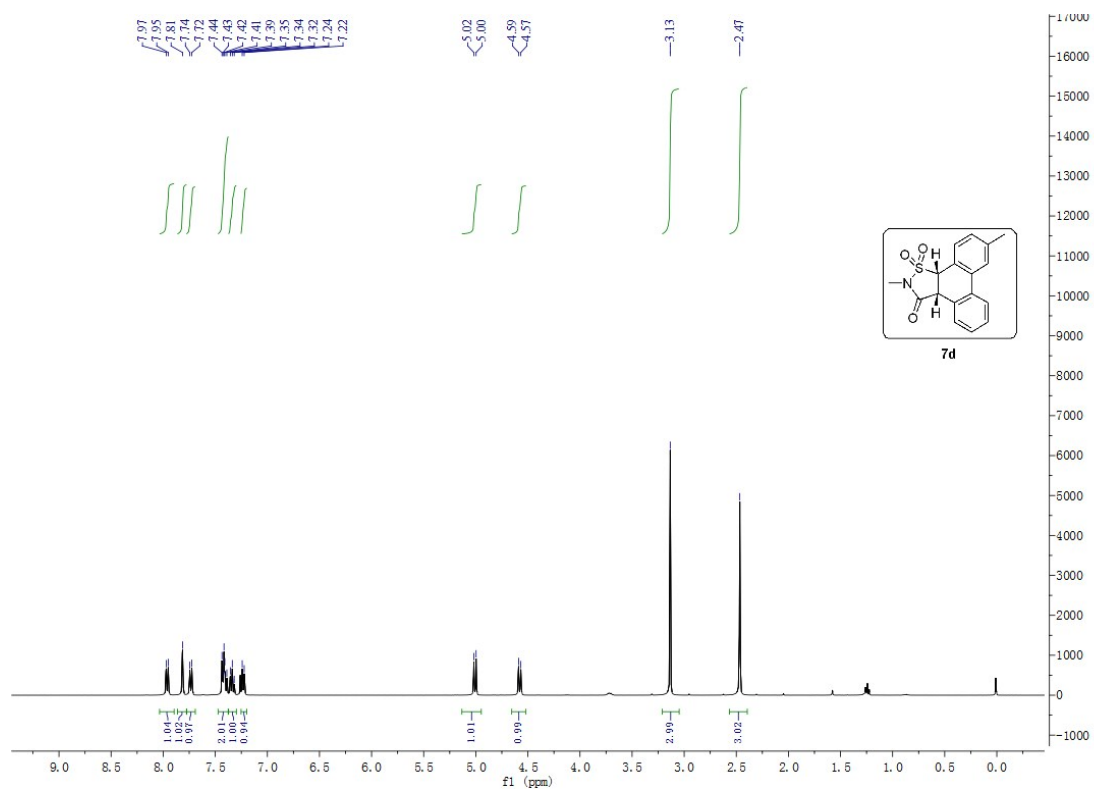

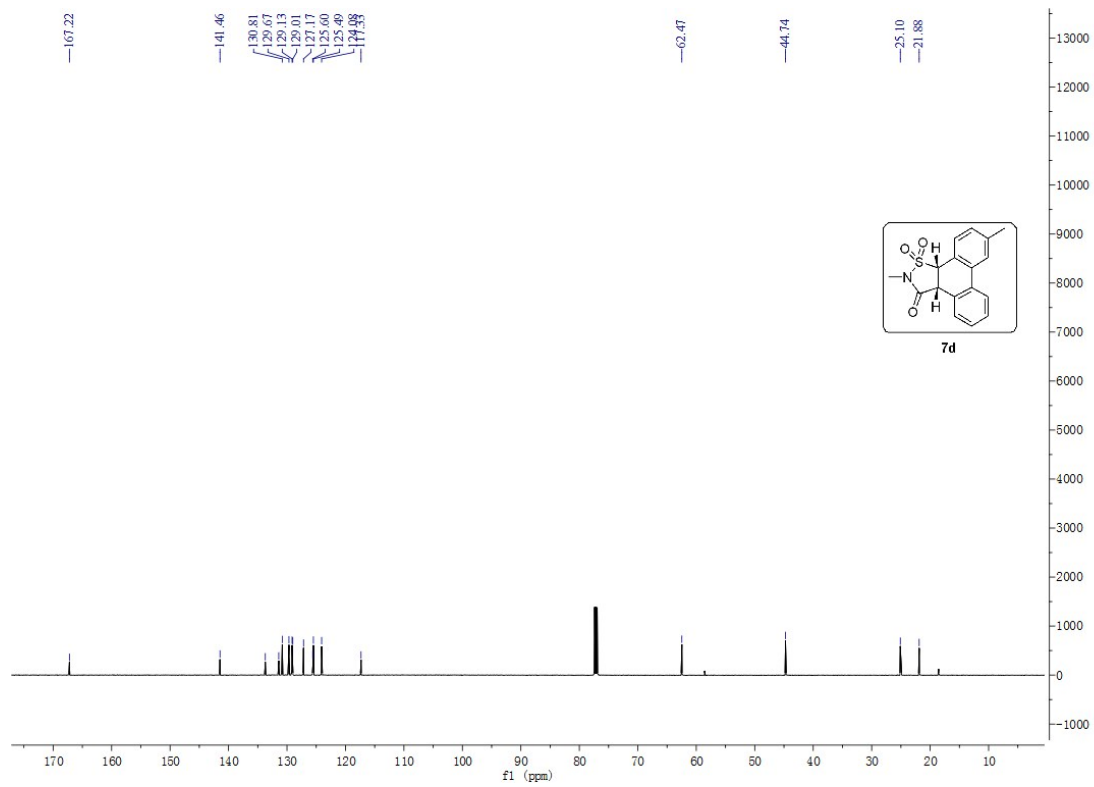

The NOE spectrum of **7d**.

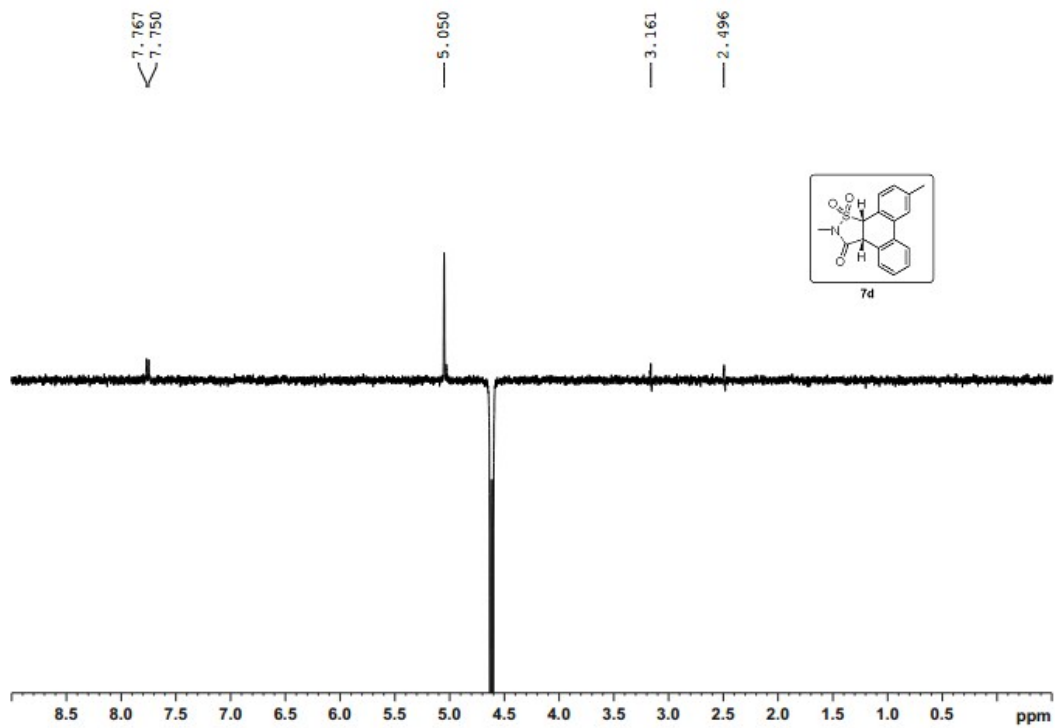

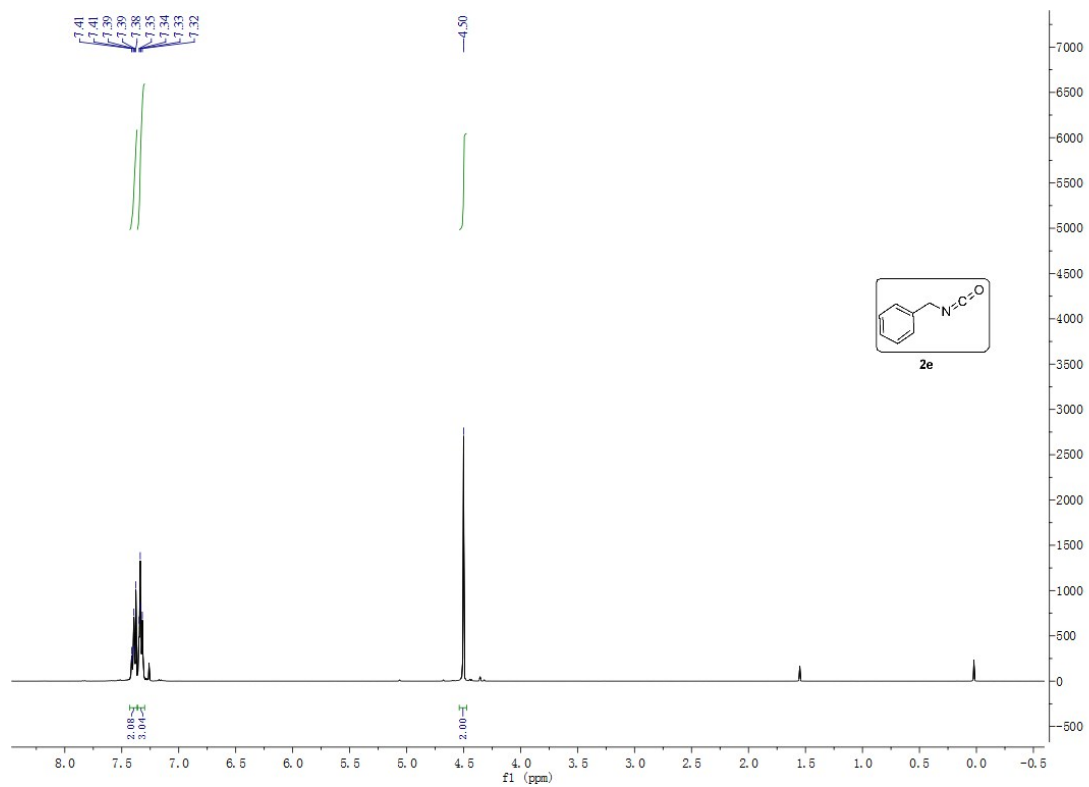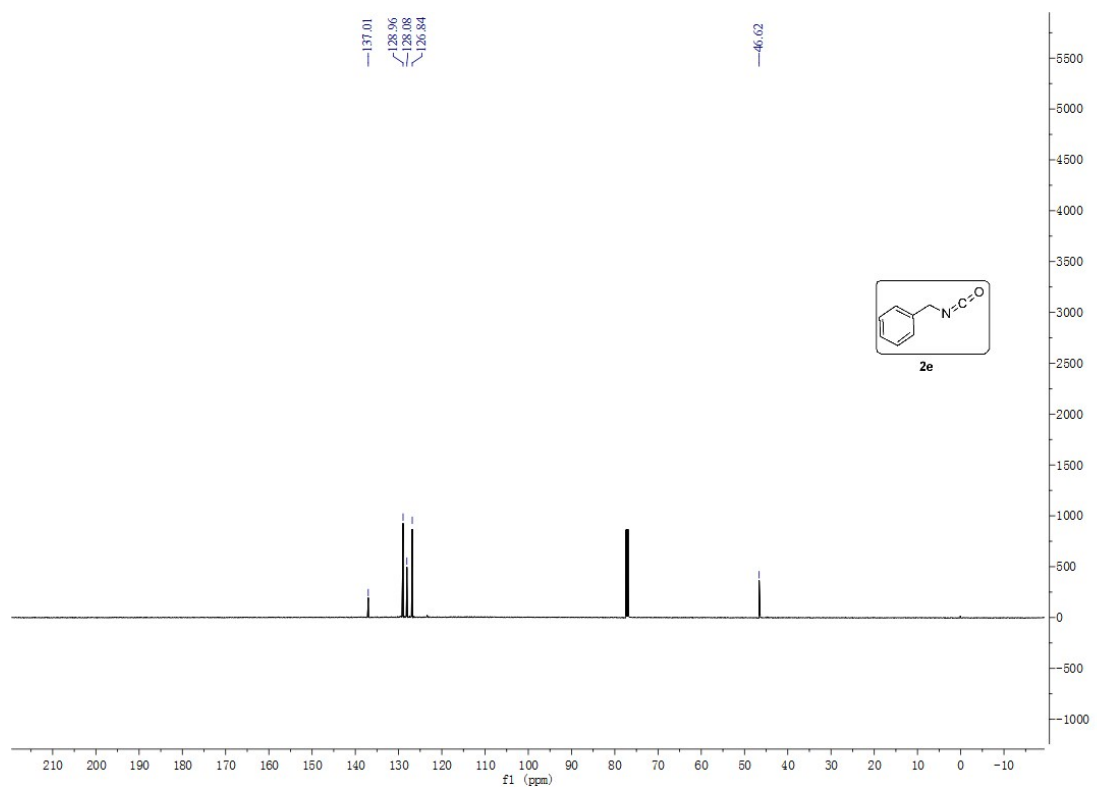

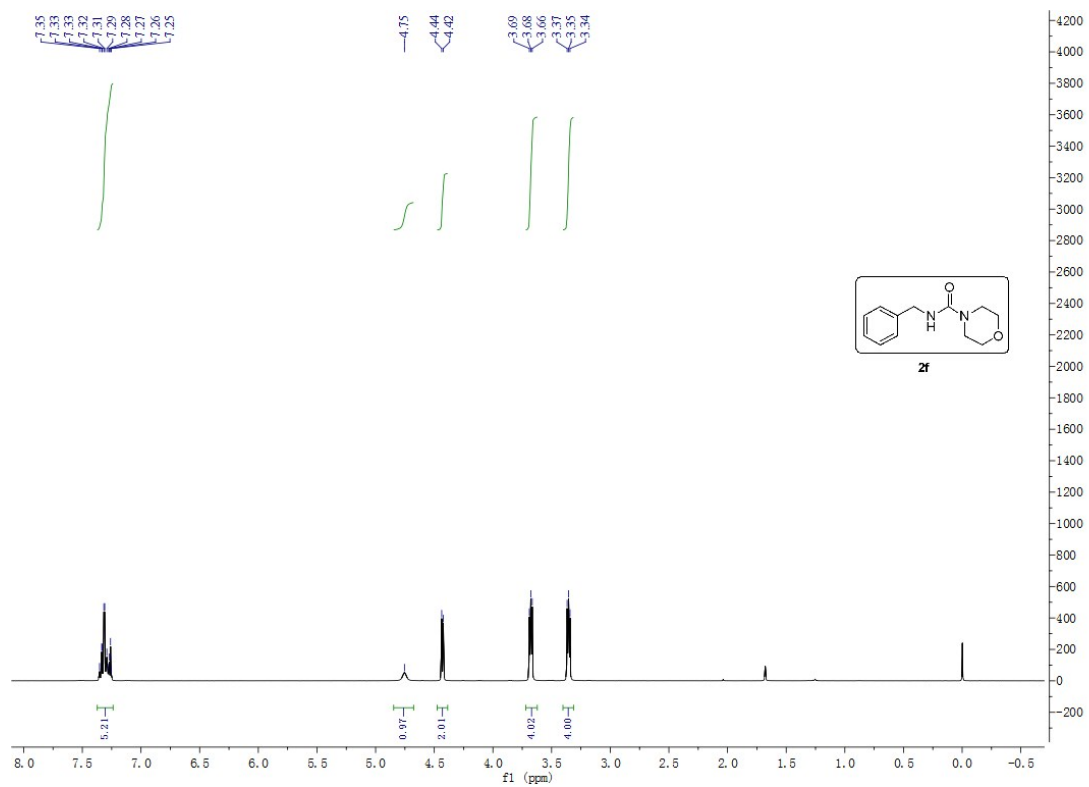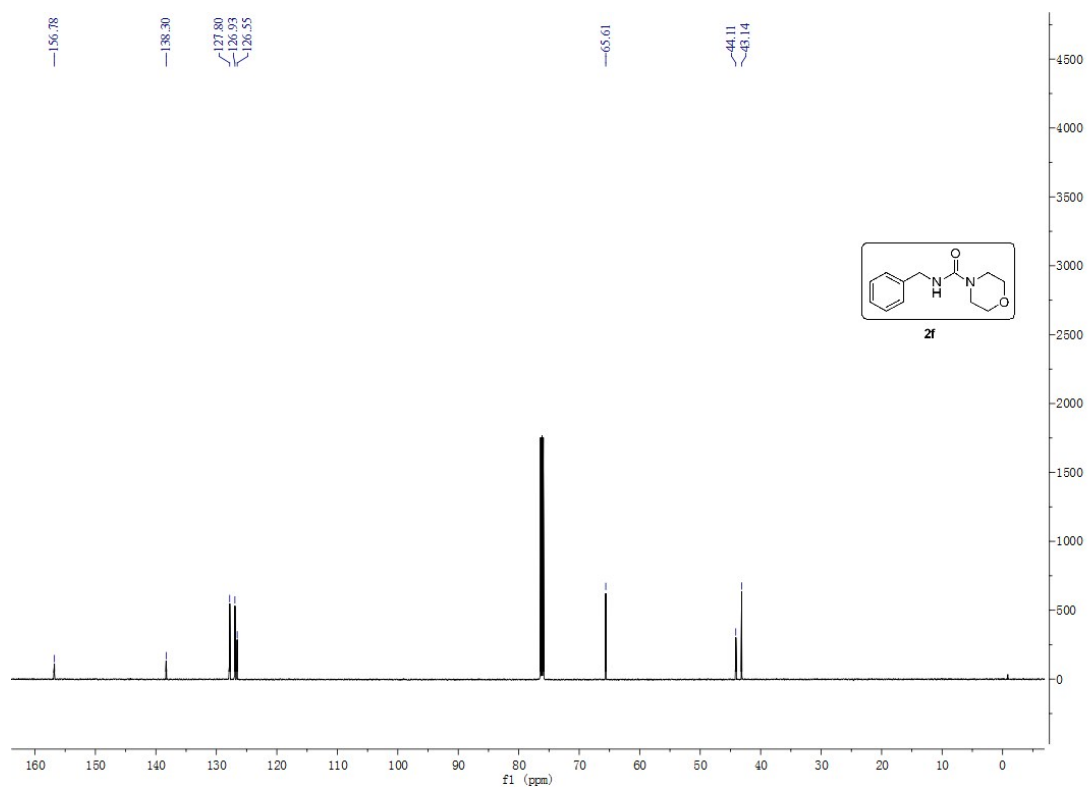

Supplement: c7ra00193b1.pdf [file c7ra00193b1.pdf]
